# Supplementary material for: Efficient synthesis of novel pyrrolo[2,3-c]pyridone derivatives using the Ugi four-component reaction followed by condensation reaction
Source: Royal Society of Chemistry journal article supplement (doi:10.1039/c6nj02569b), 2016-11-09

**Supporting Information for**

**Efficient synthesis of novel pyrrolo[2,3-c]pyridone derivatives using Ugi four-component reaction followed by condensation reaction**

JalliVenkataprasad\*, Suvratha Krishnamurthy, TetsujiMoriguchi and Akihiko Tsuge

Address:Department of Applied Chemistry, Kyushu Institute of Technology, Kitakyushu, Fukuoka, 8048550, Japan

Email: jvprasad.008@gmail.com

\* Corresponding author

**Experimental procedure for the PTSA promoted sequential one pot of synthesis pyrrolo[2,3-c]pyridone (6a):**

Pyrrole-2-carbaldehyde (1 mmol), 4-bromo aniline (1 mmol), phenylglyoxylic acid (1.2 mmol) and *t*-butyl isocyanide (1 mmol) were taken in 3 mL methanol. This mixture was stirred at room temperature for 60 min and PTSA (50 mol%) was added to the same reaction mixture and heated at 50°C for 2h. The volatiles were removed under reduced pressure and product 6a was purified by flash column chromatography in 70% yield.

**Table 1.** Crystal data and structure refinement for **6g**

|                                 |                                                                                                 |
|---------------------------------|-------------------------------------------------------------------------------------------------|
| CCDC number                     | 1484244                                                                                         |
| Empirical formula               | $2C_{25}H_{24}BrN_3O_3 \cdot 2H_2O$                                                             |
| Formula weight                  | 1024.80                                                                                         |
| Temperature                     | 90K                                                                                             |
| Wavelength                      | 0.71073Å                                                                                        |
| Crystal system, space group     | Monoclinic, $P2_1/n$                                                                            |
| Unit cell dimensions            | a= 17.720 (4) alpha=90 deg.<br>b= 9.681(2) beta= 107.915(2) deg.<br>c = 27.874(6) gamma=90 deg. |
| Volume                          | 4549.9 (18) Å <sup>3</sup>                                                                      |
| Z                               | 4                                                                                               |
| Absorption correction           | Semiempirical from equivalents                                                                  |
| Goodness of fit                 | 1.13                                                                                            |
| Theta range for data collection | 1.22 to 25.01 deg.                                                                              |
| Refinement method               | Full-matrix least squares                                                                       |
| Crystal size                    | 0.40 × 0.15 × 0.15 mm                                                                           |

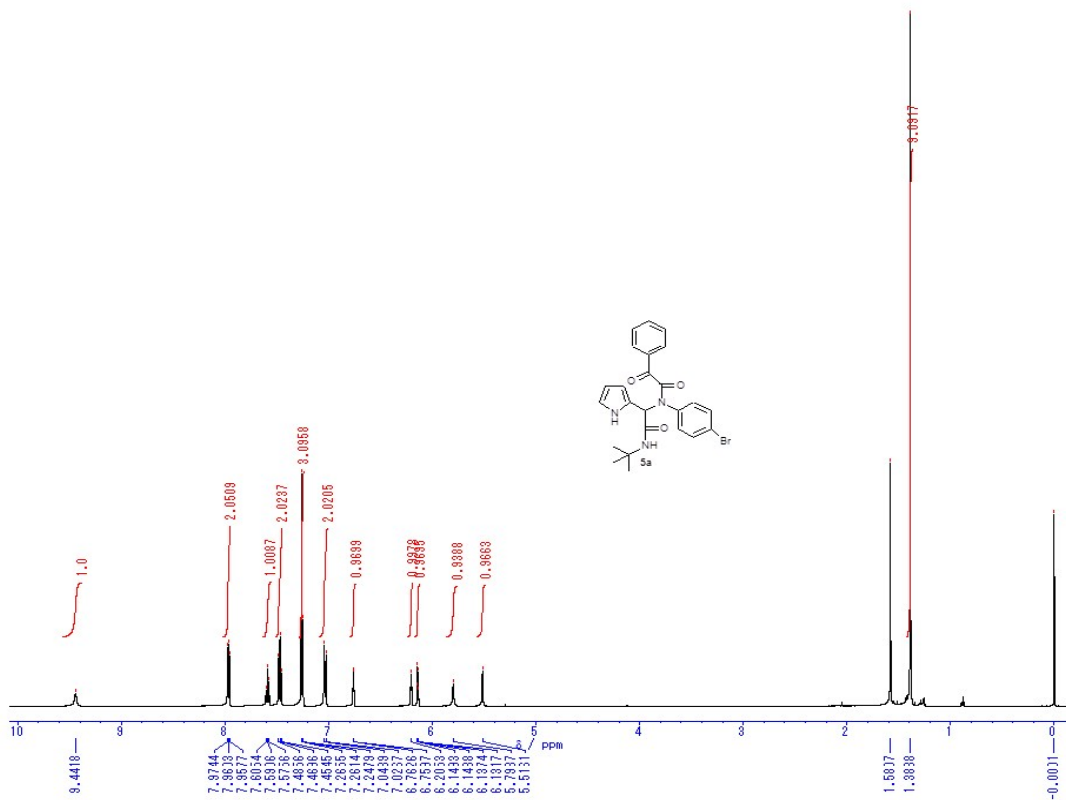

Star

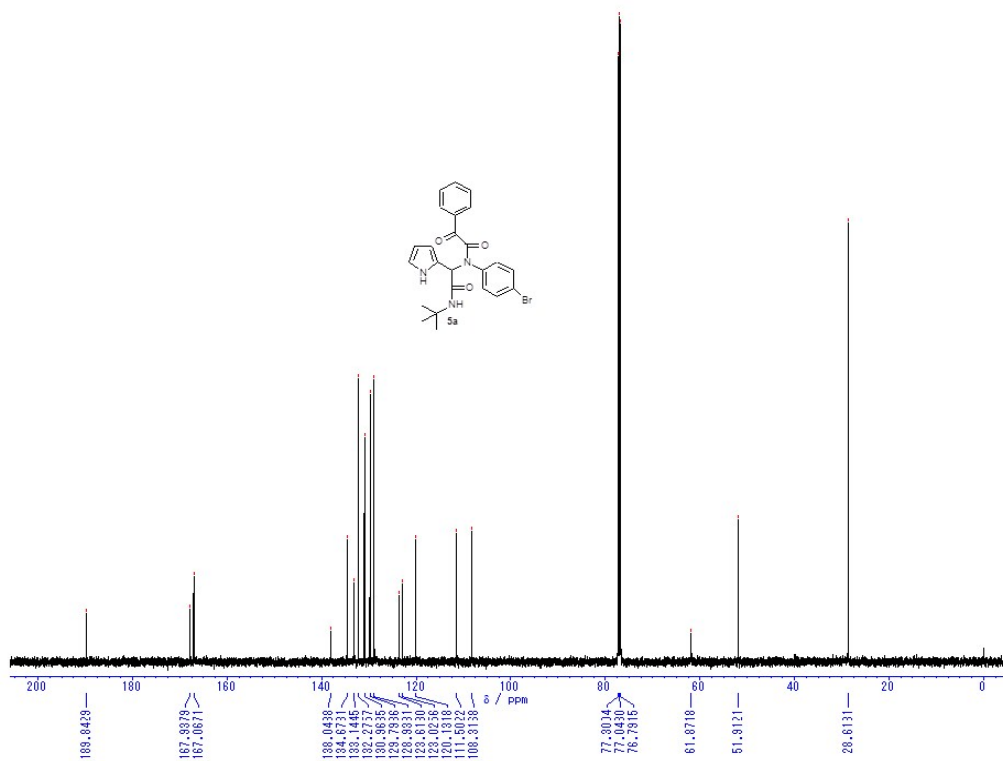

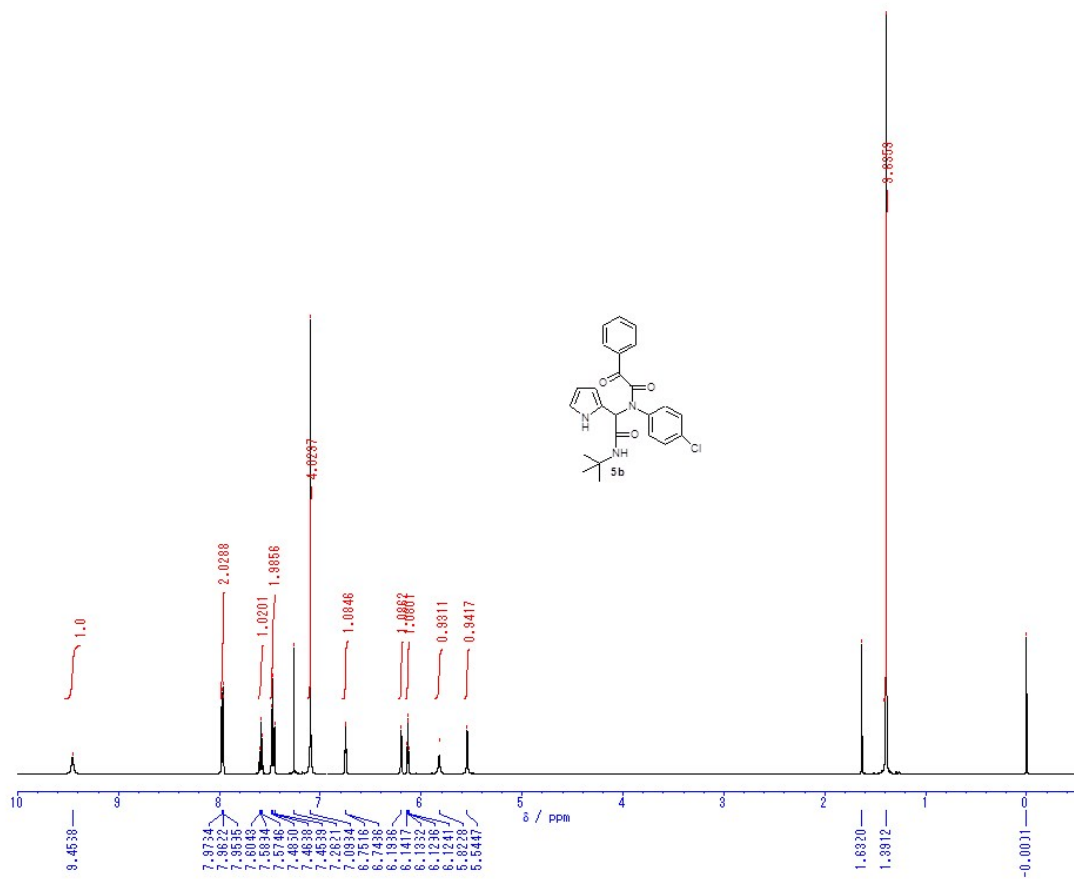

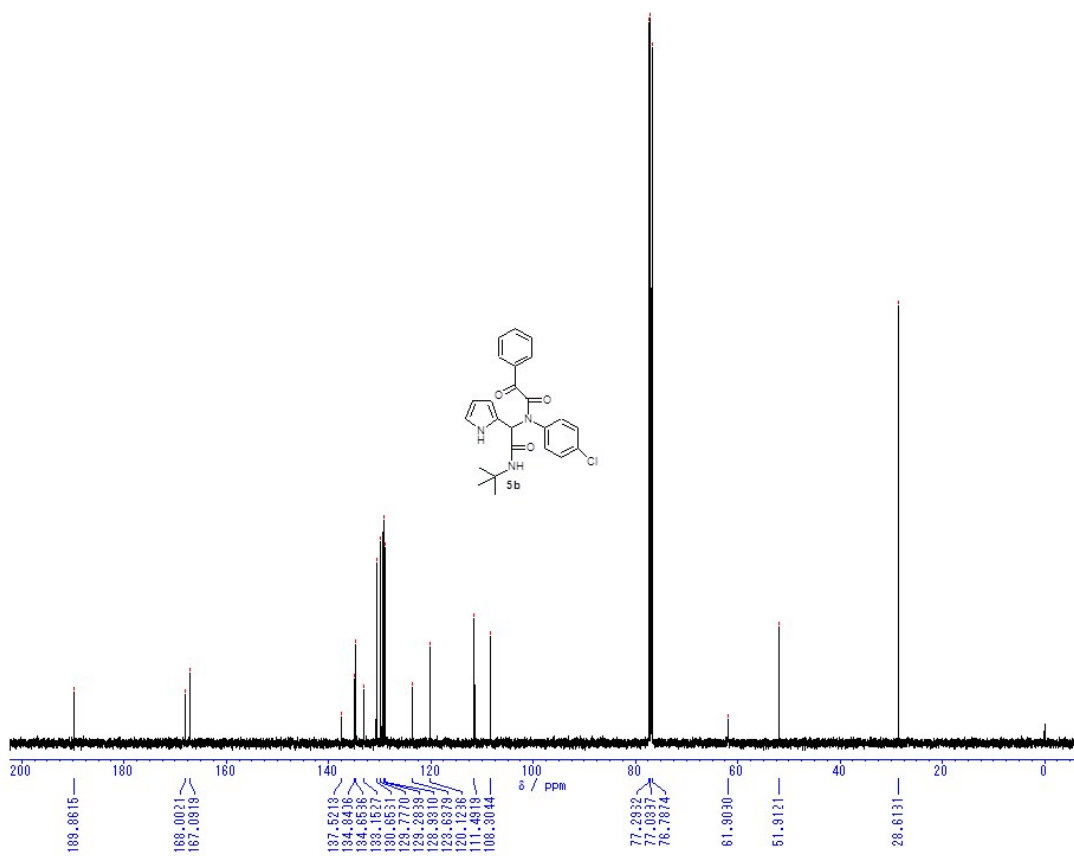

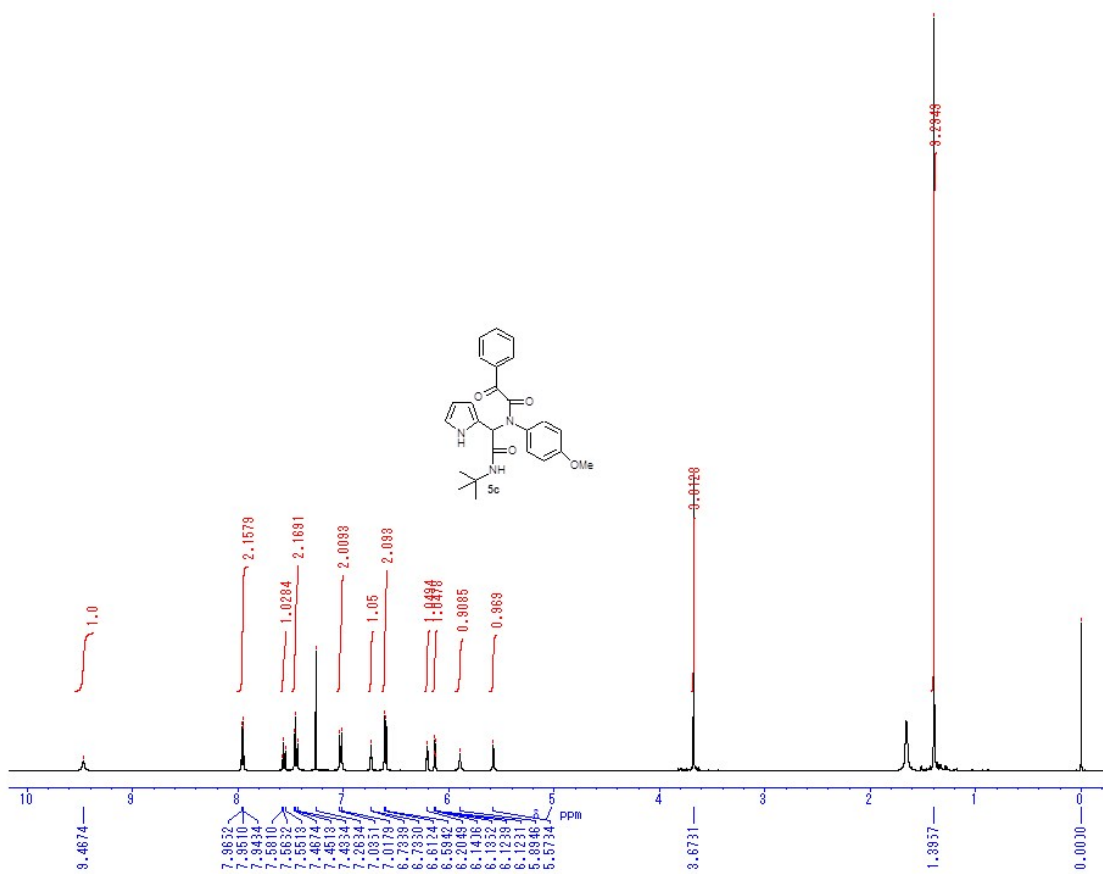

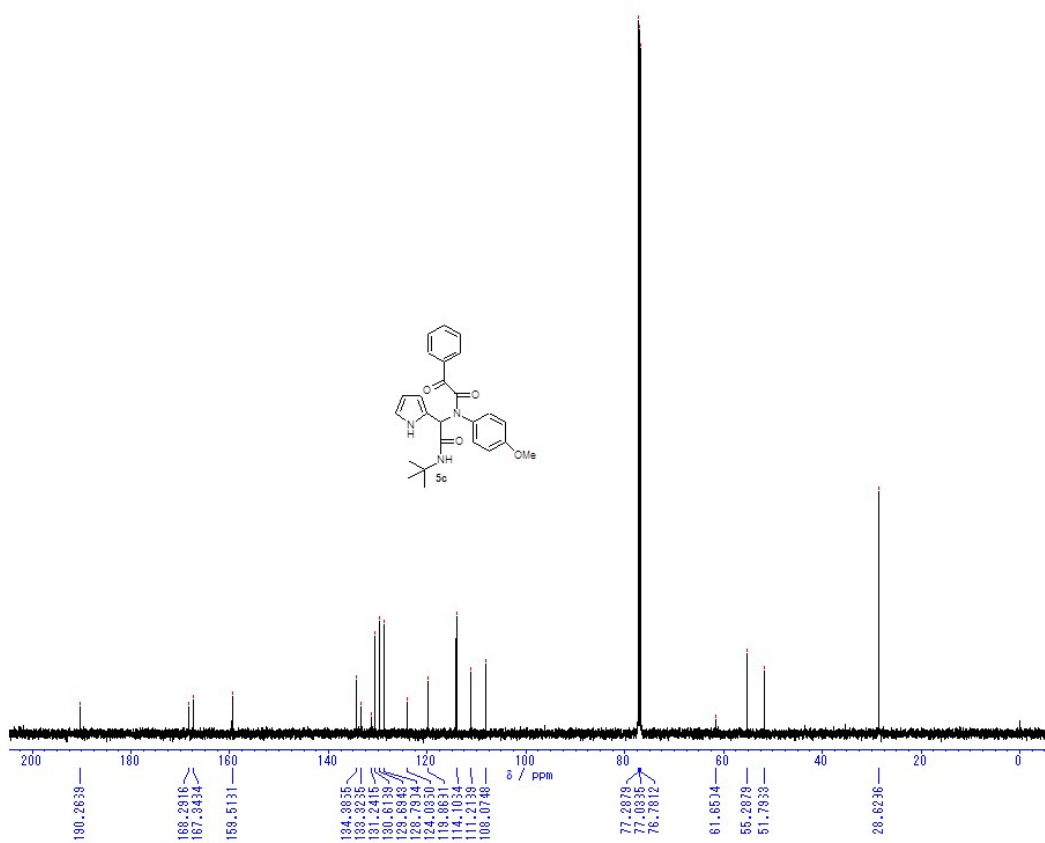



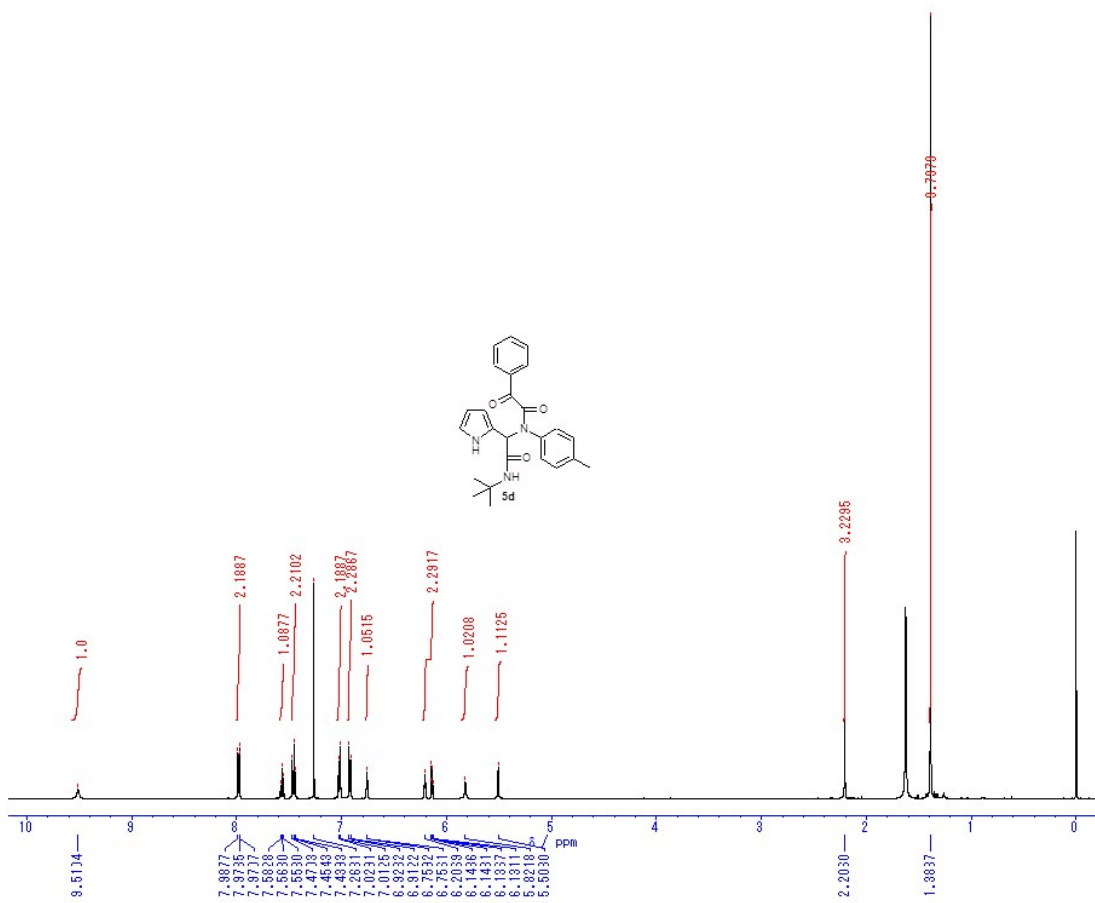

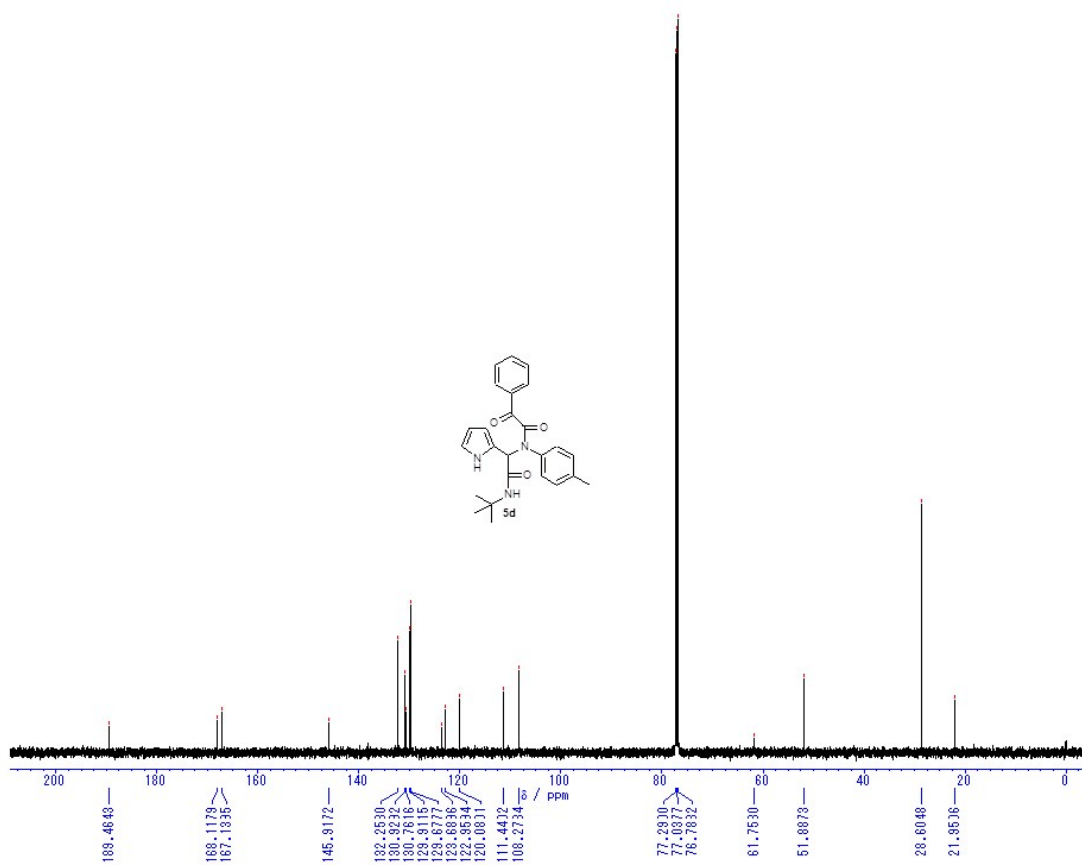

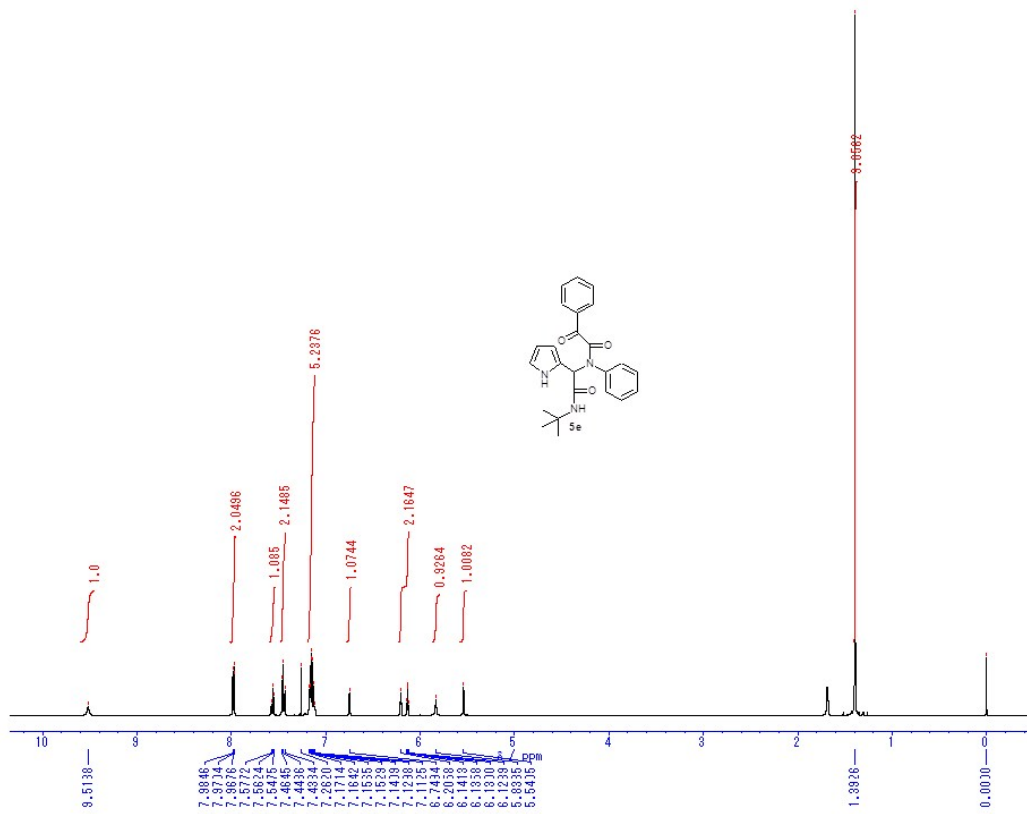

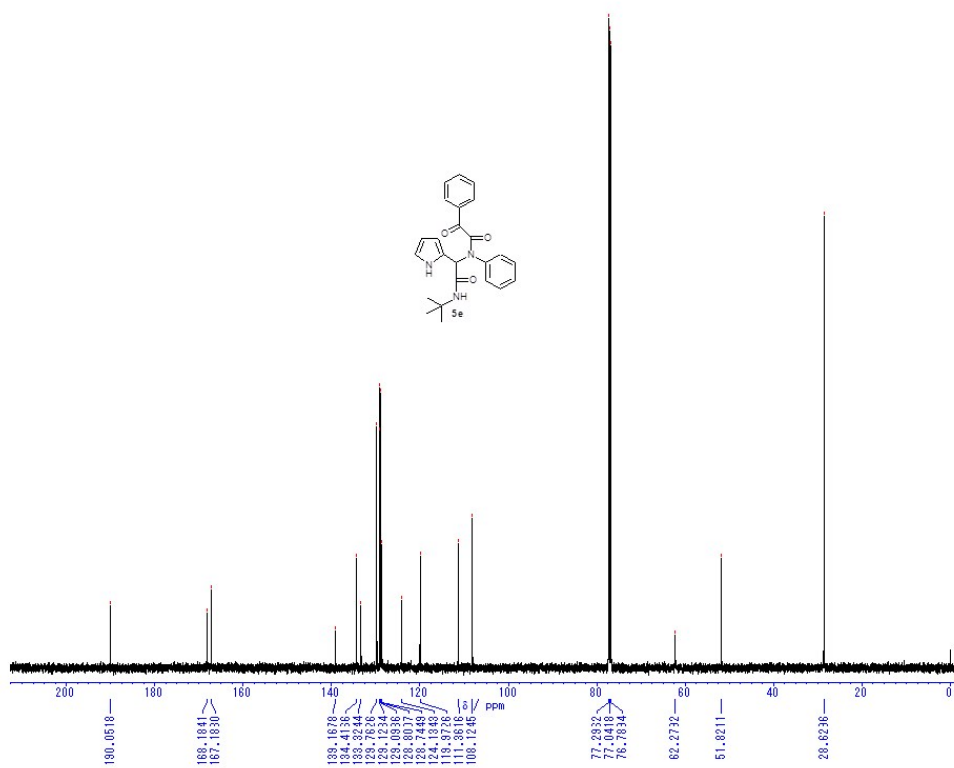

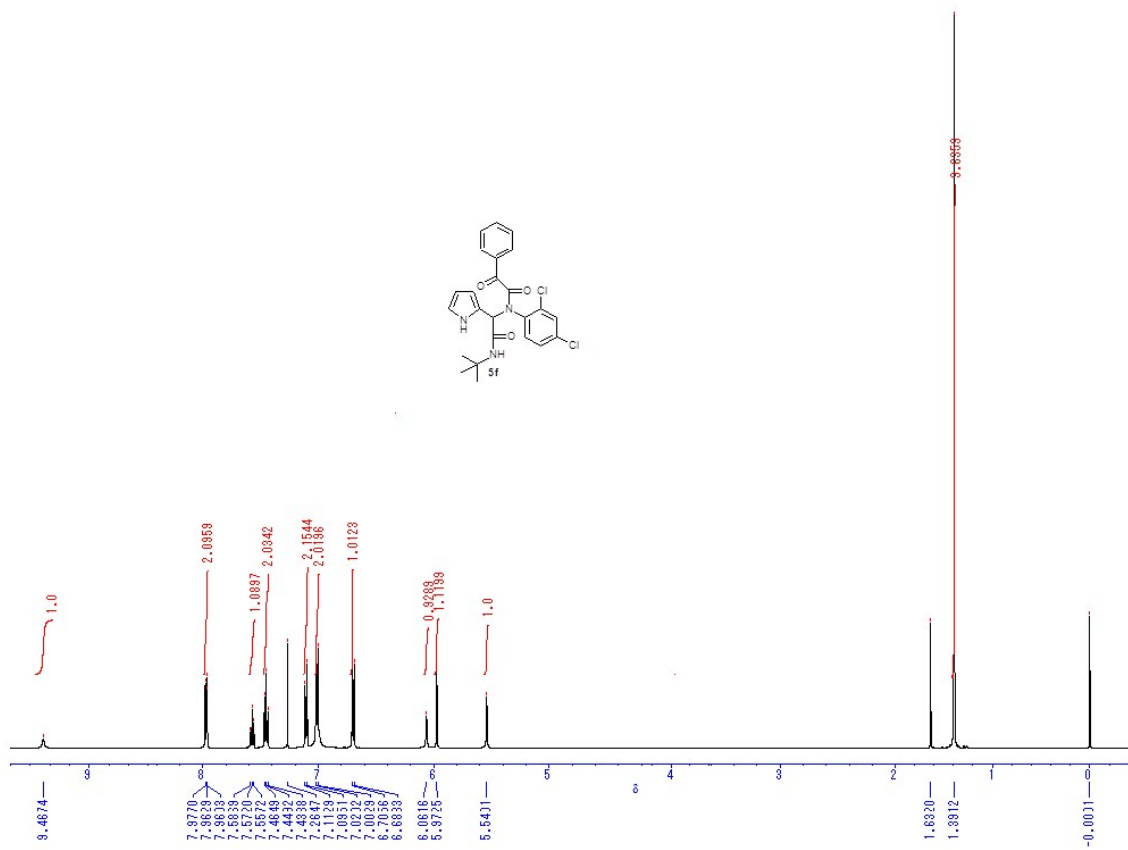

Star

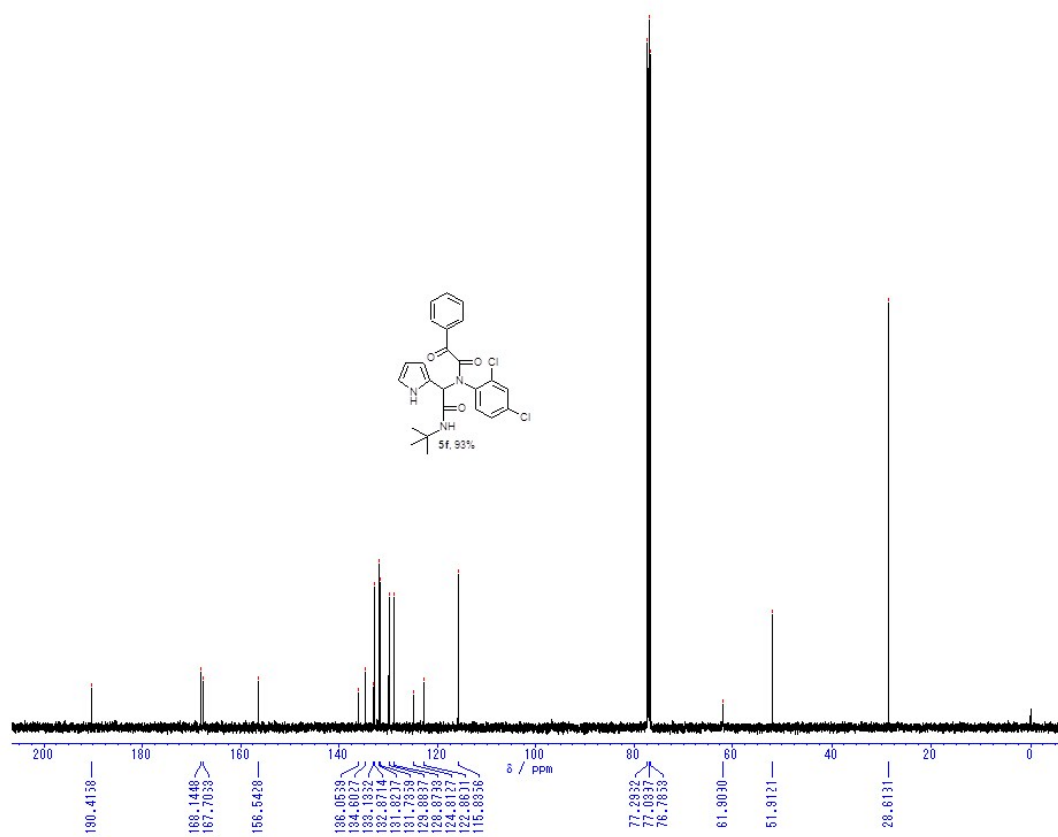

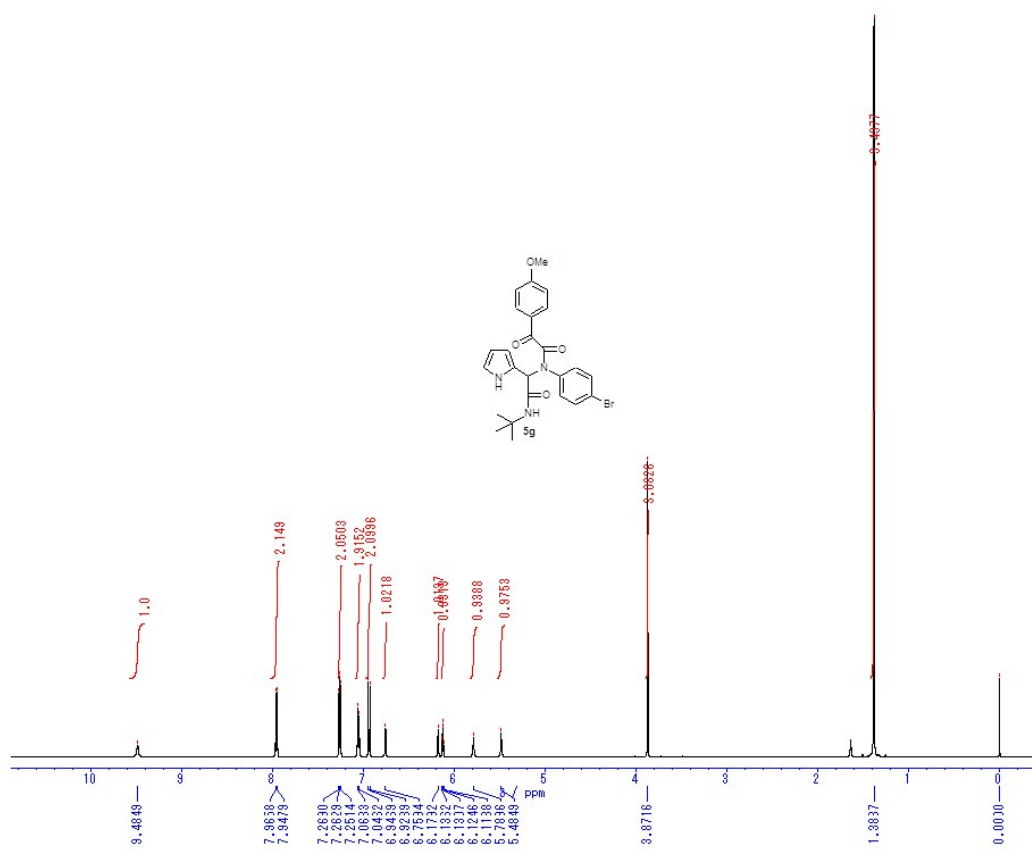

Star

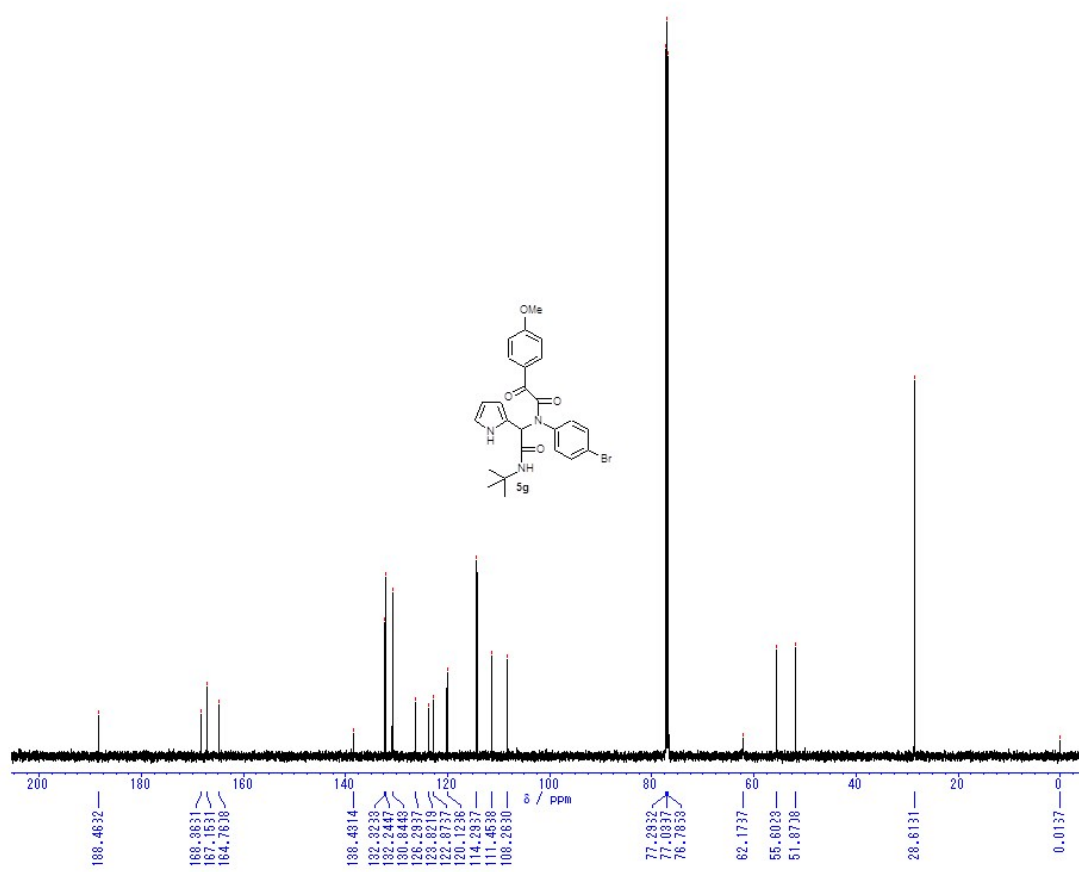



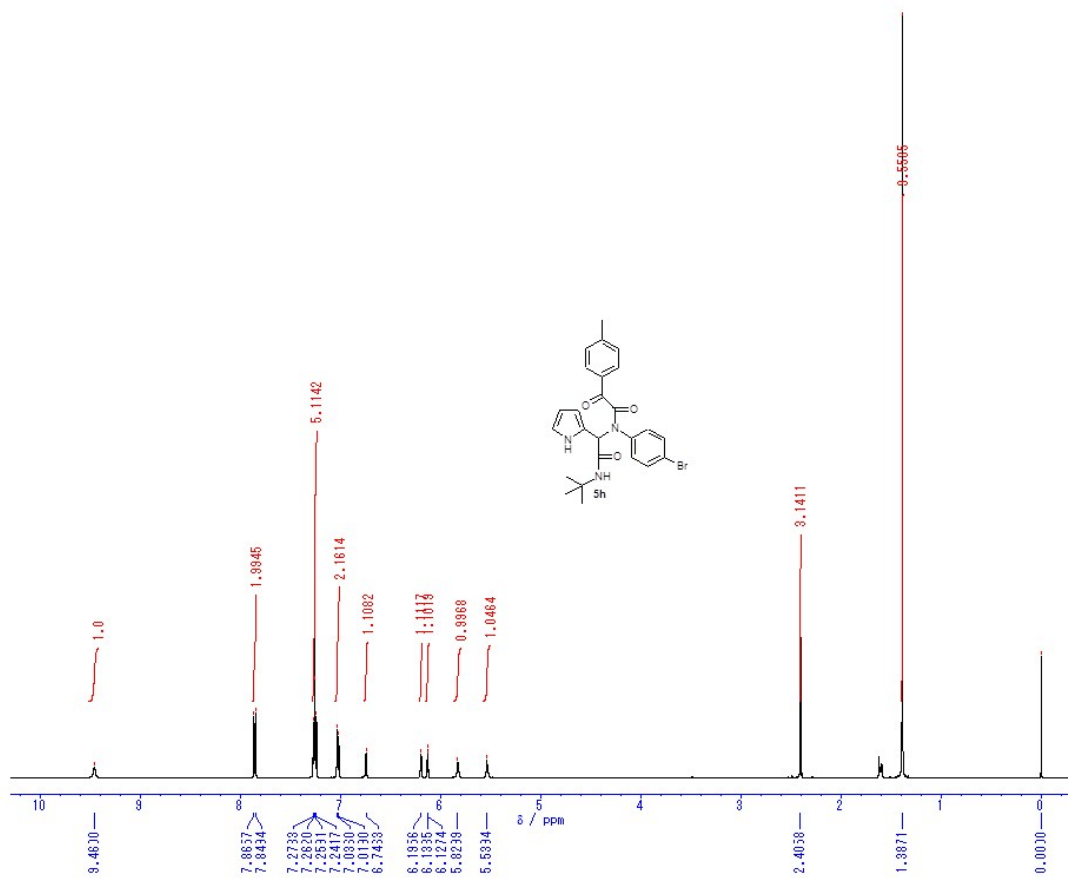



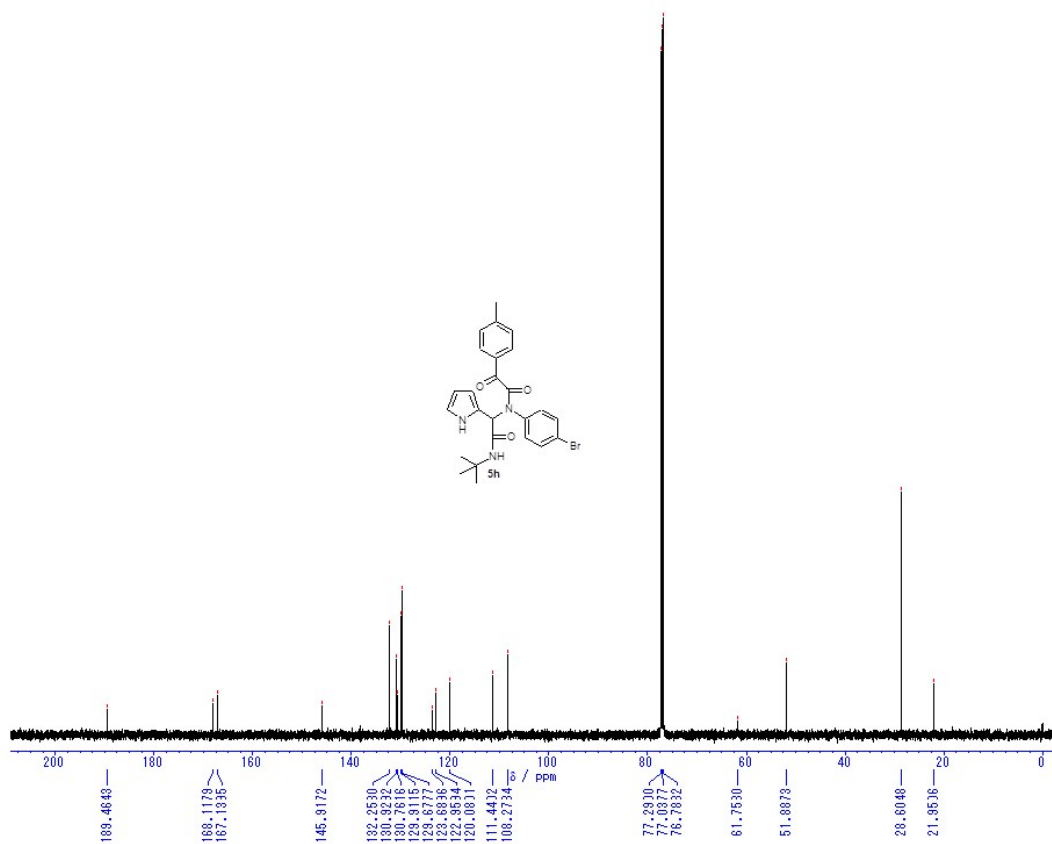

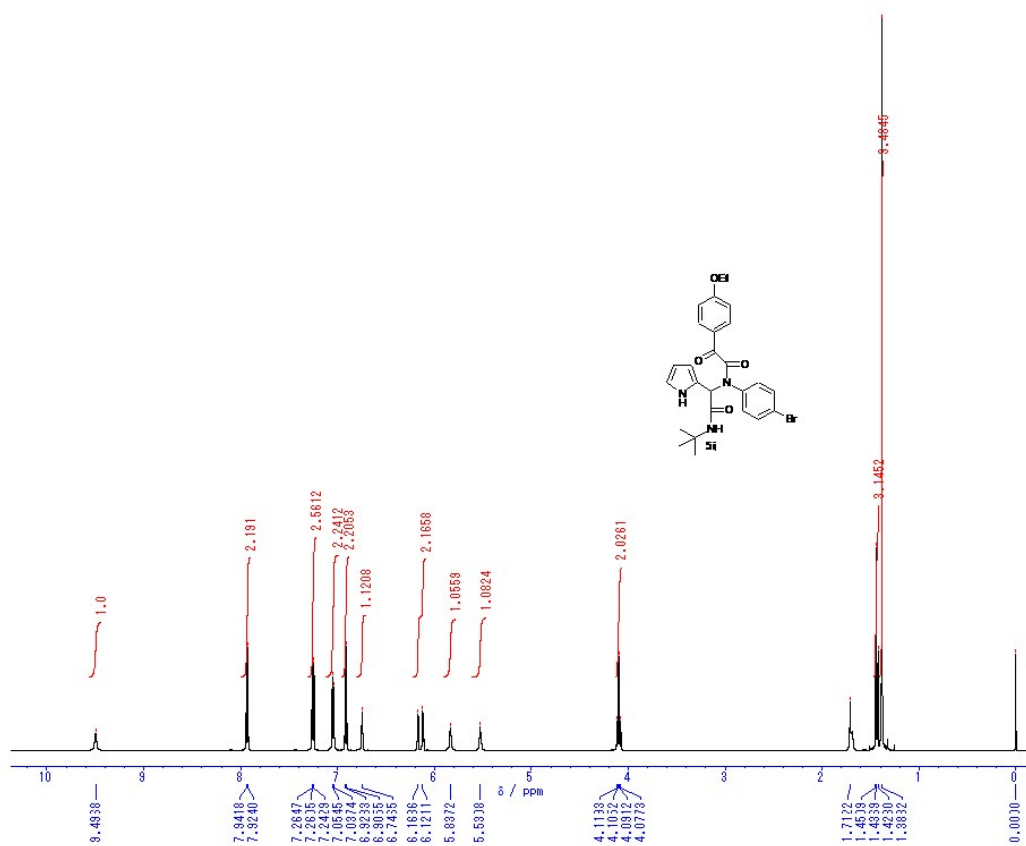

Star

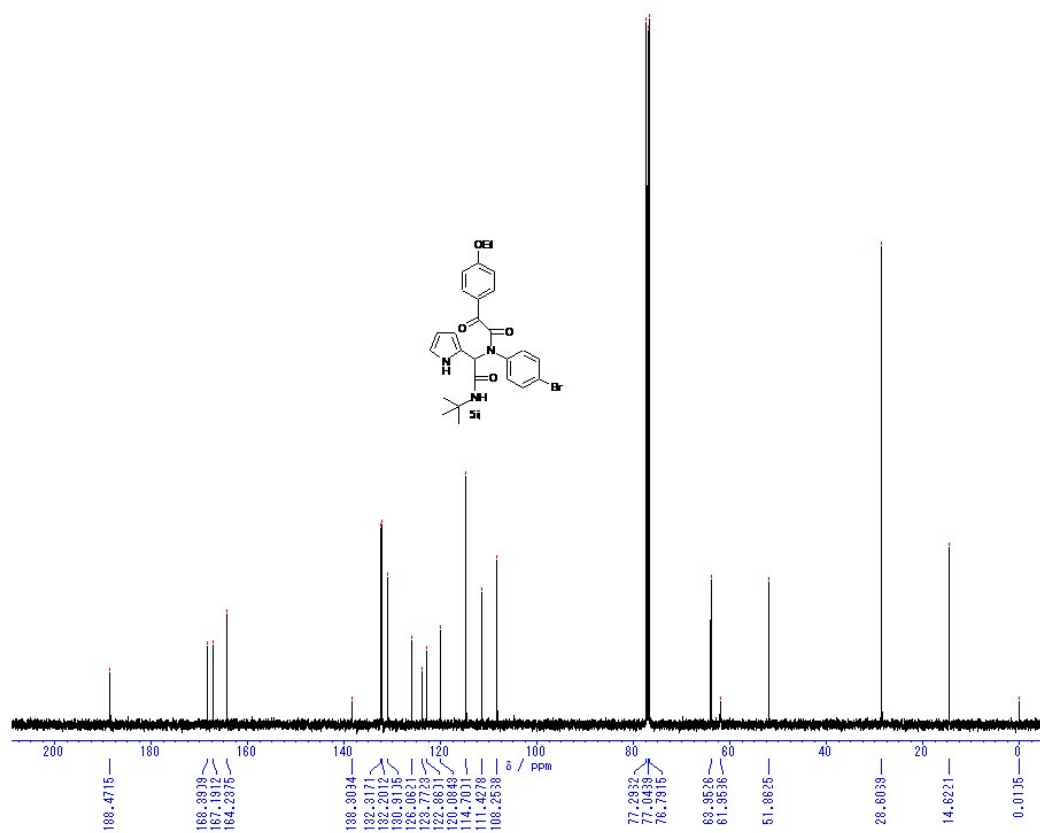

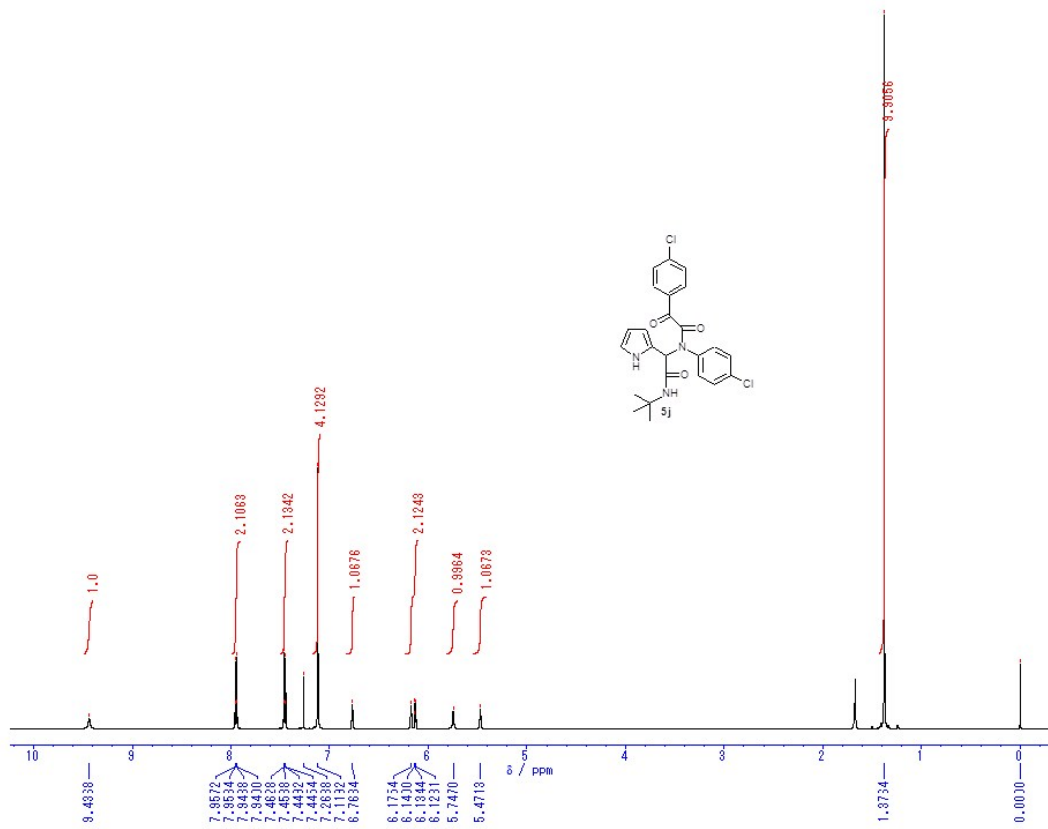

Star

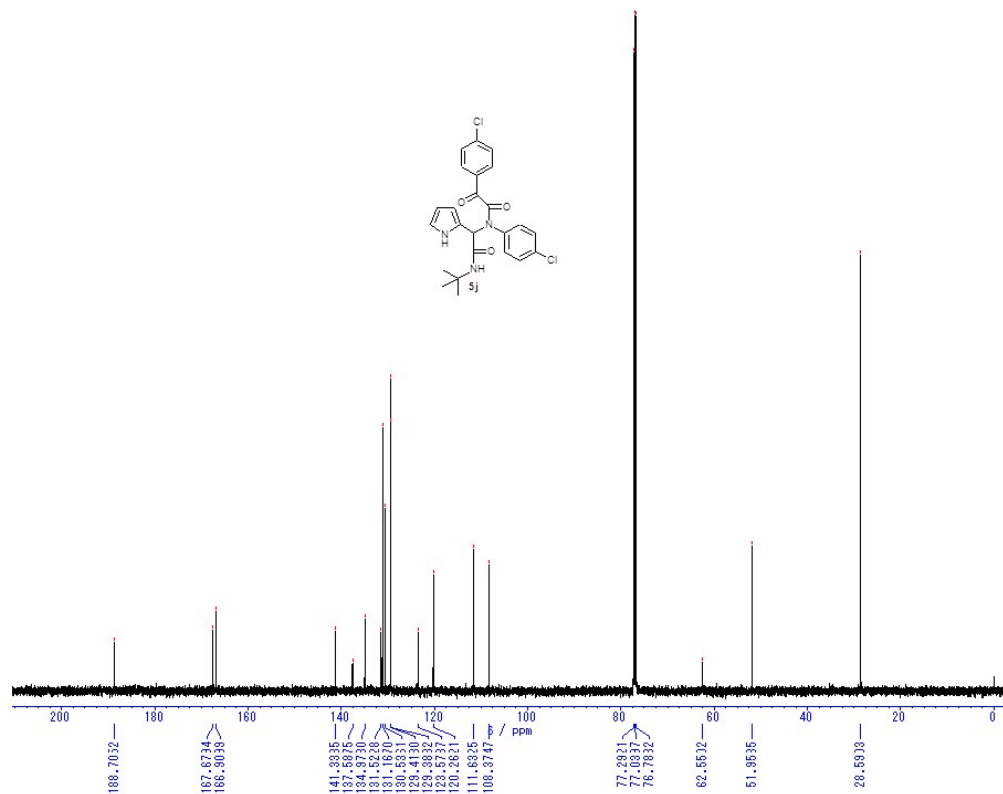

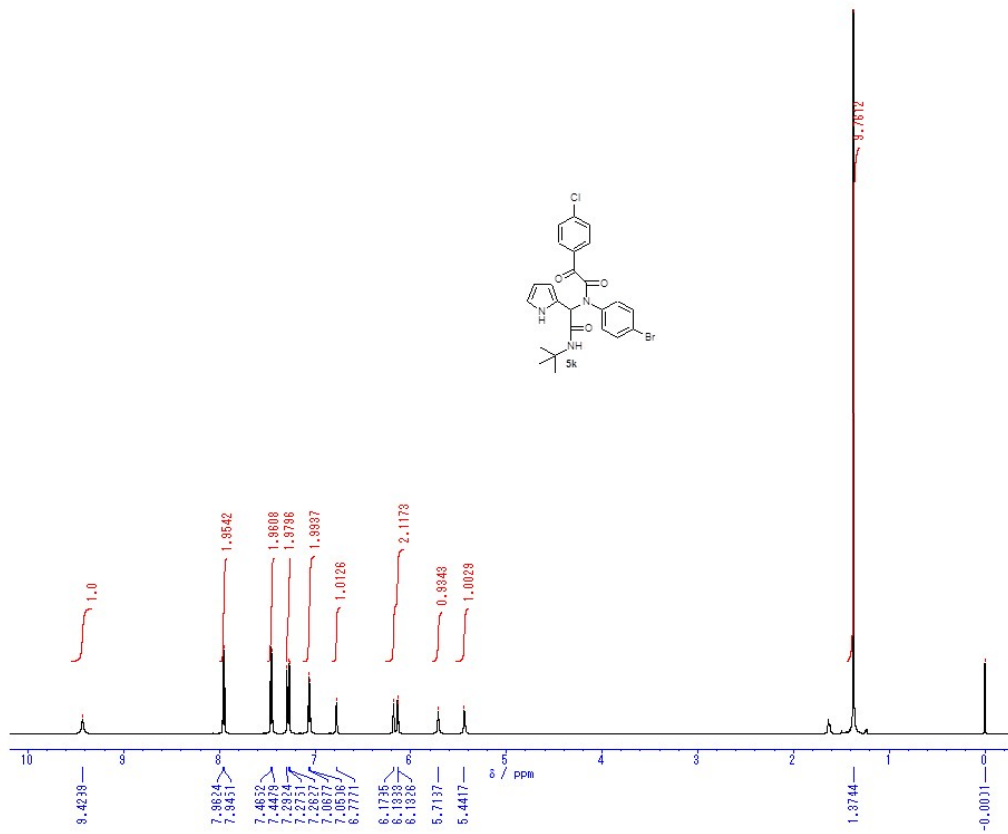

Star



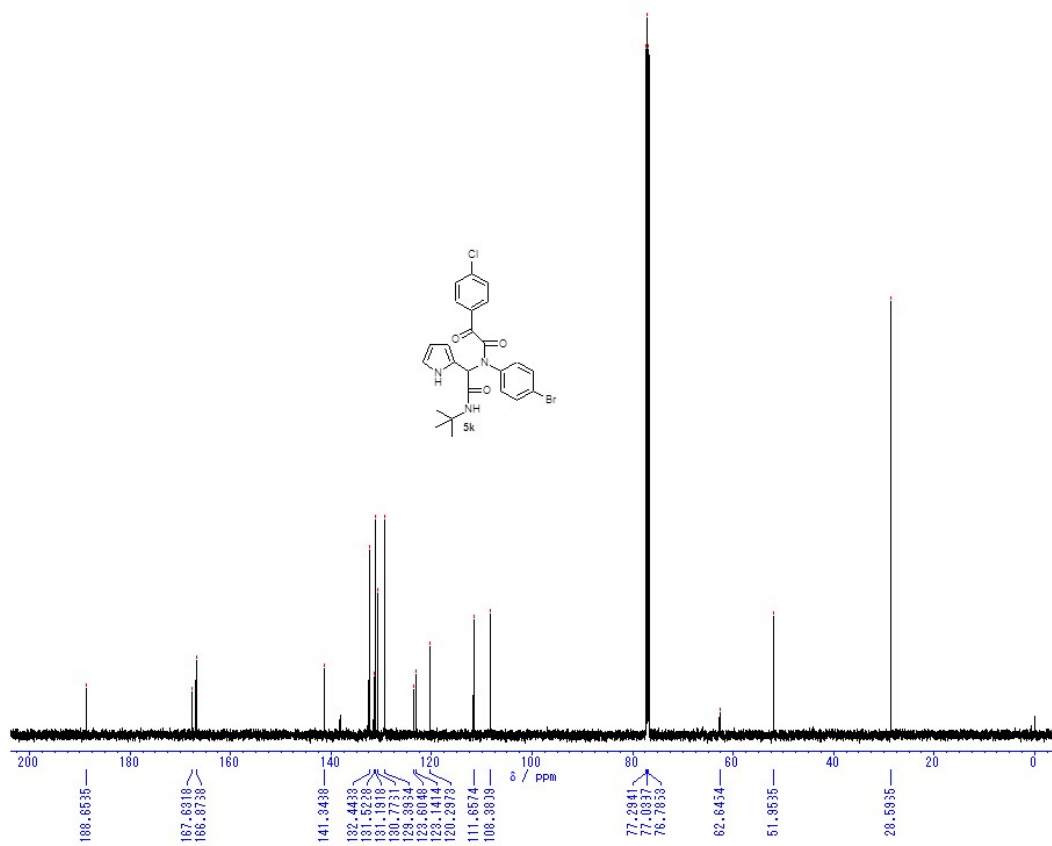

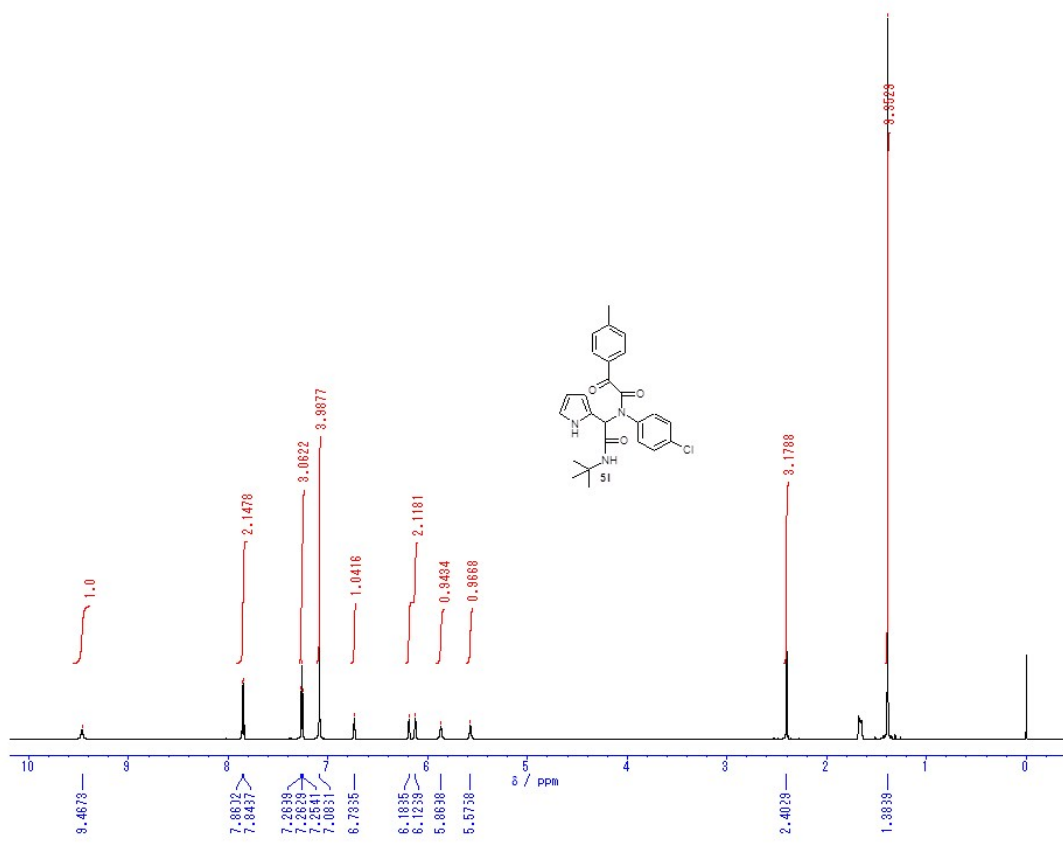

Star

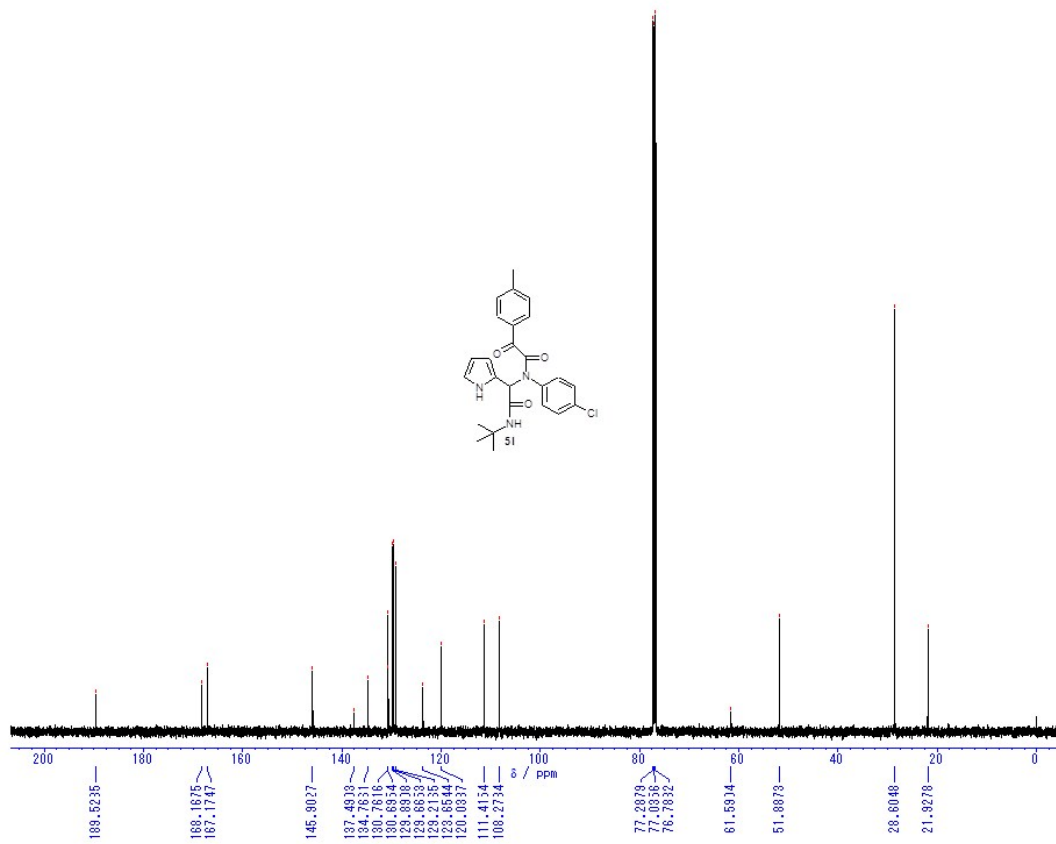

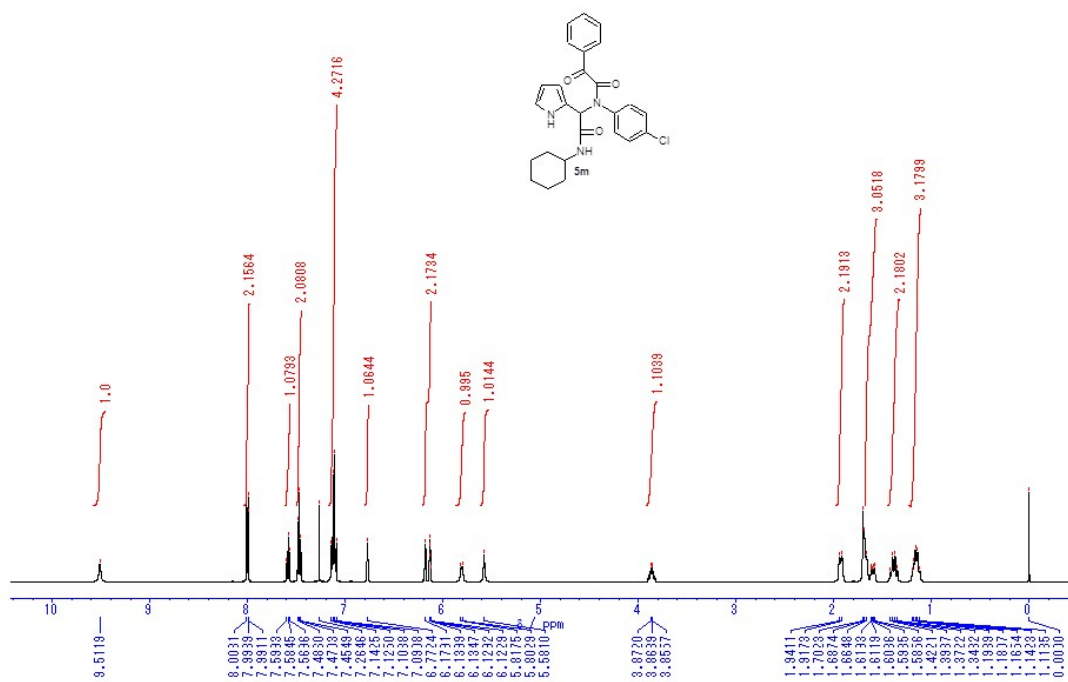

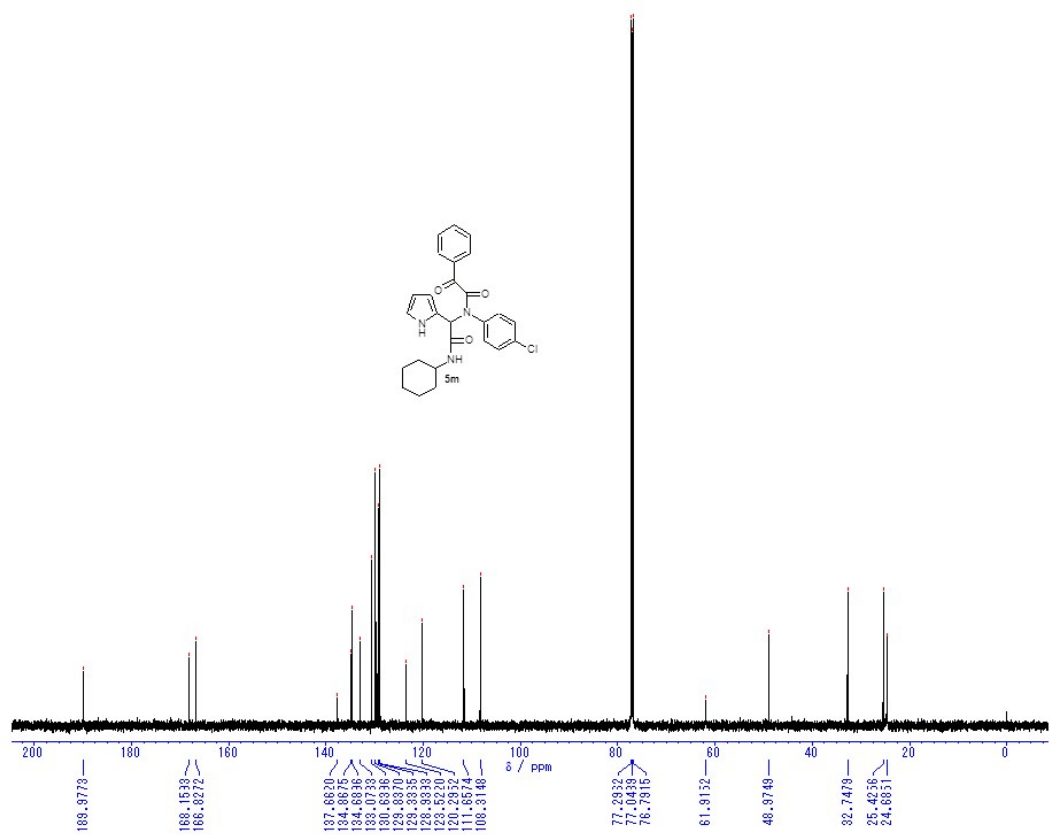

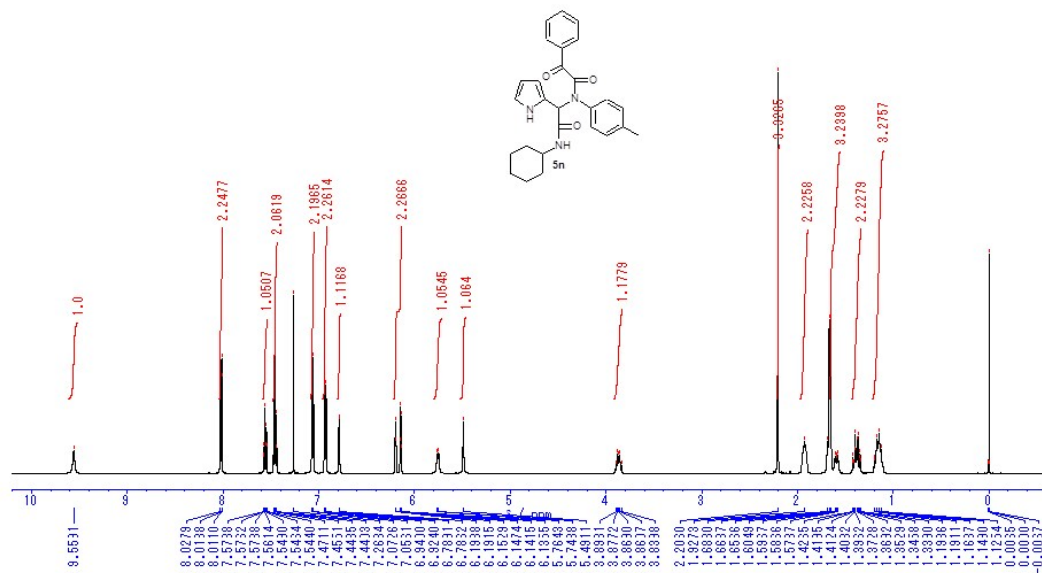

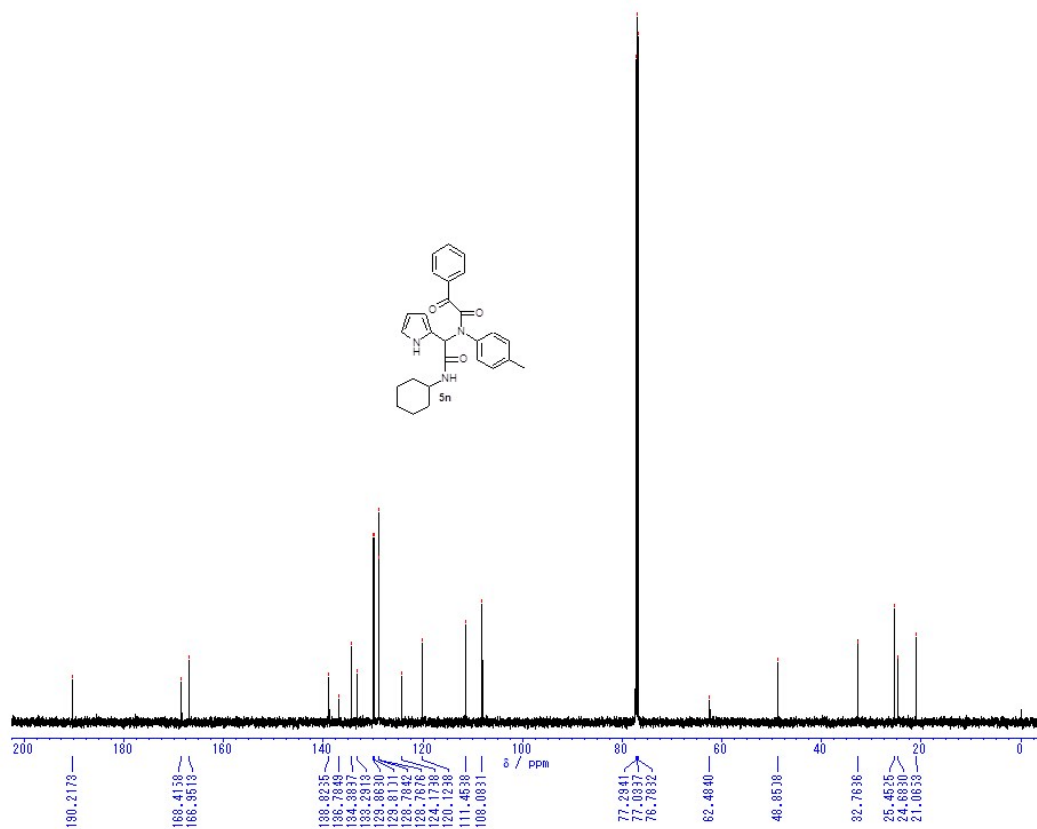

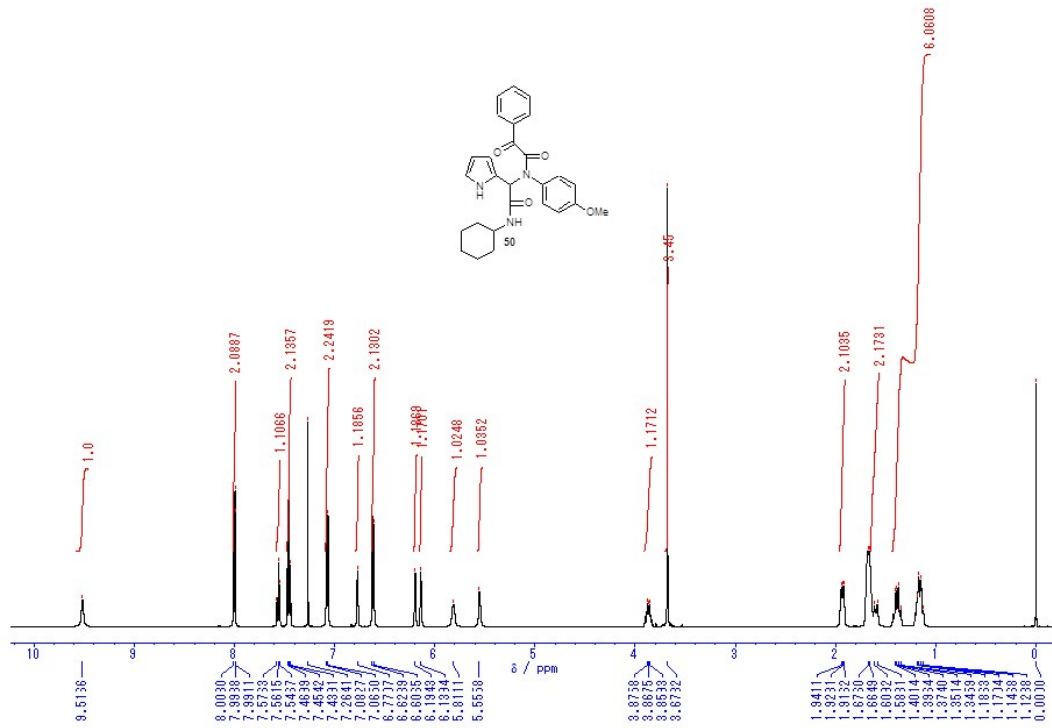



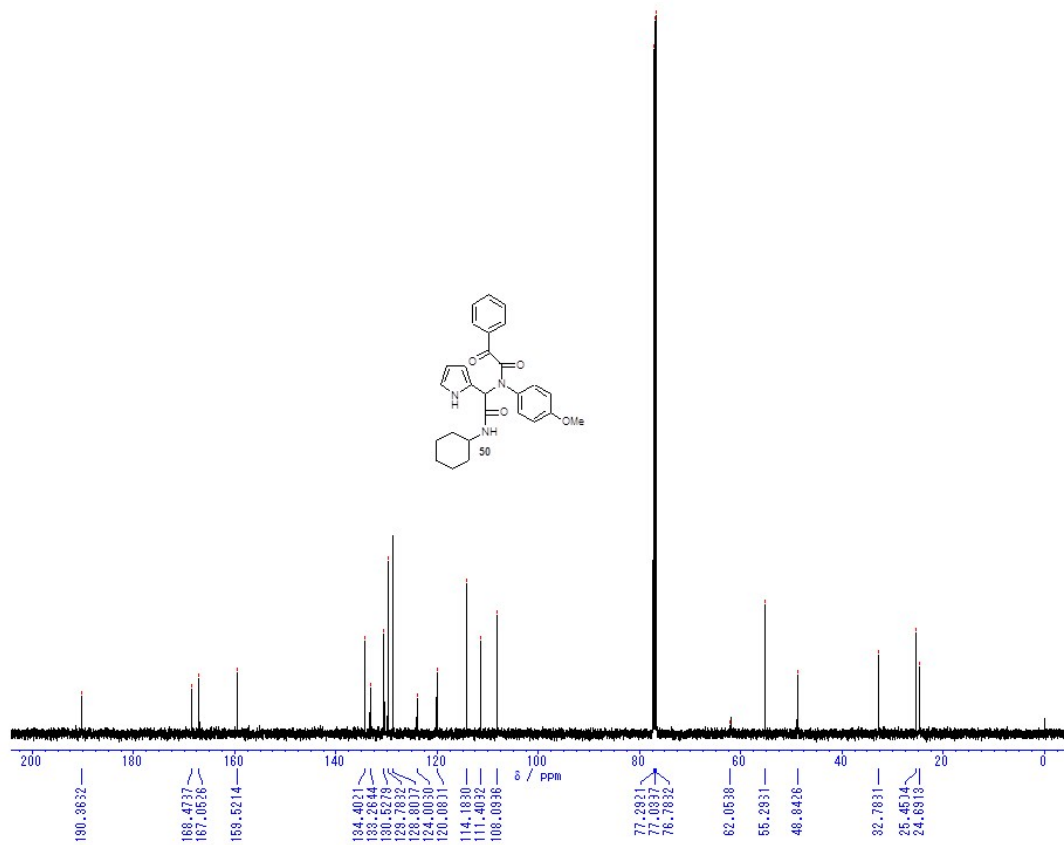

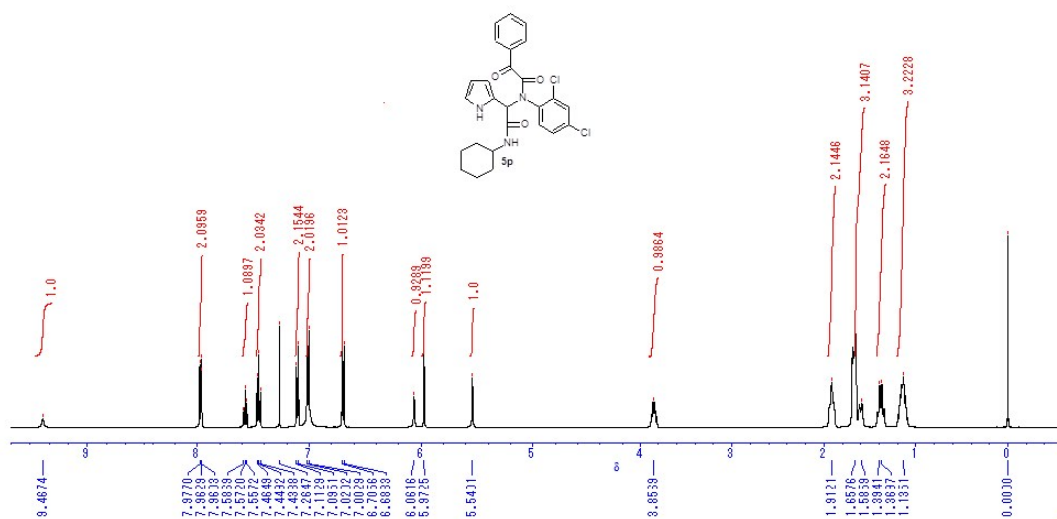

Star

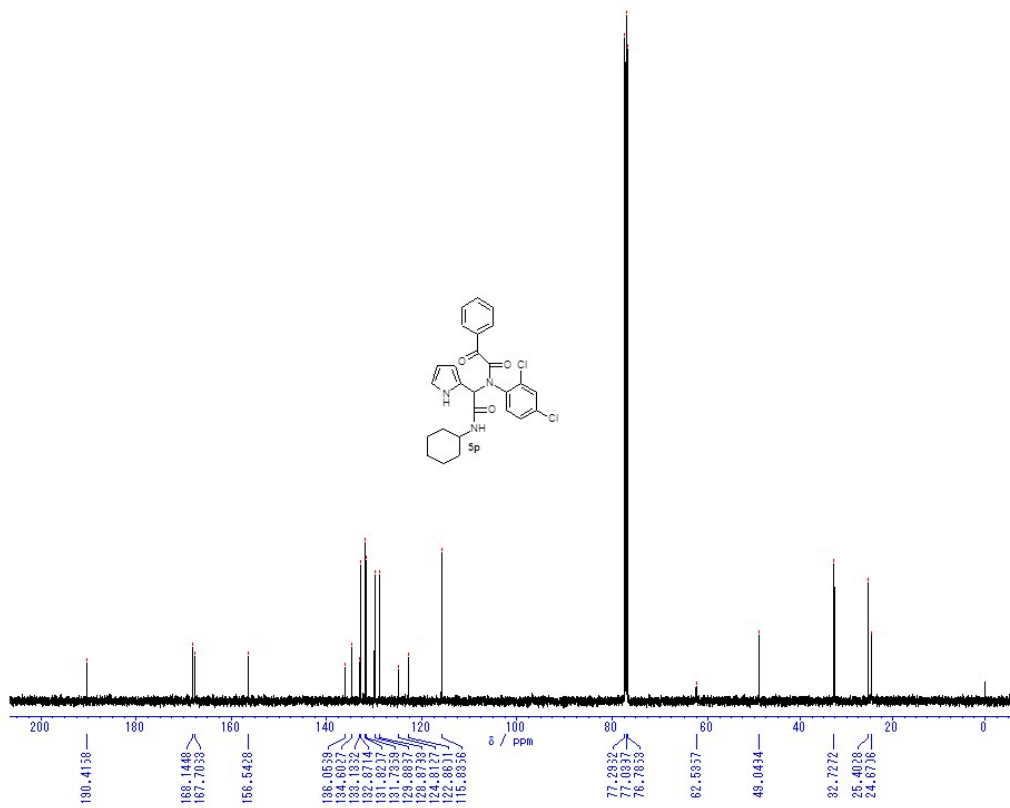

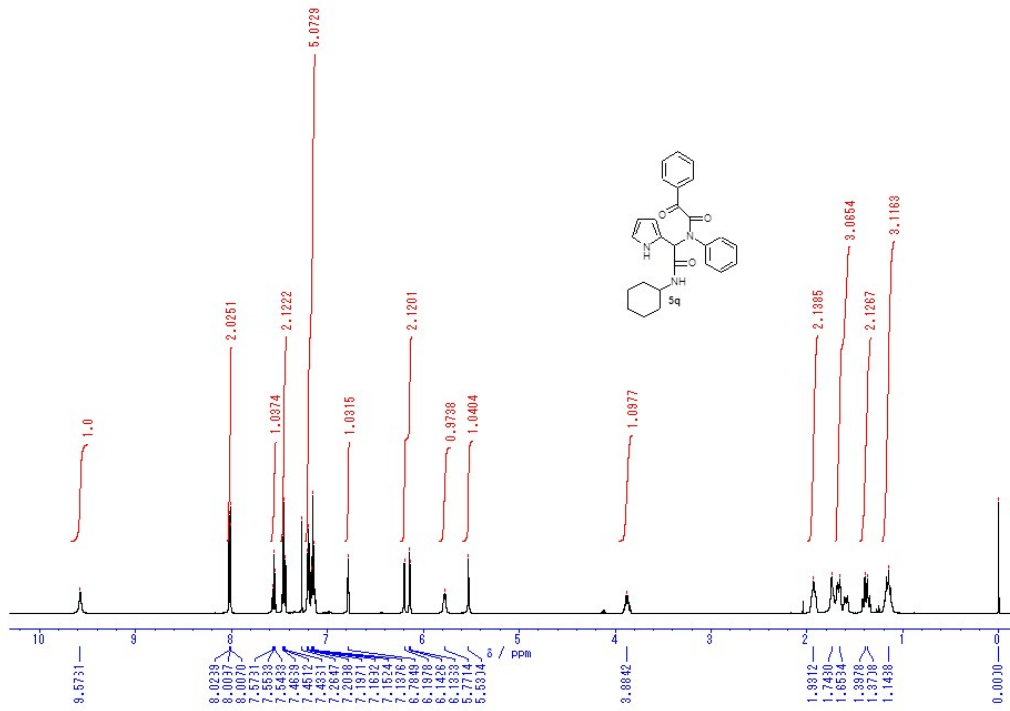

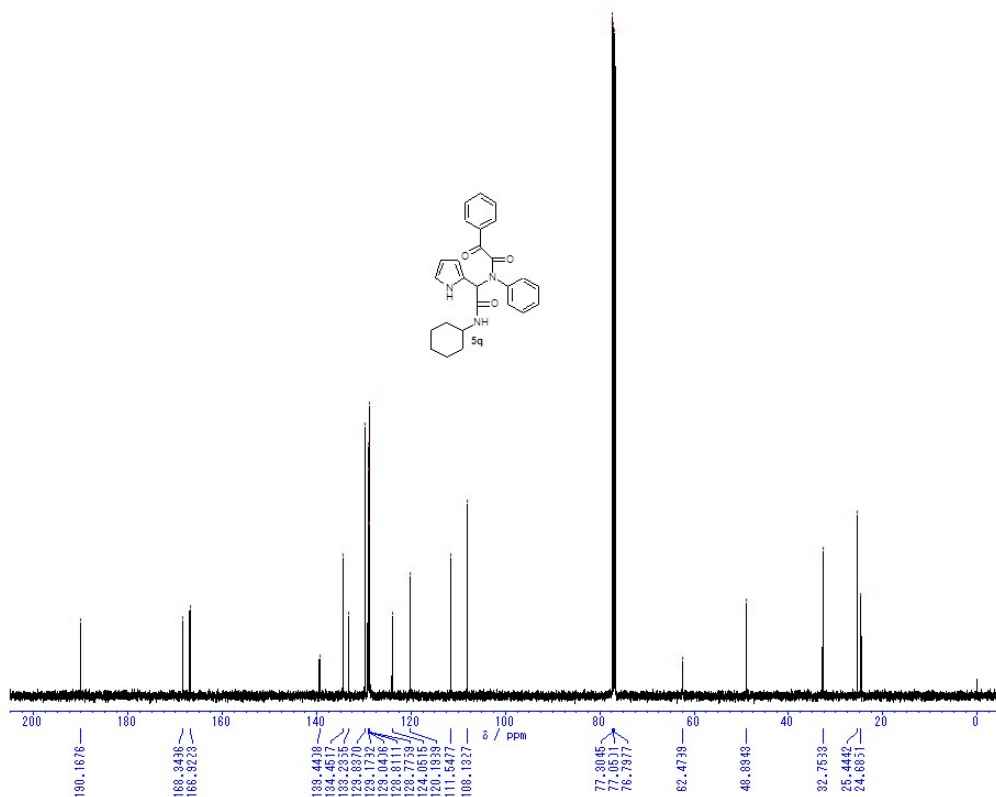

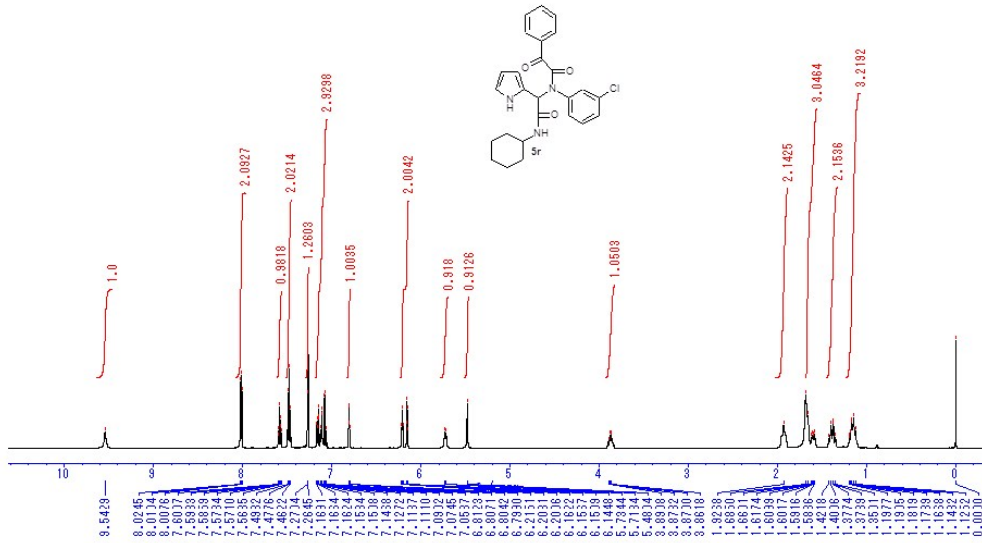

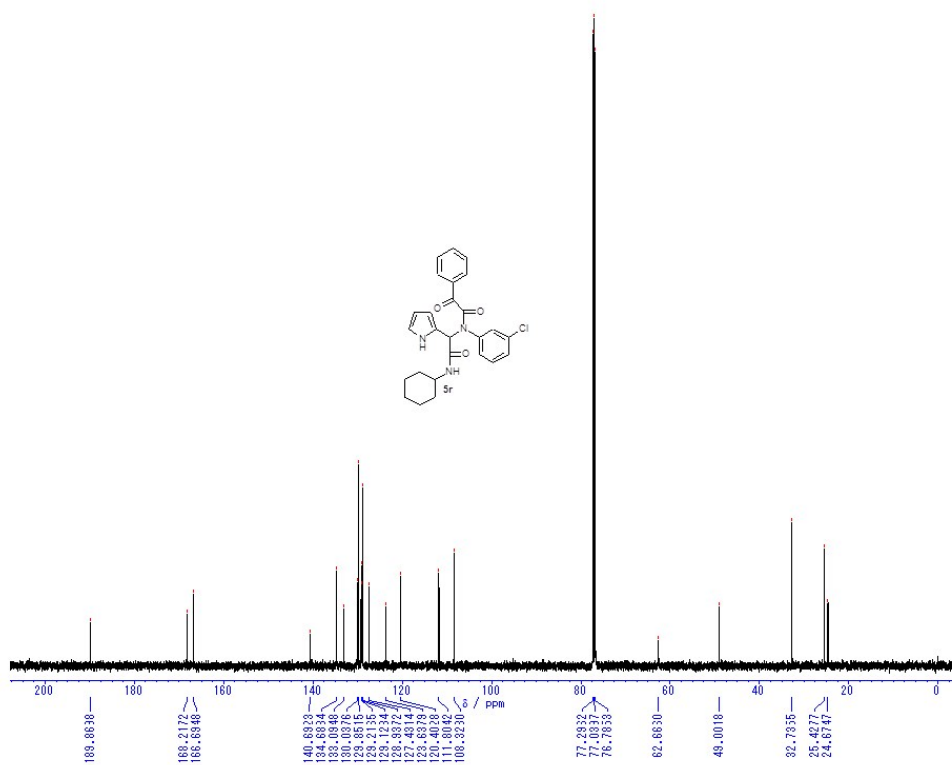

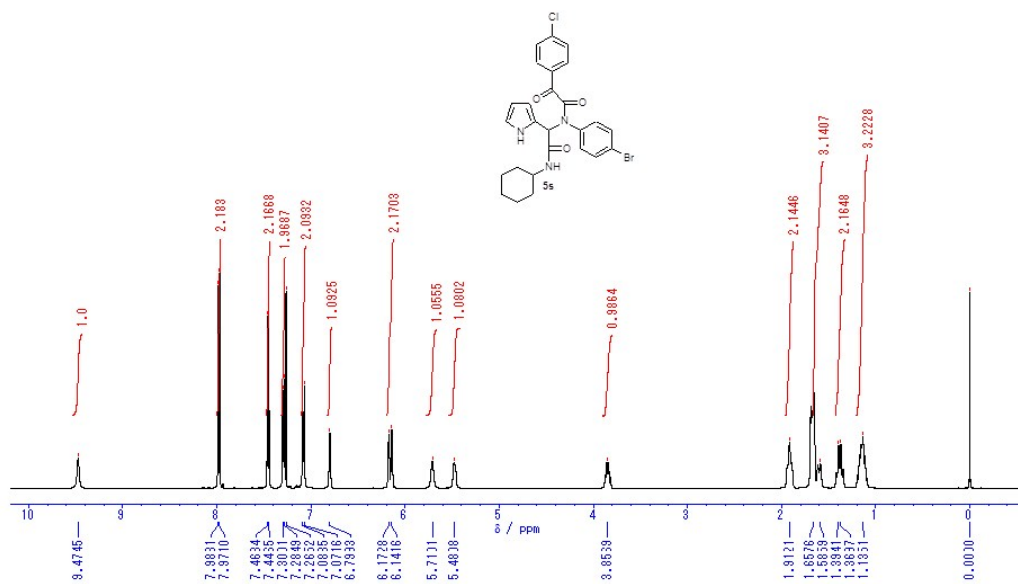



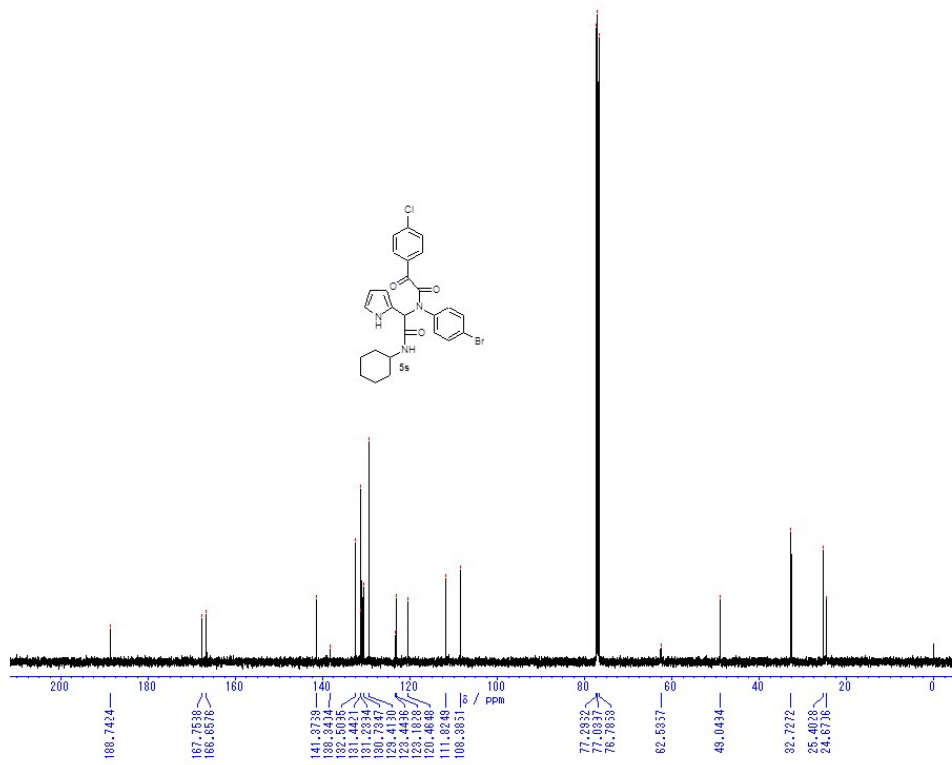



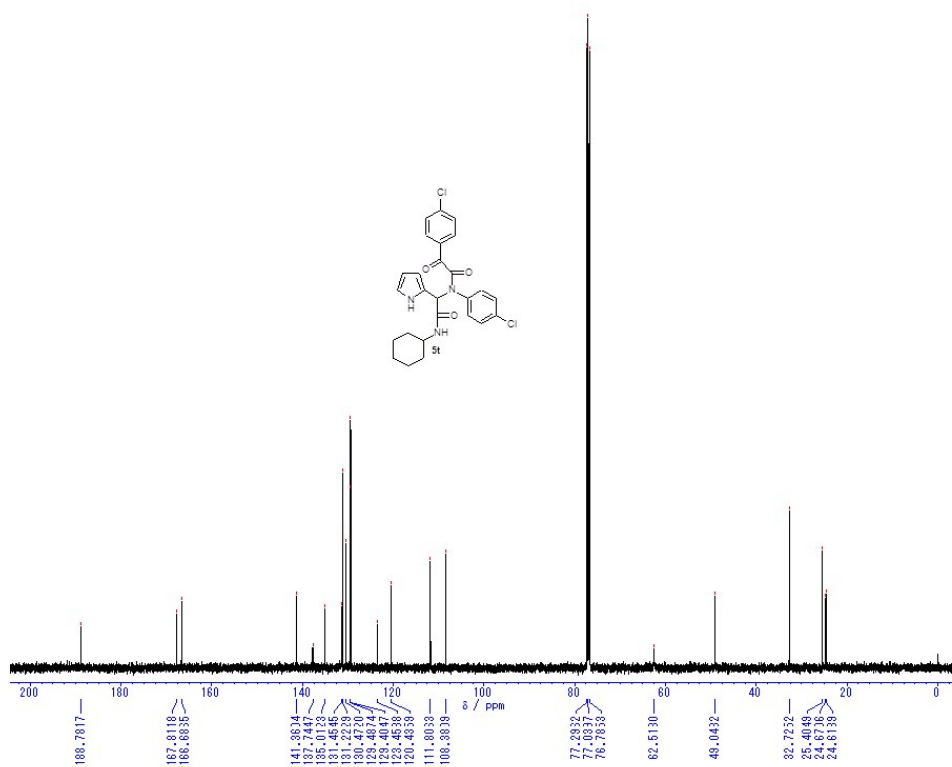

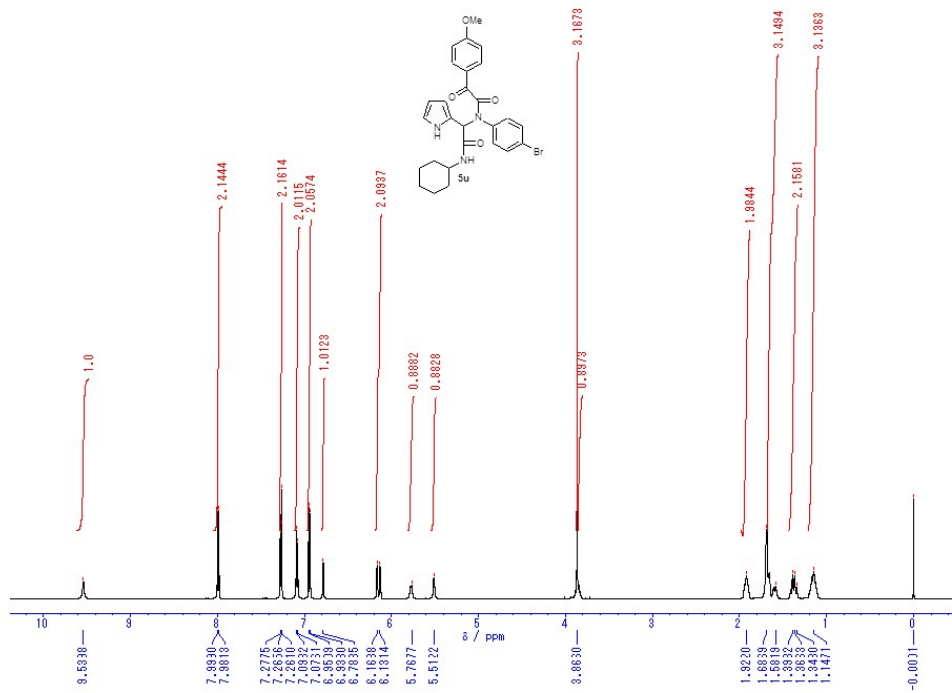

Star

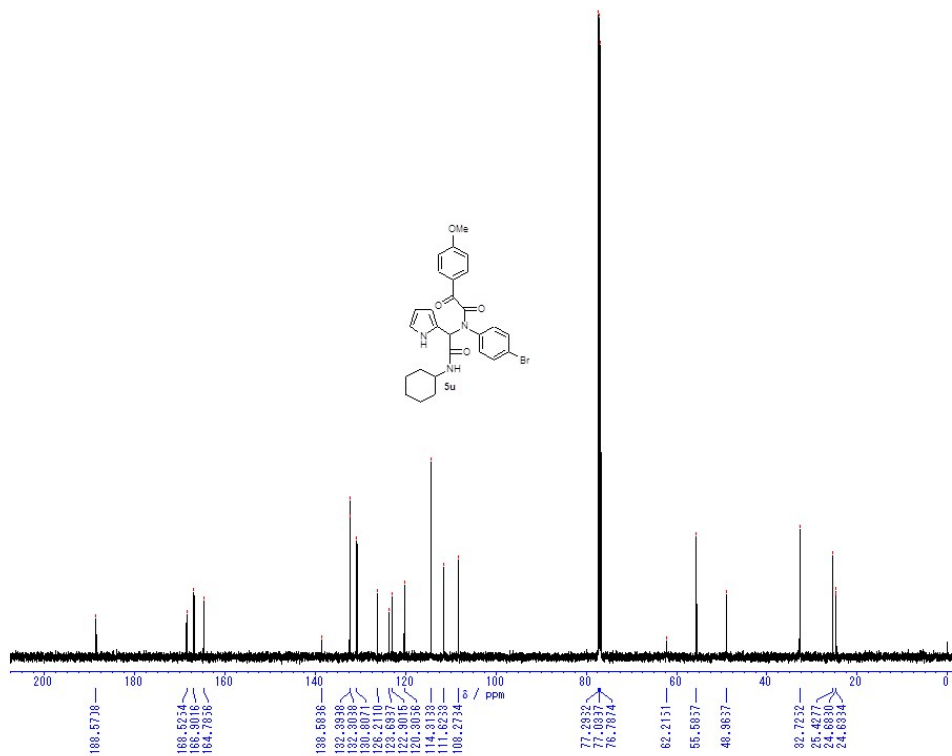

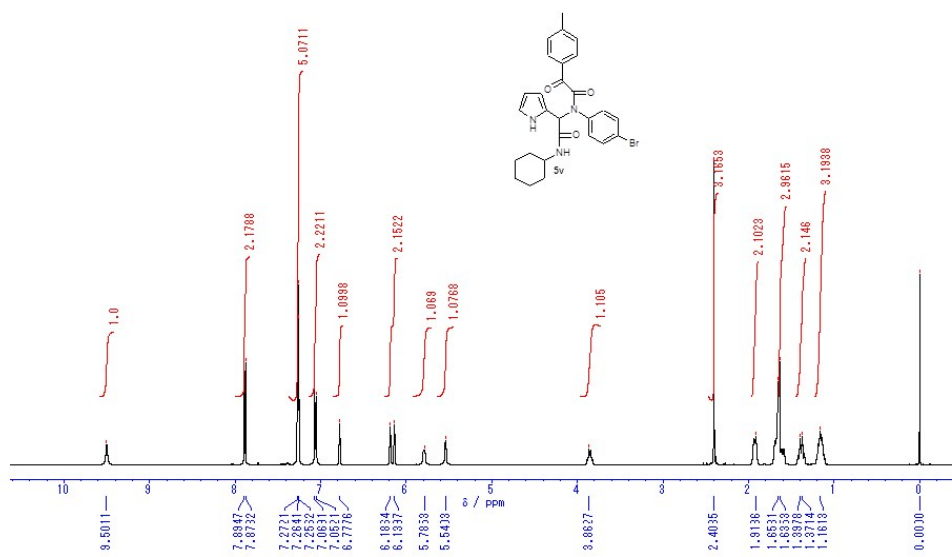

Star

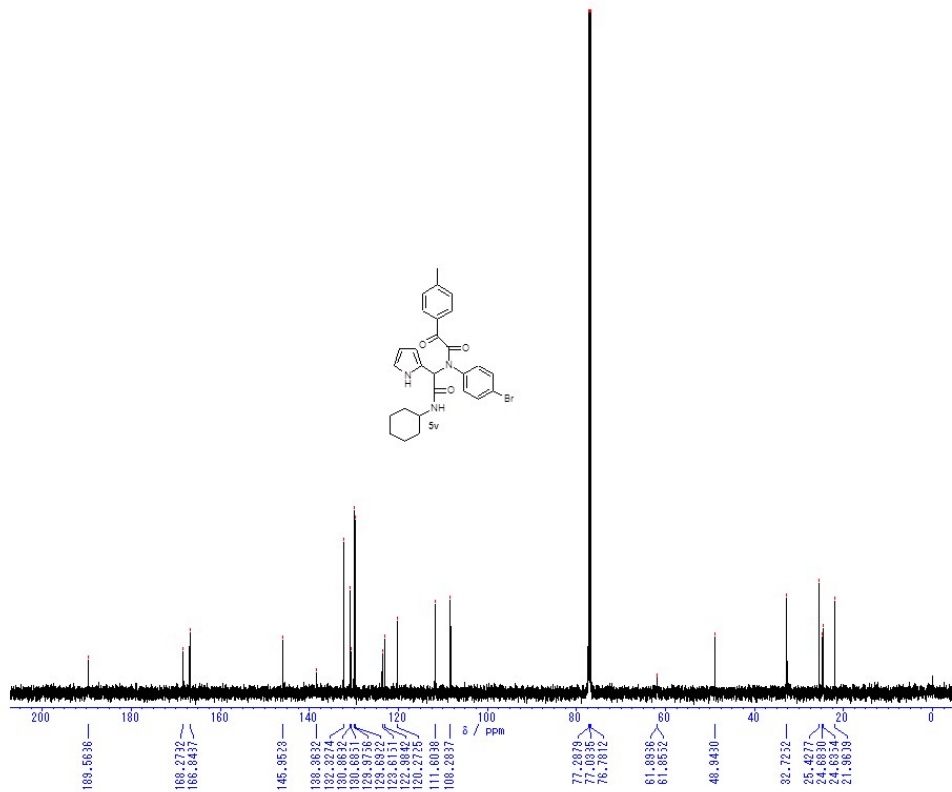

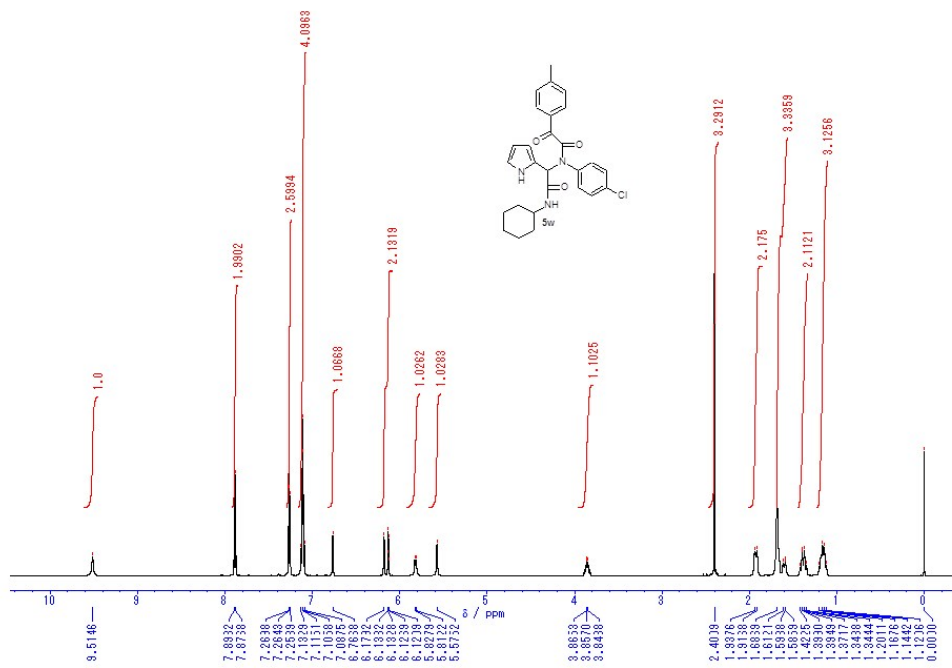

Star



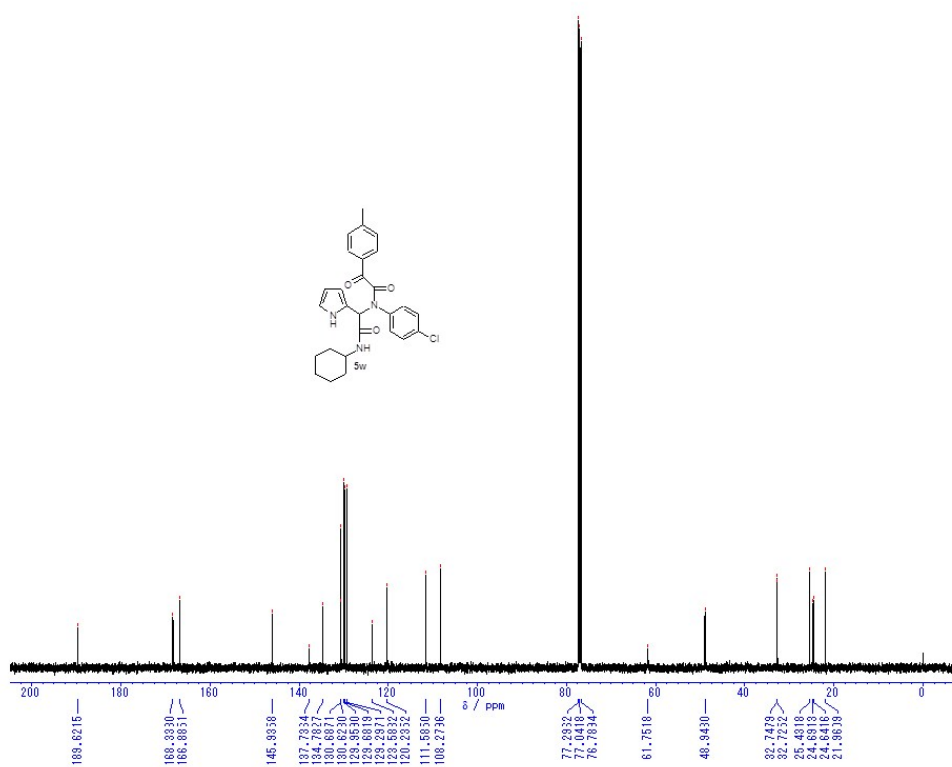

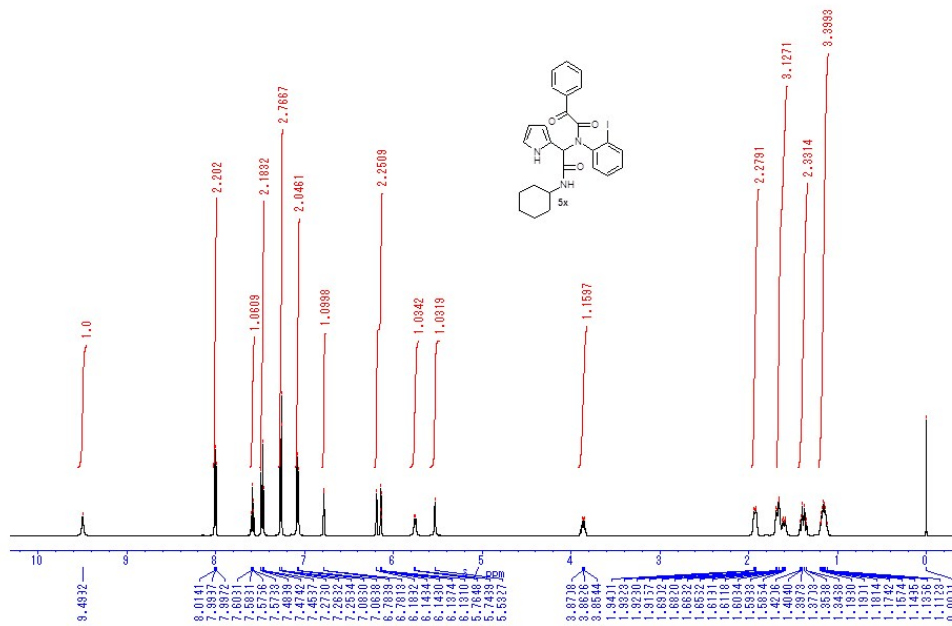

Star

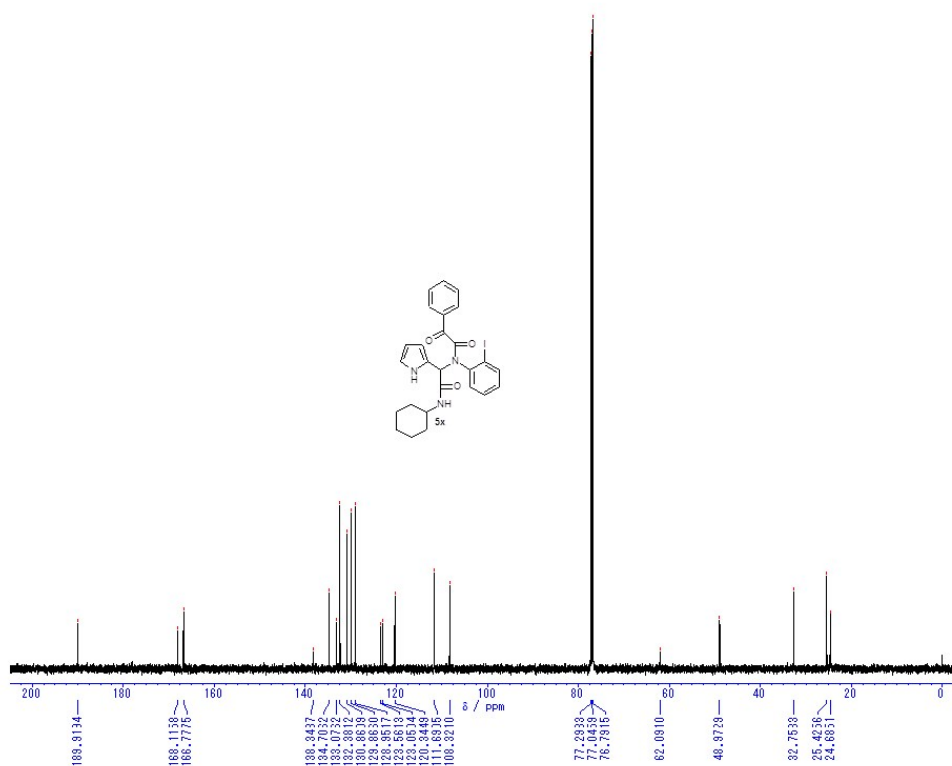

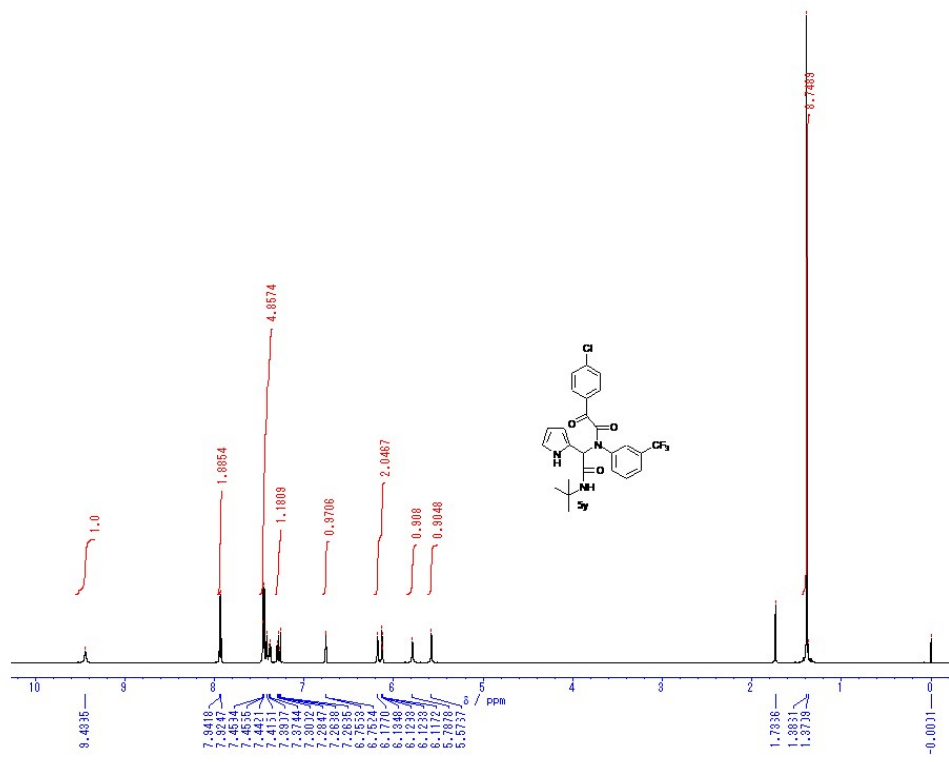

Star

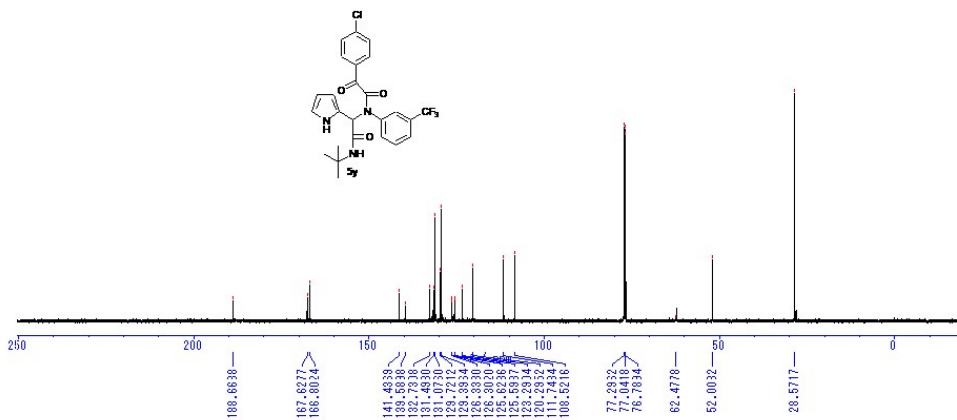

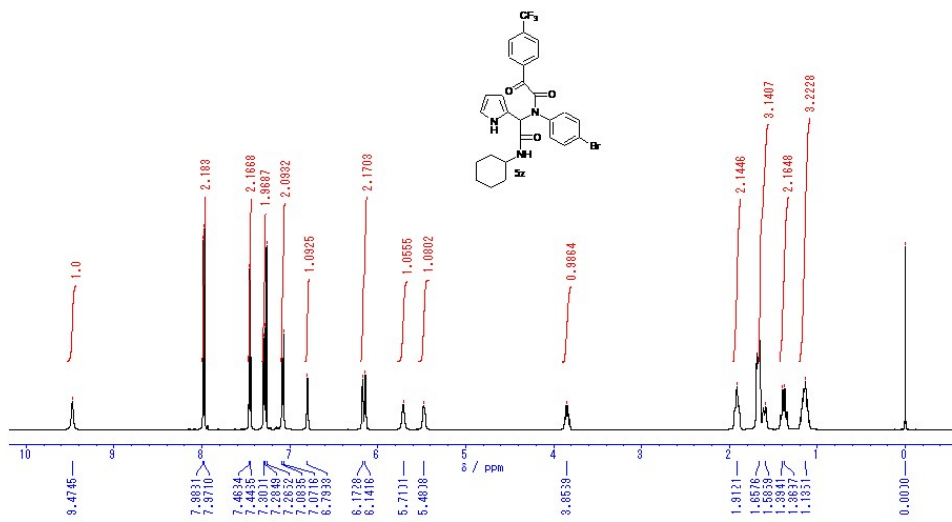

Star

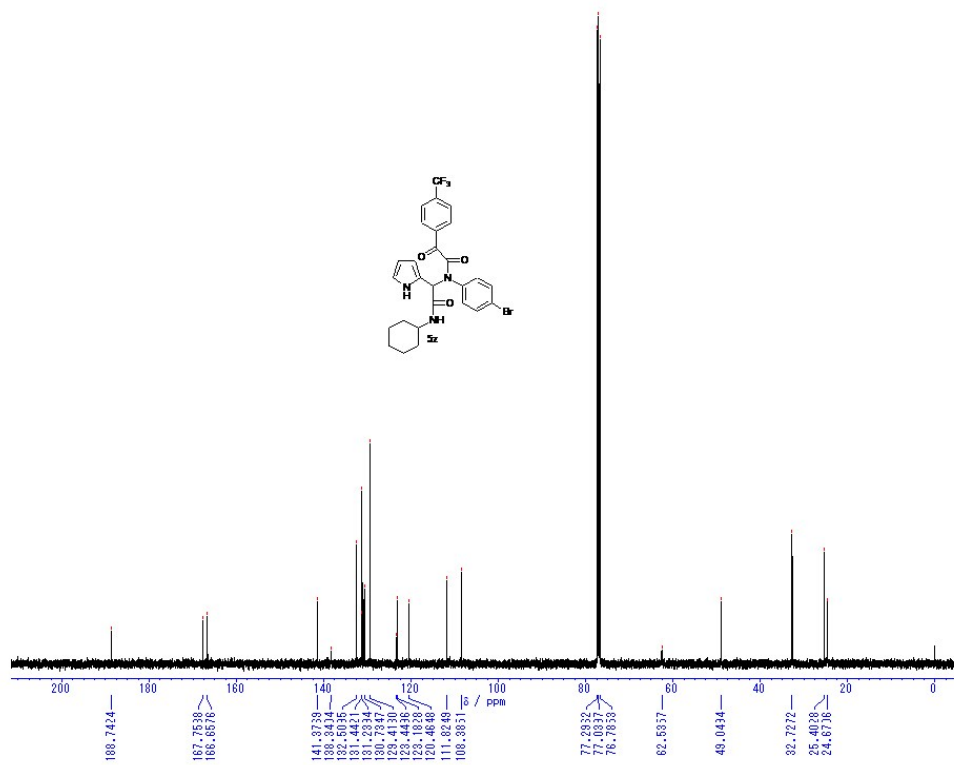

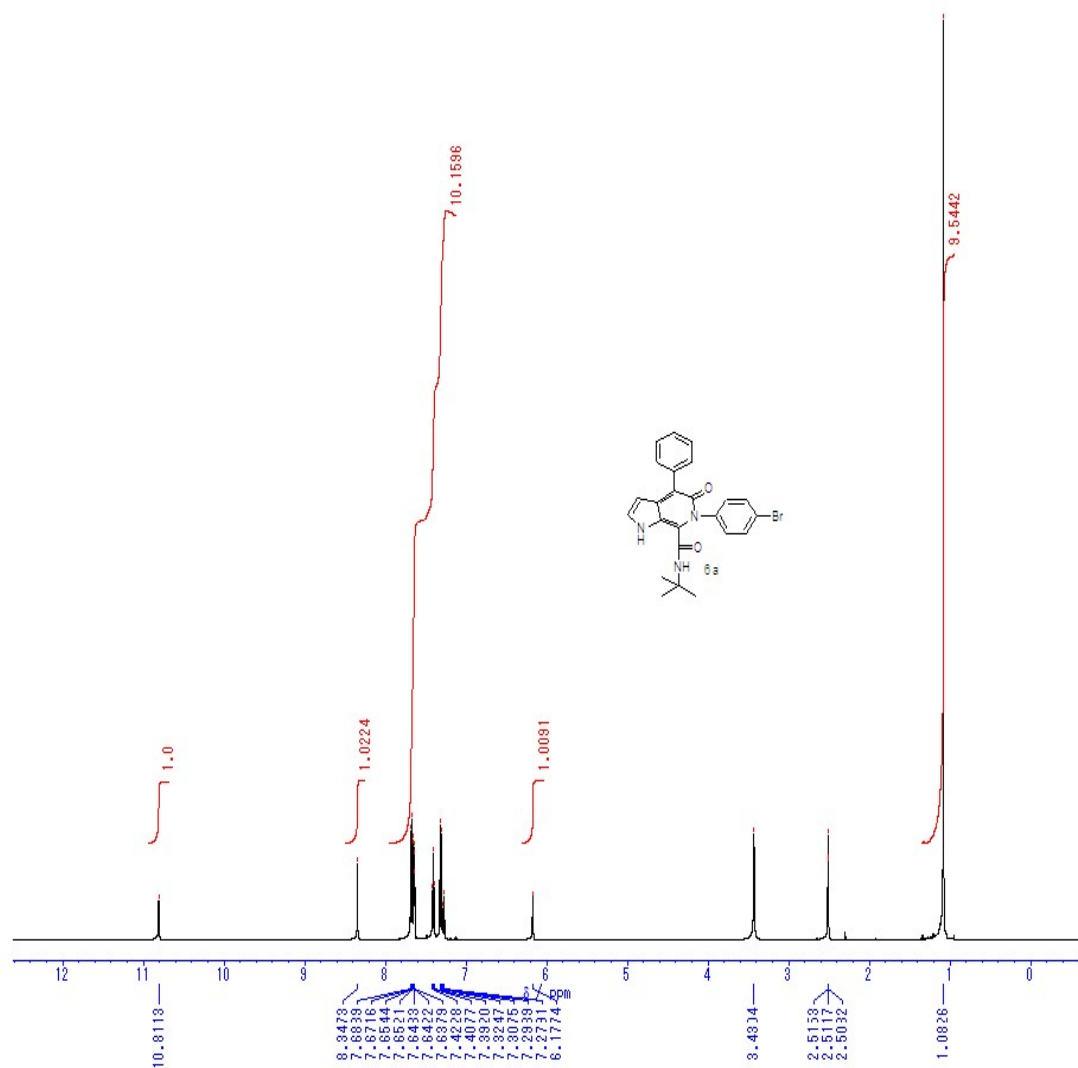



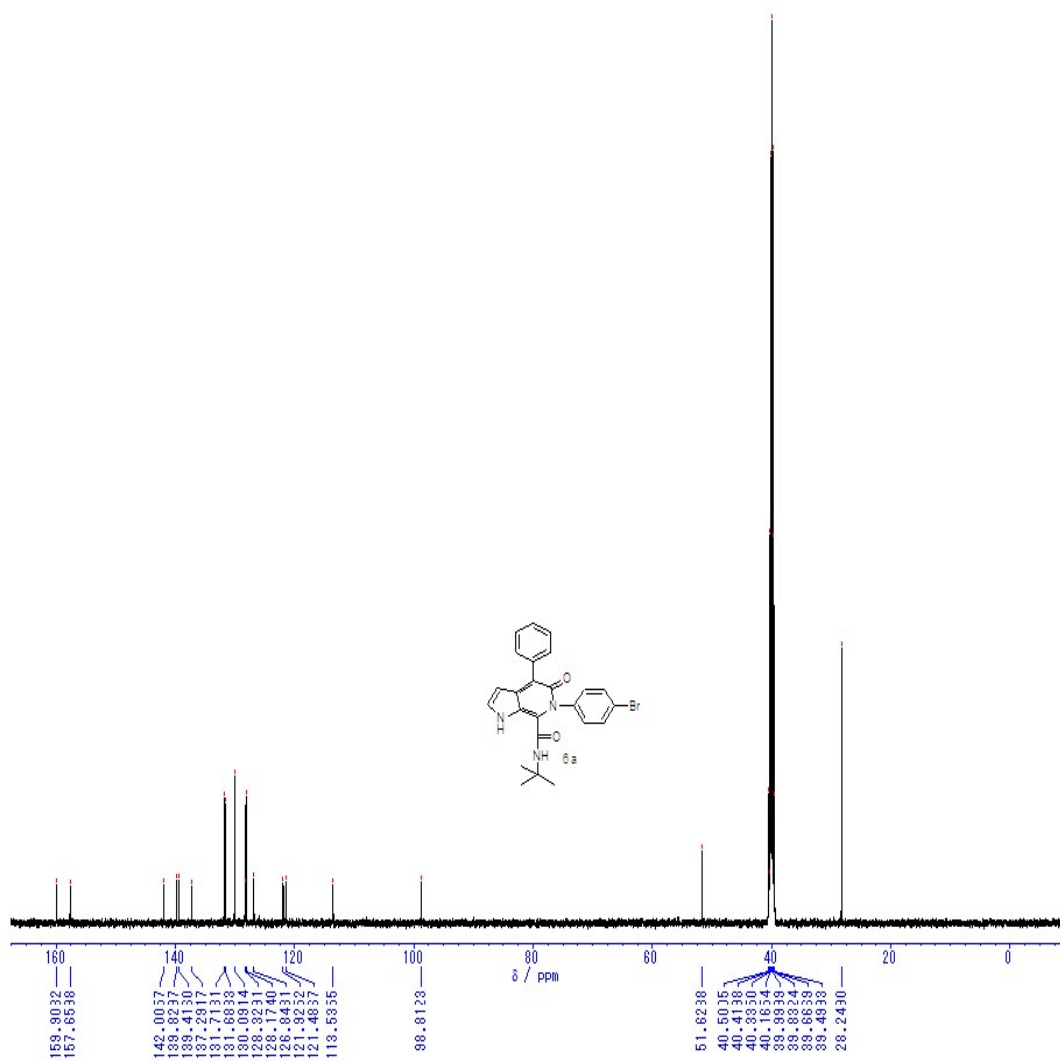

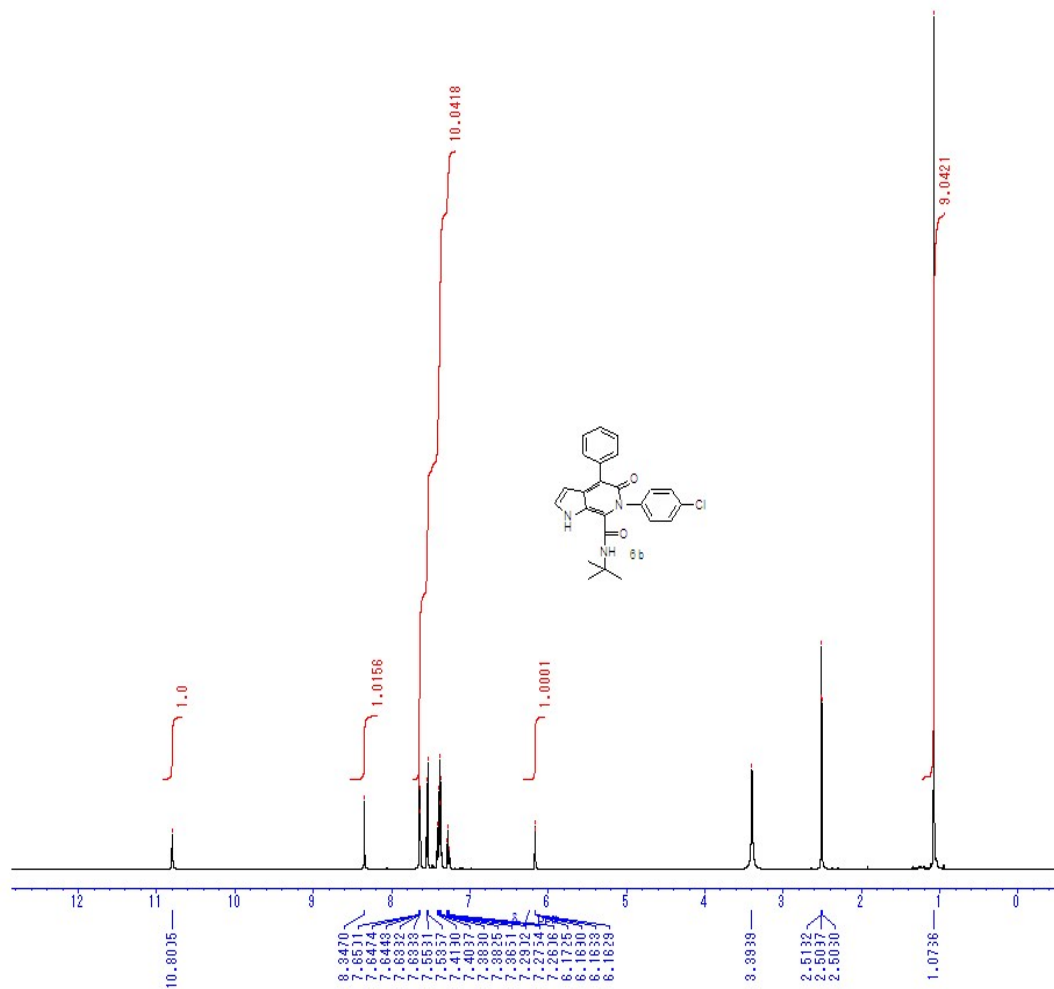

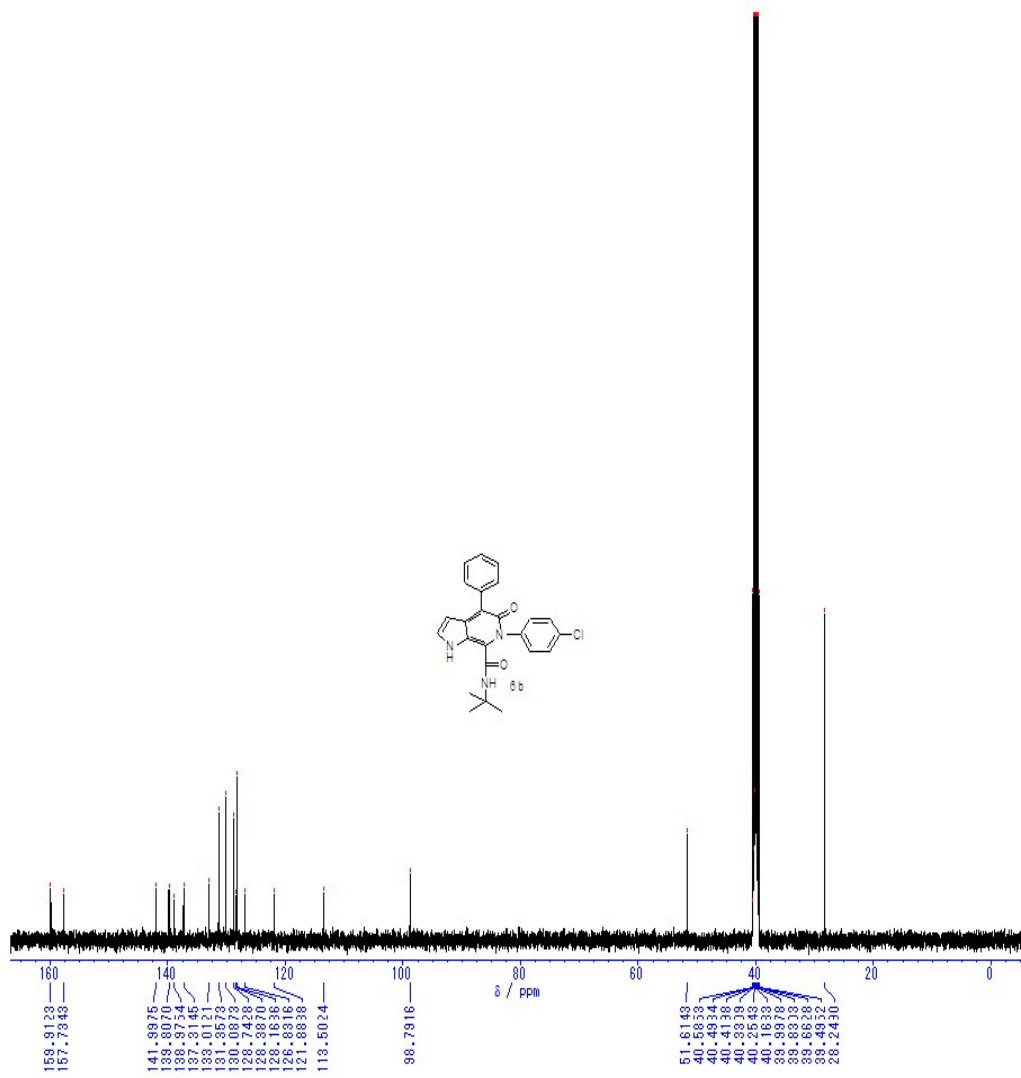

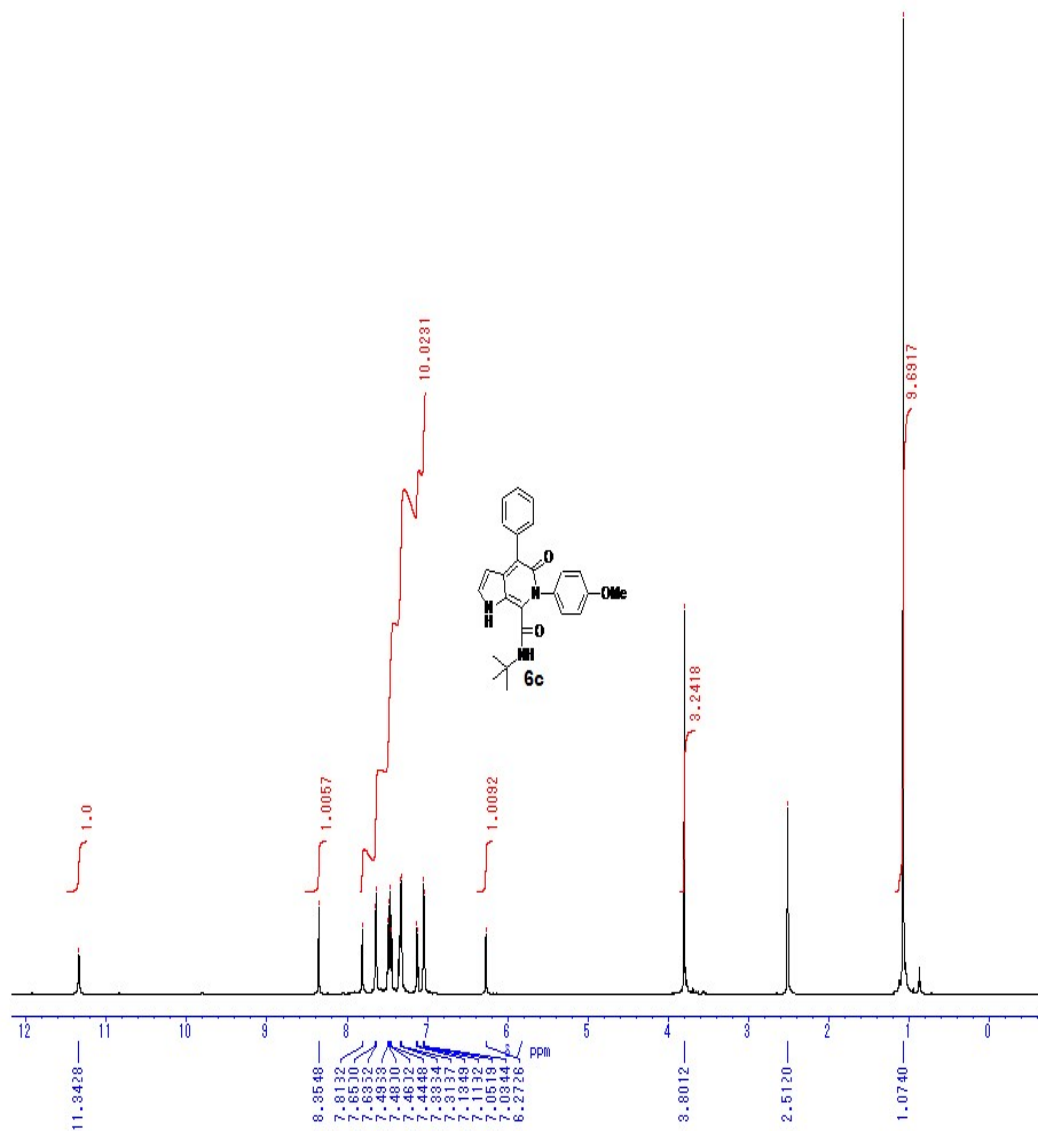

Star

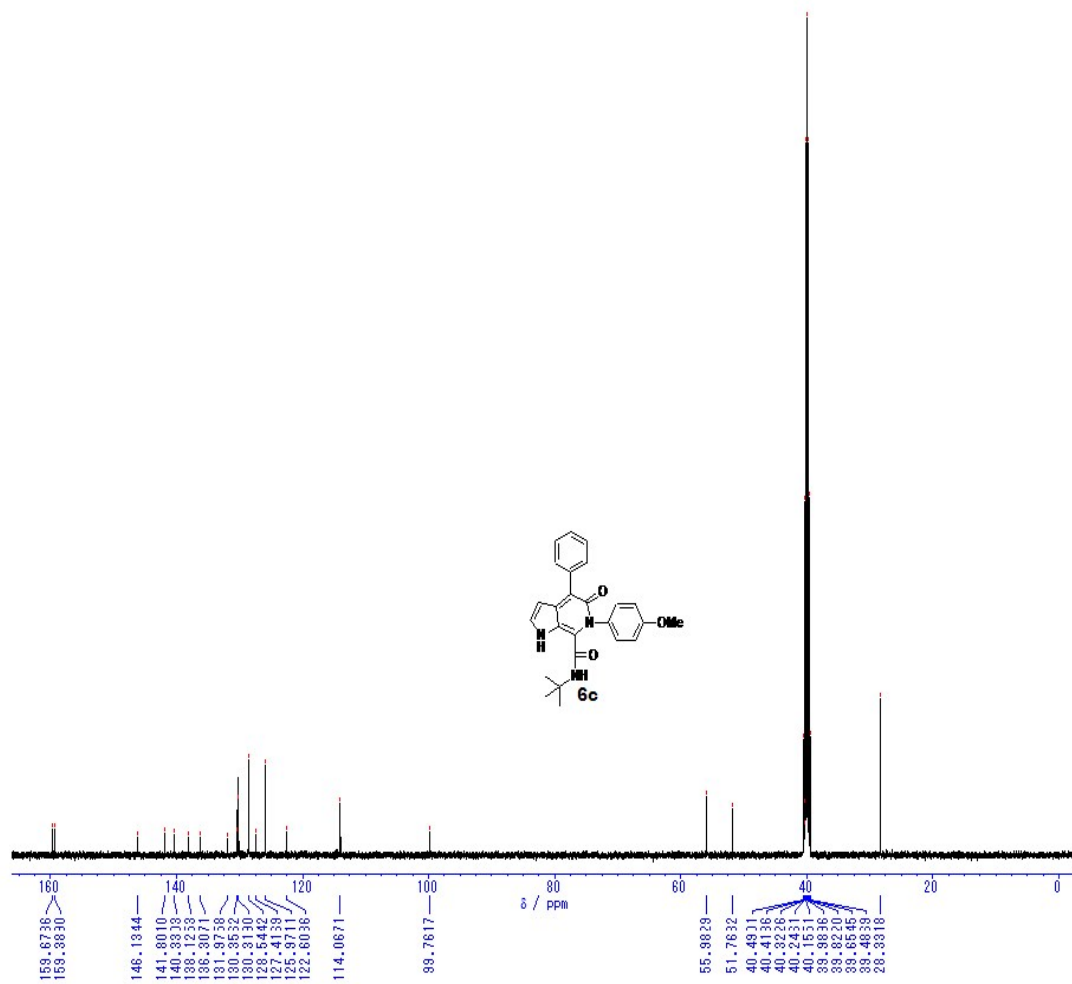

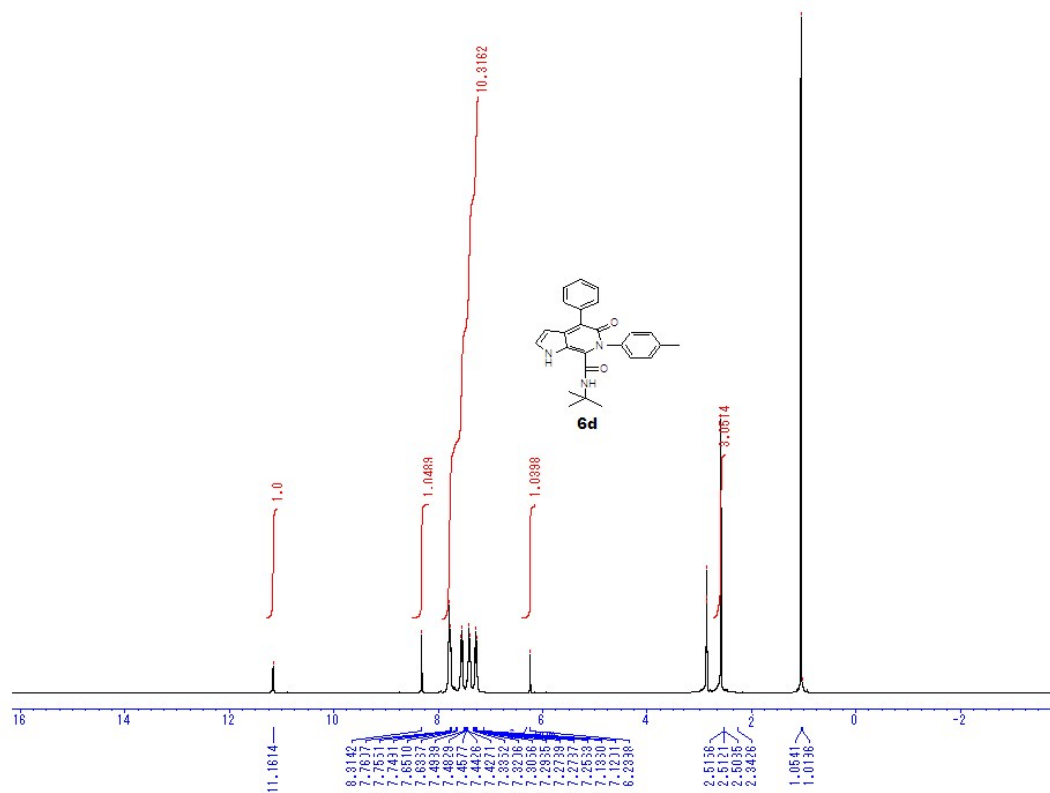

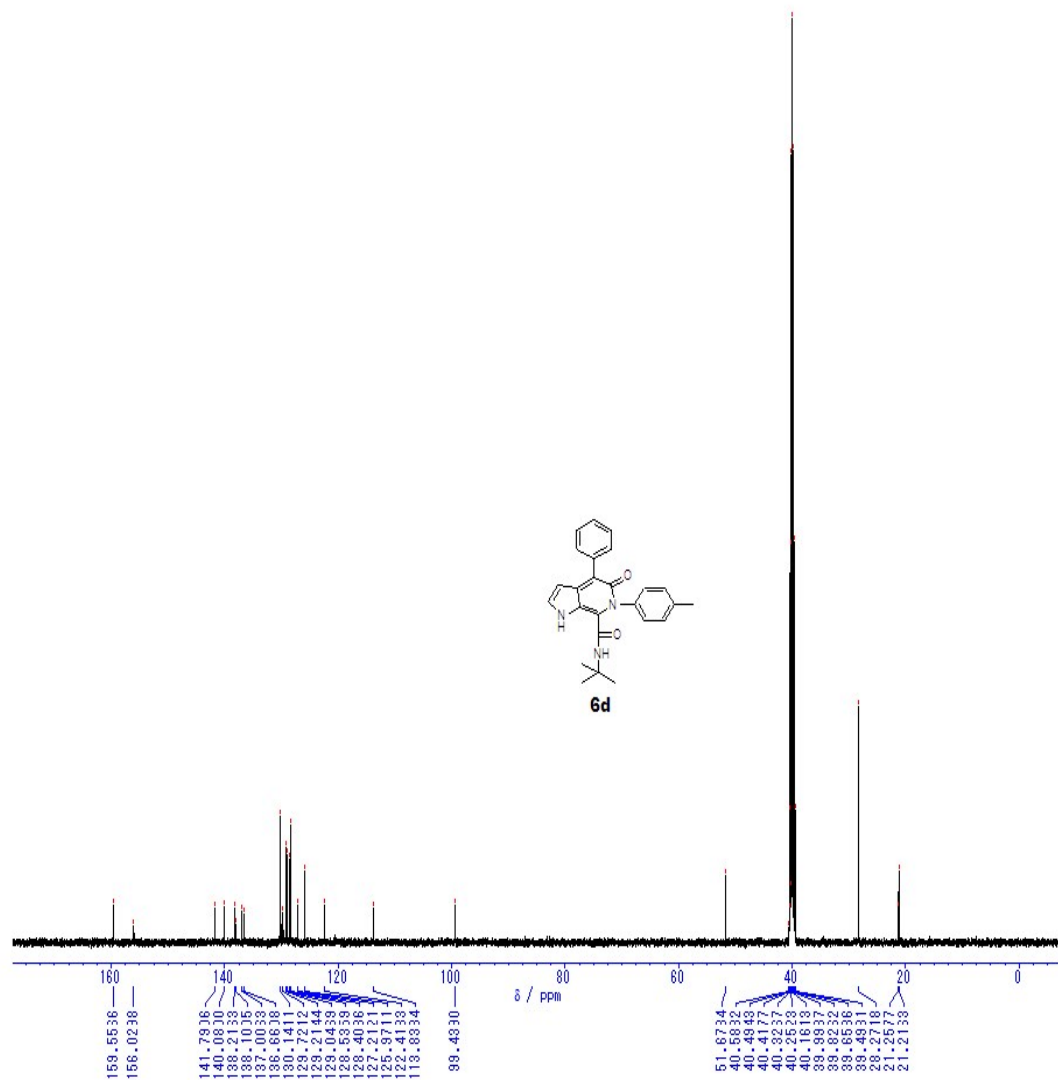

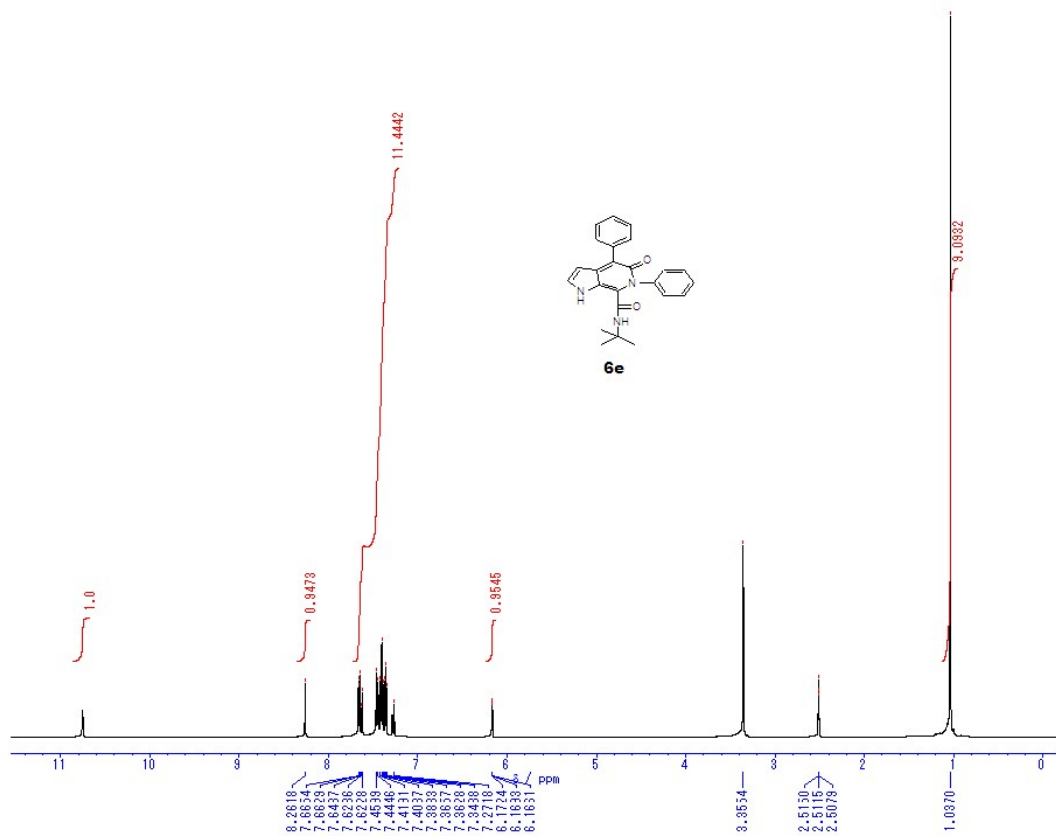



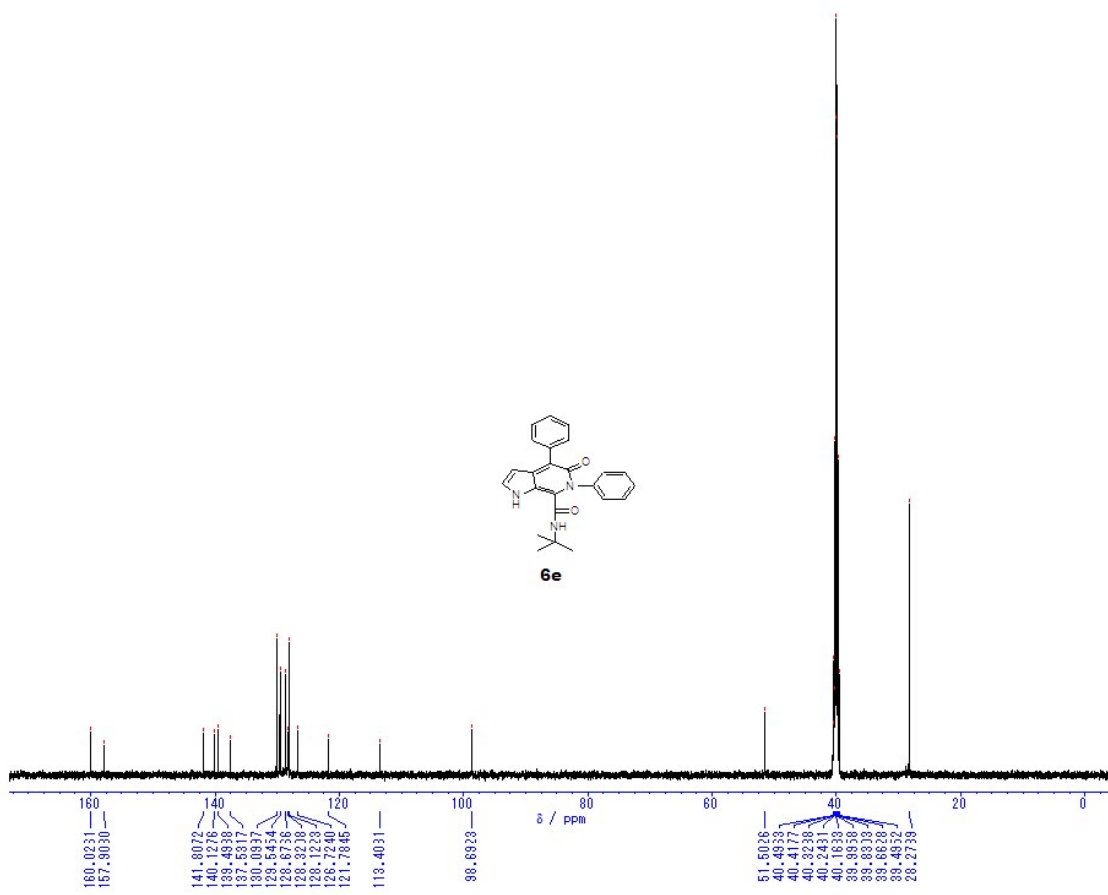

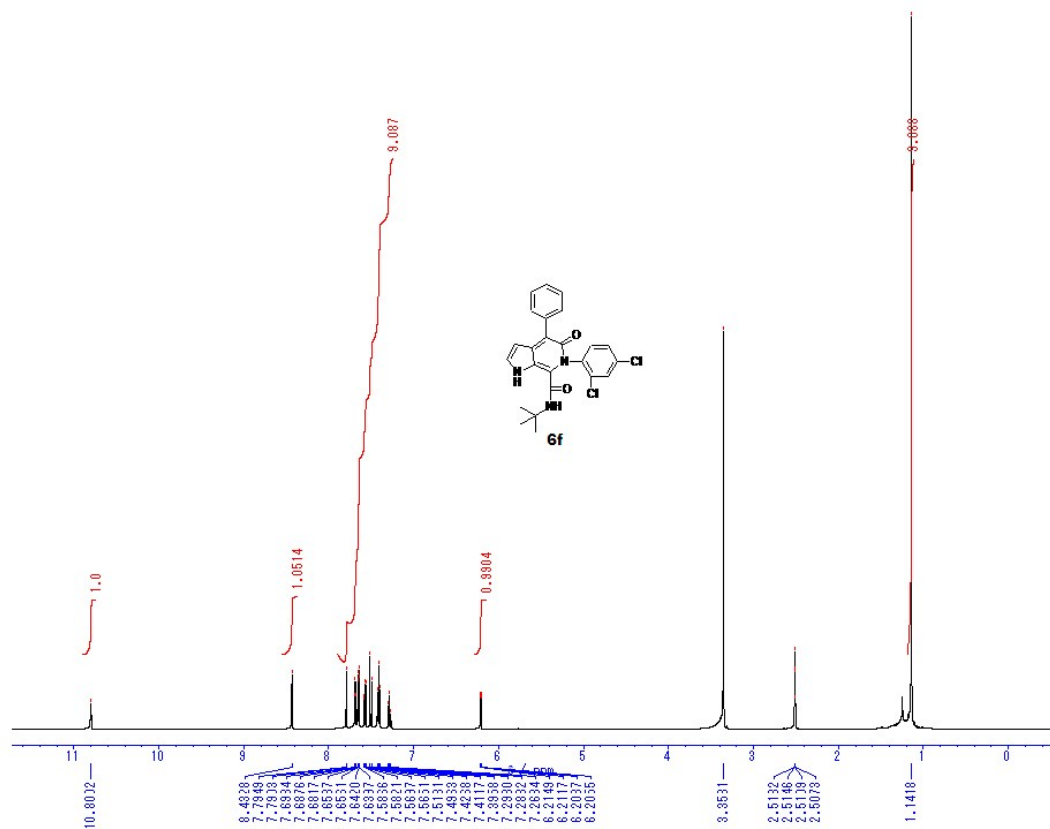

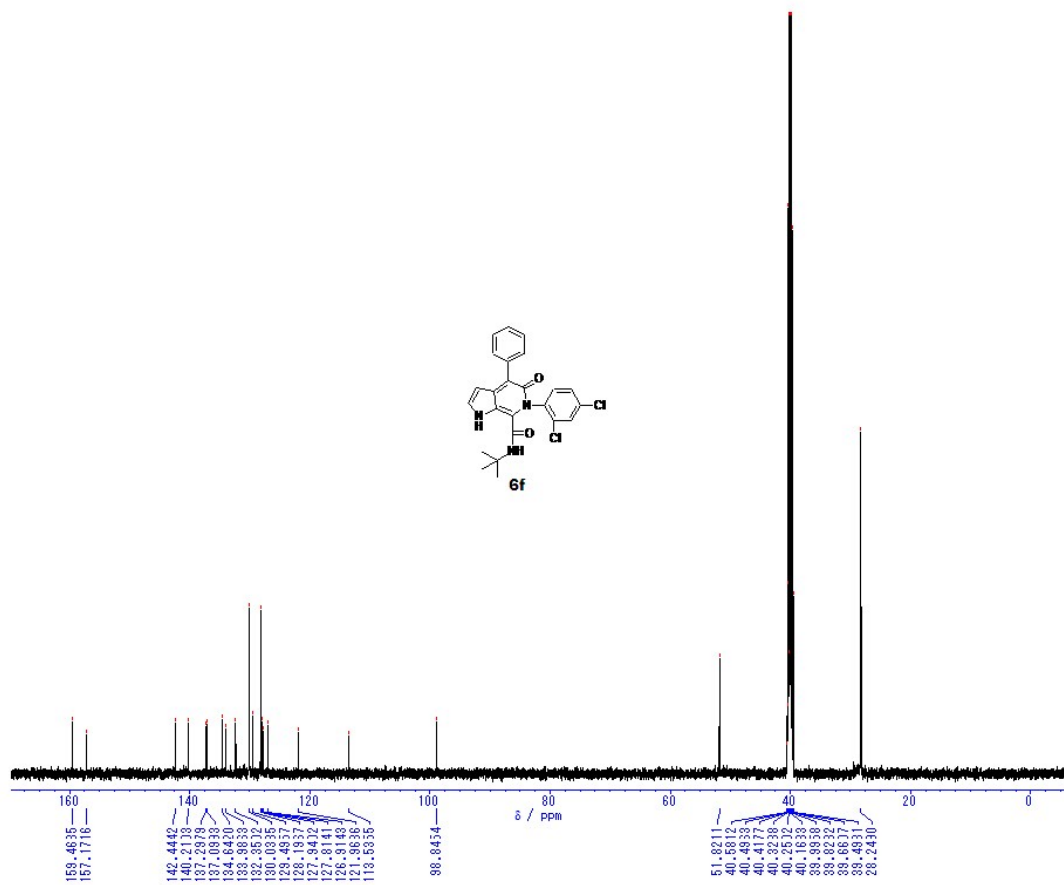

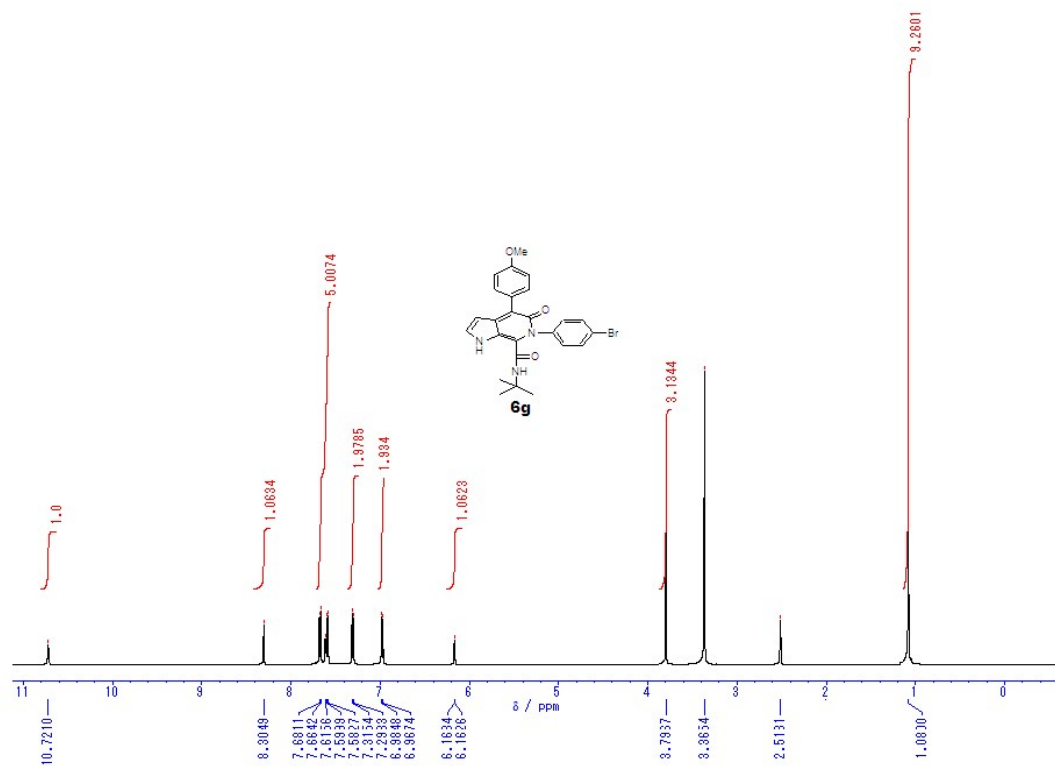

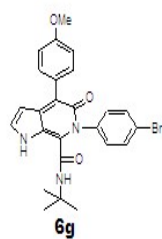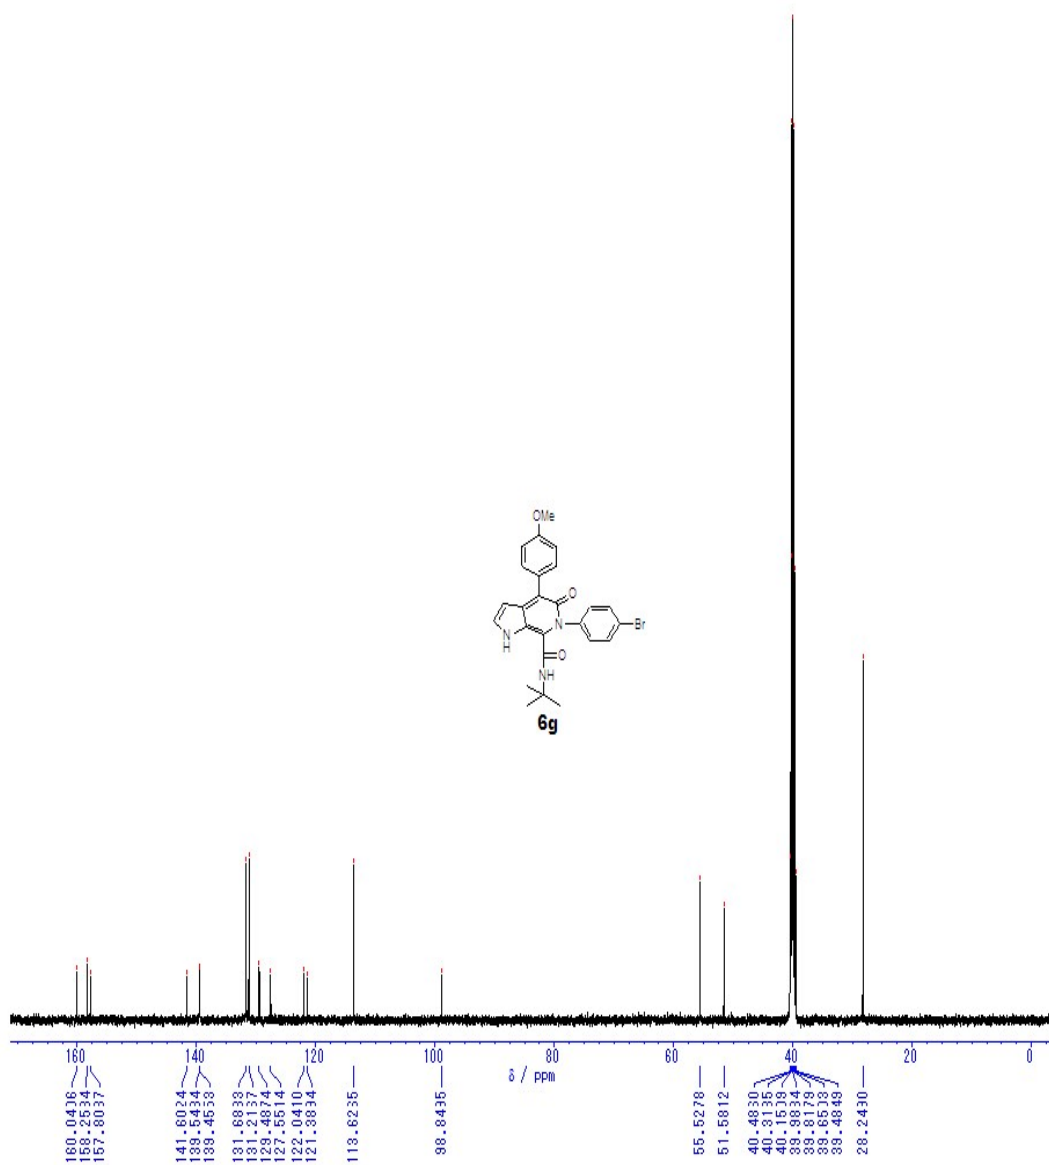

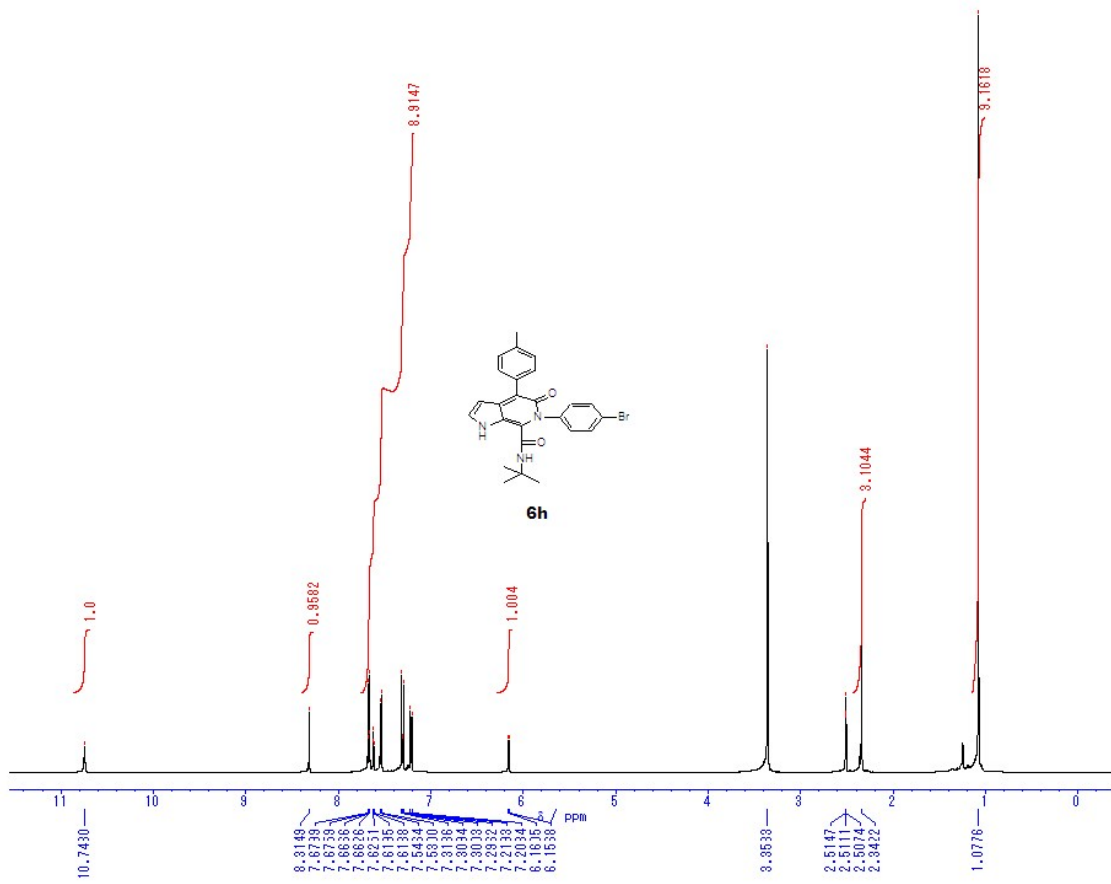

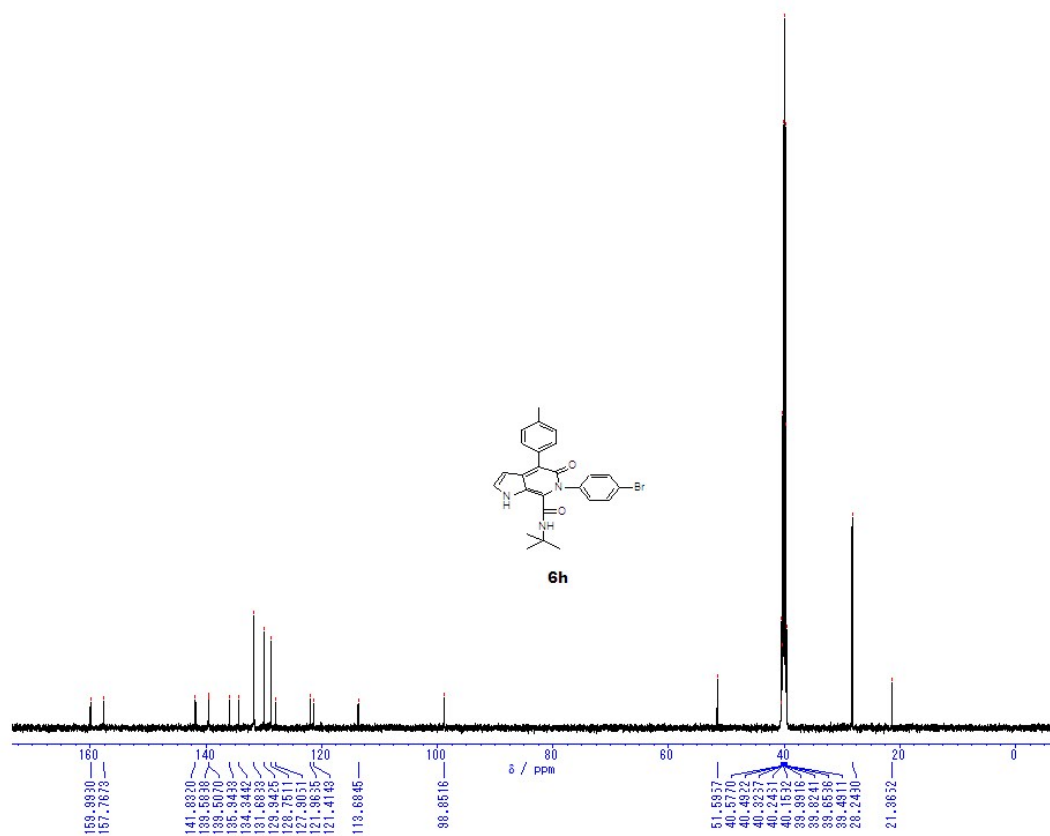

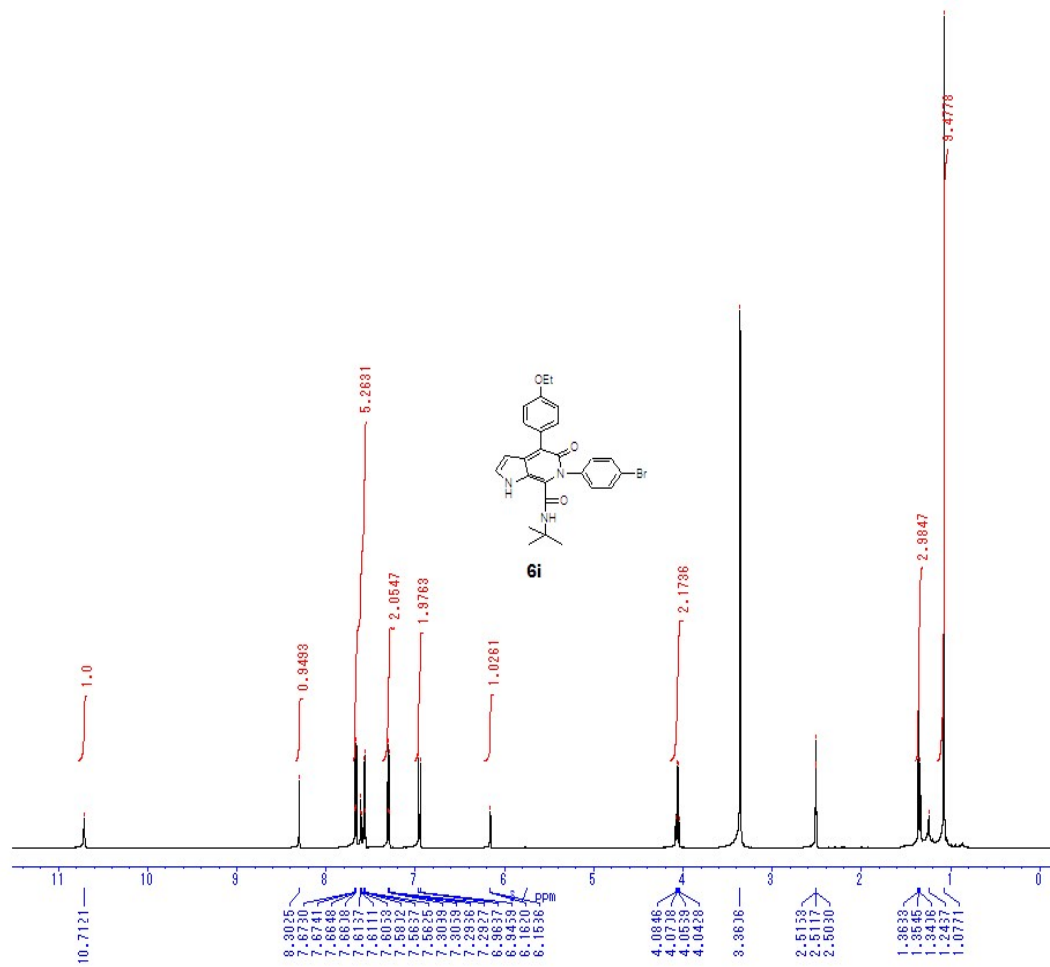



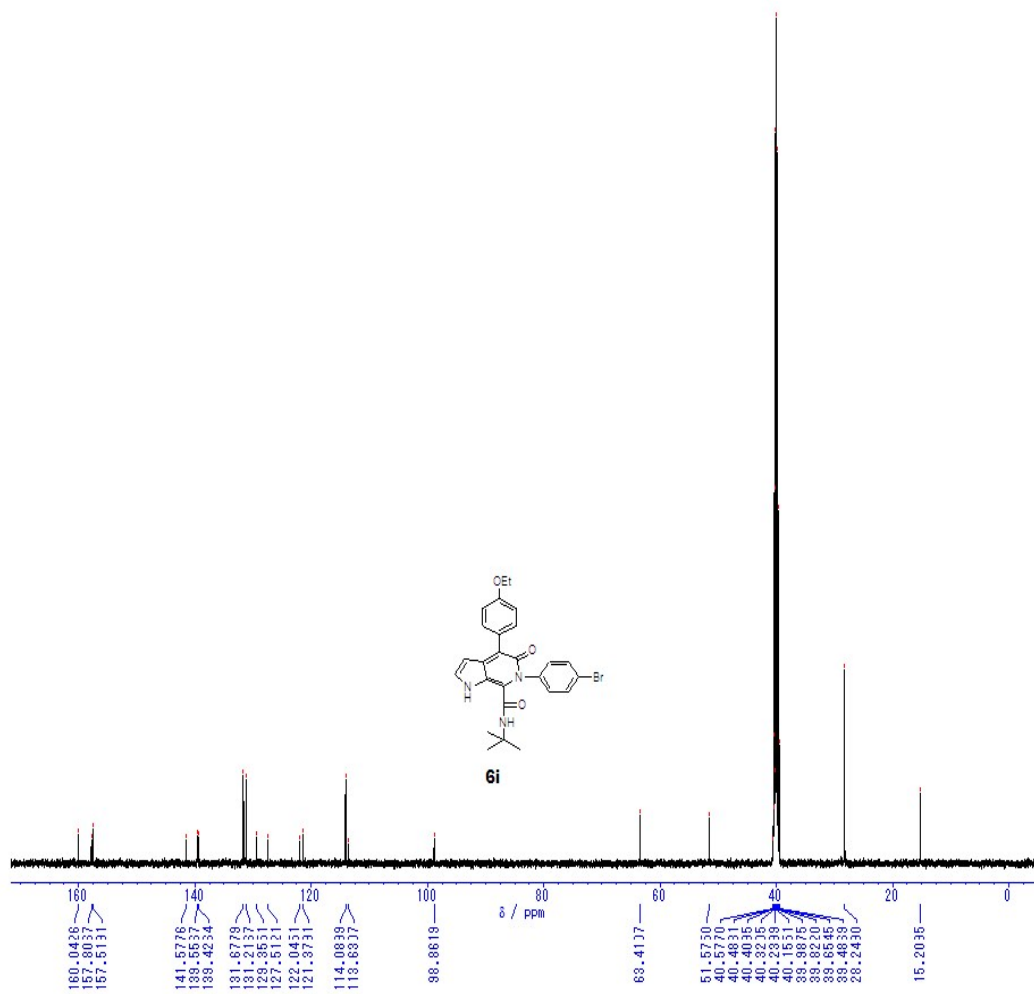

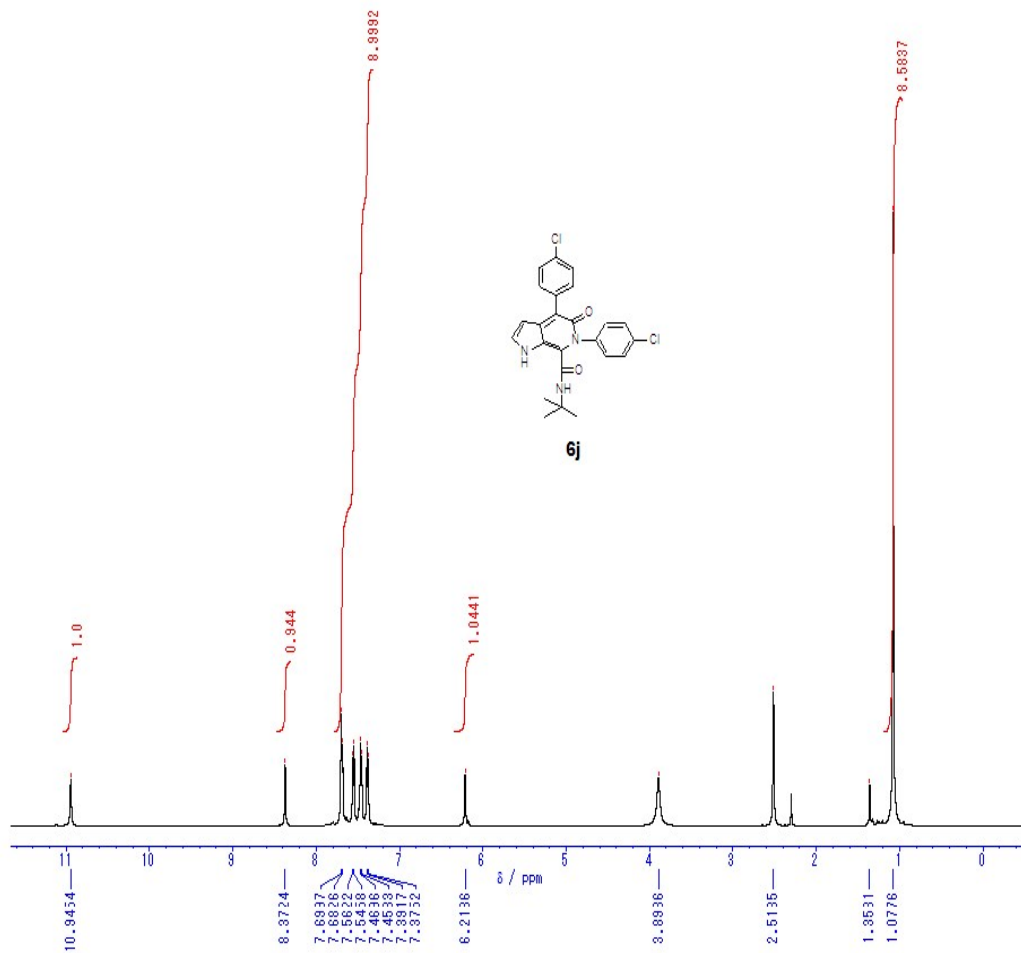

Star

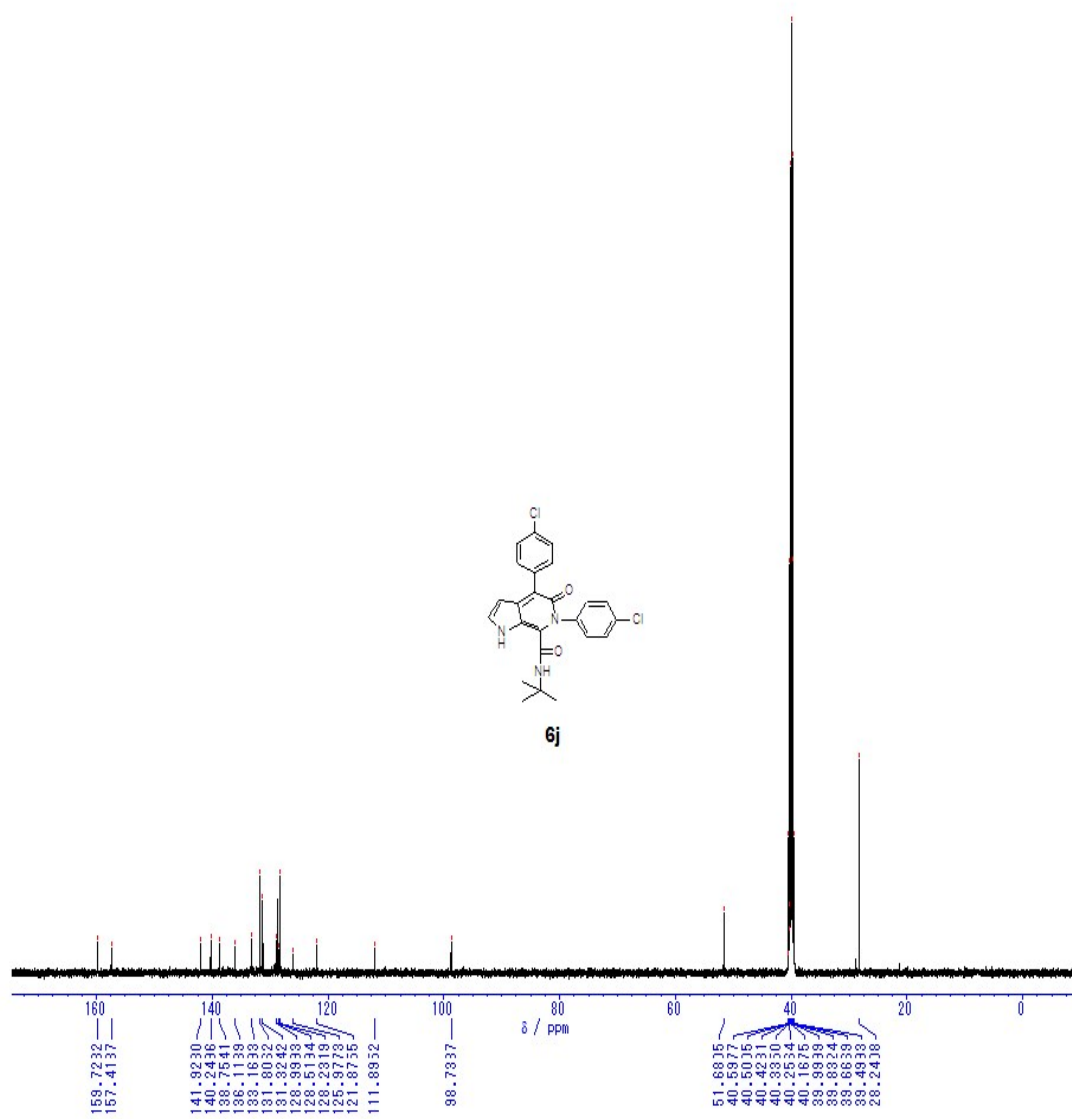

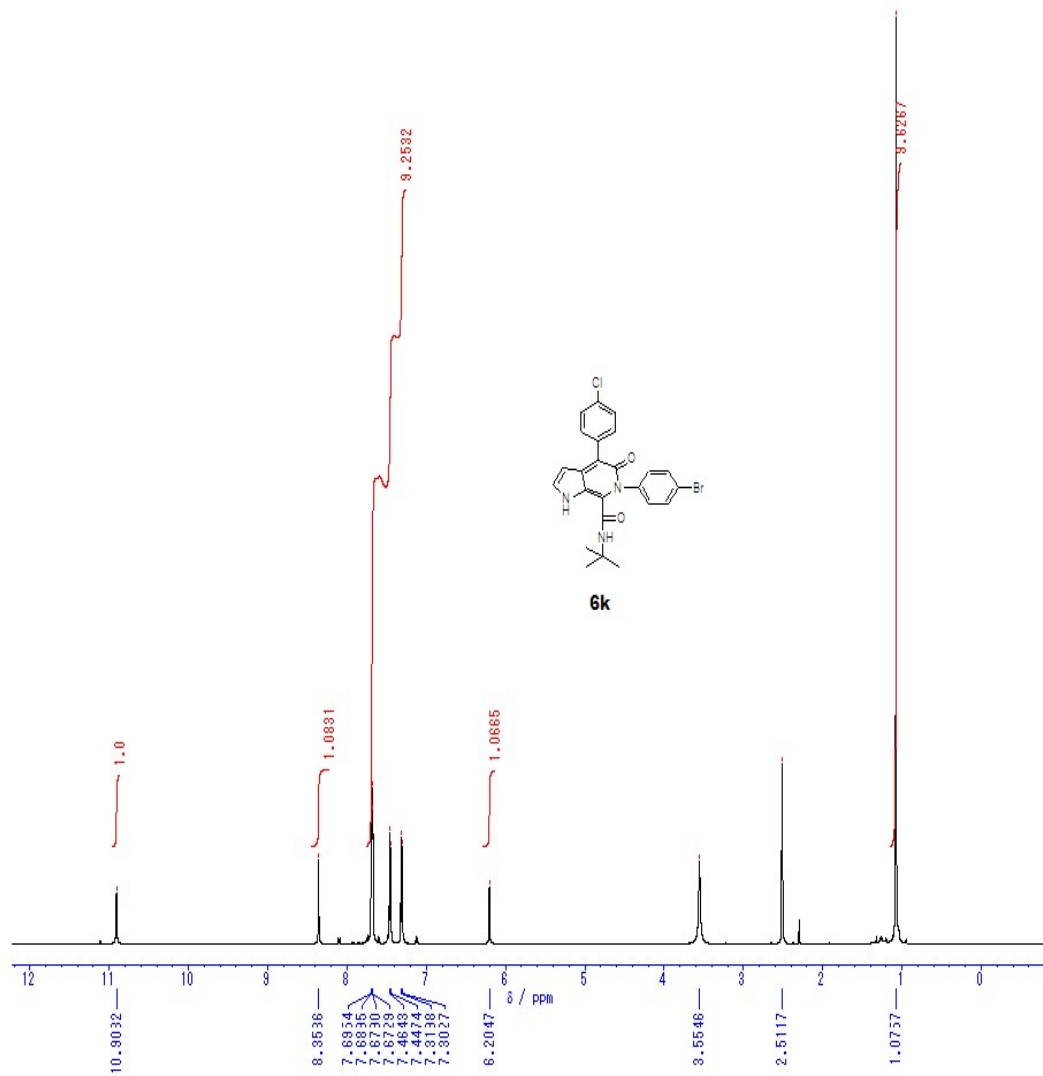

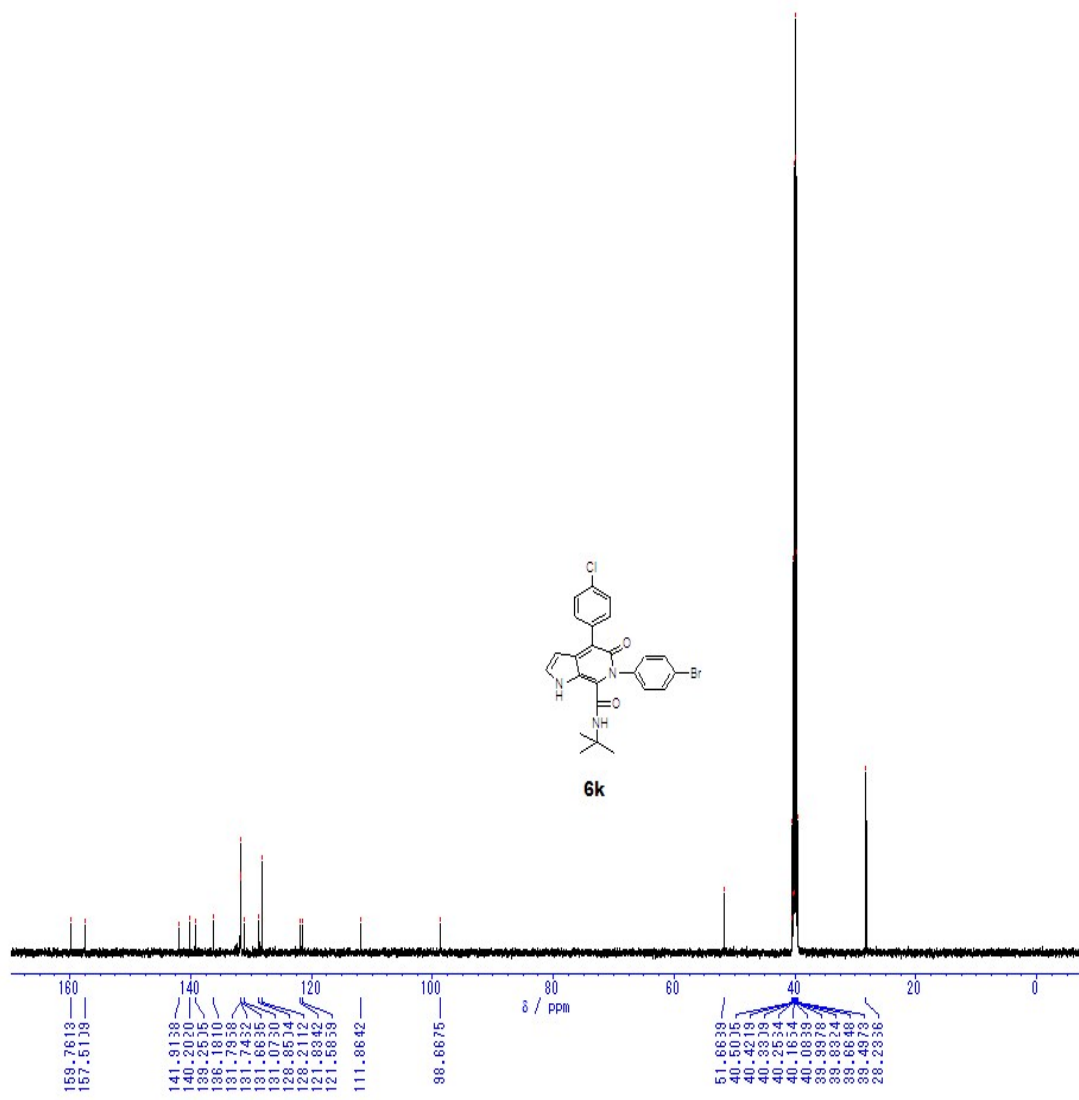

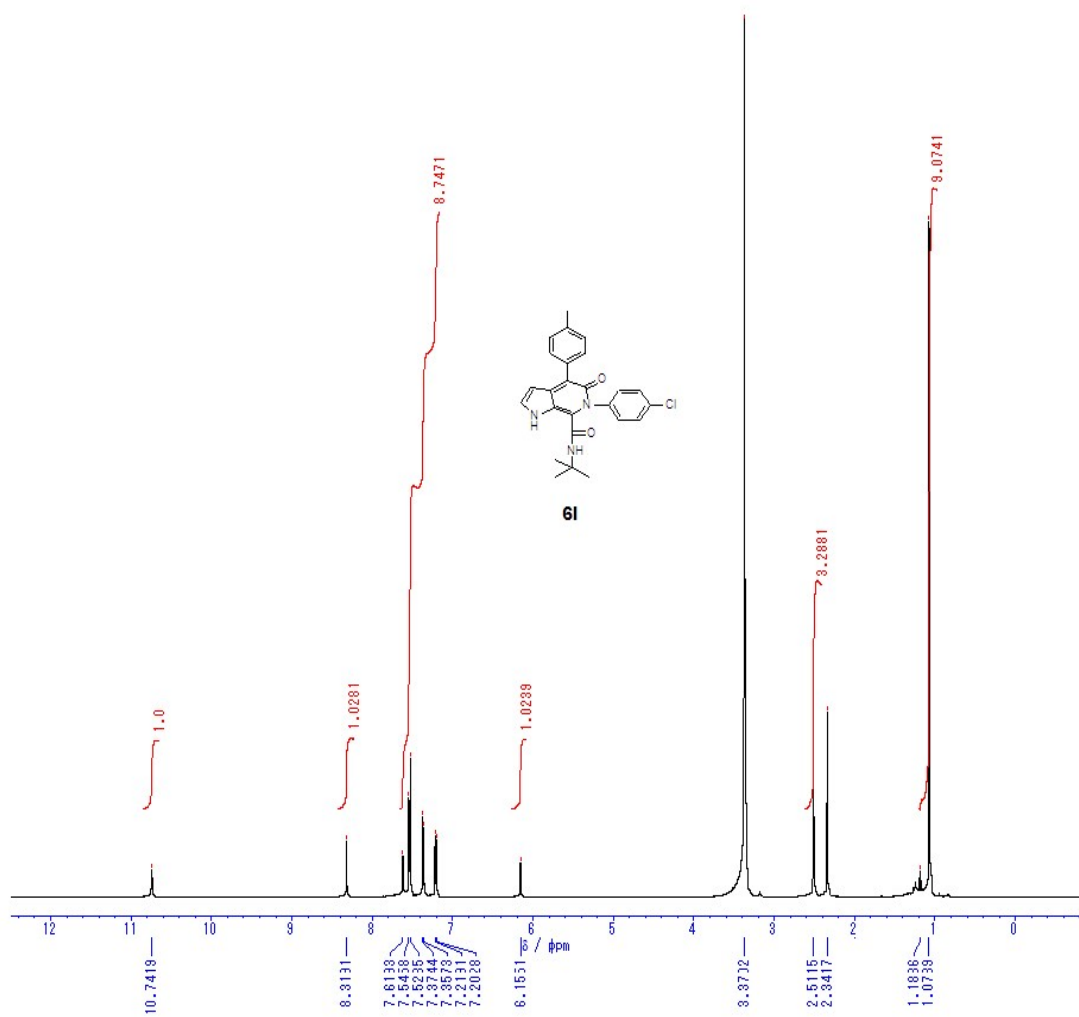

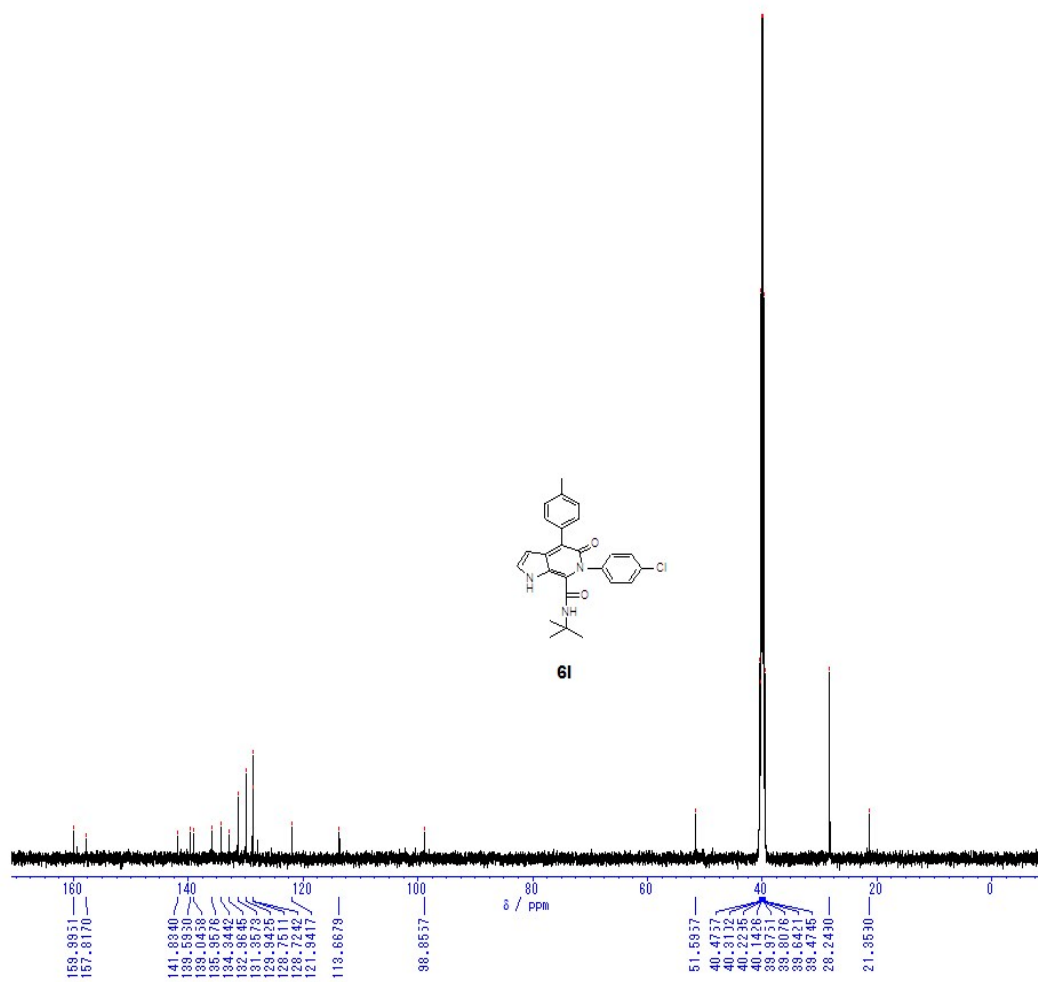

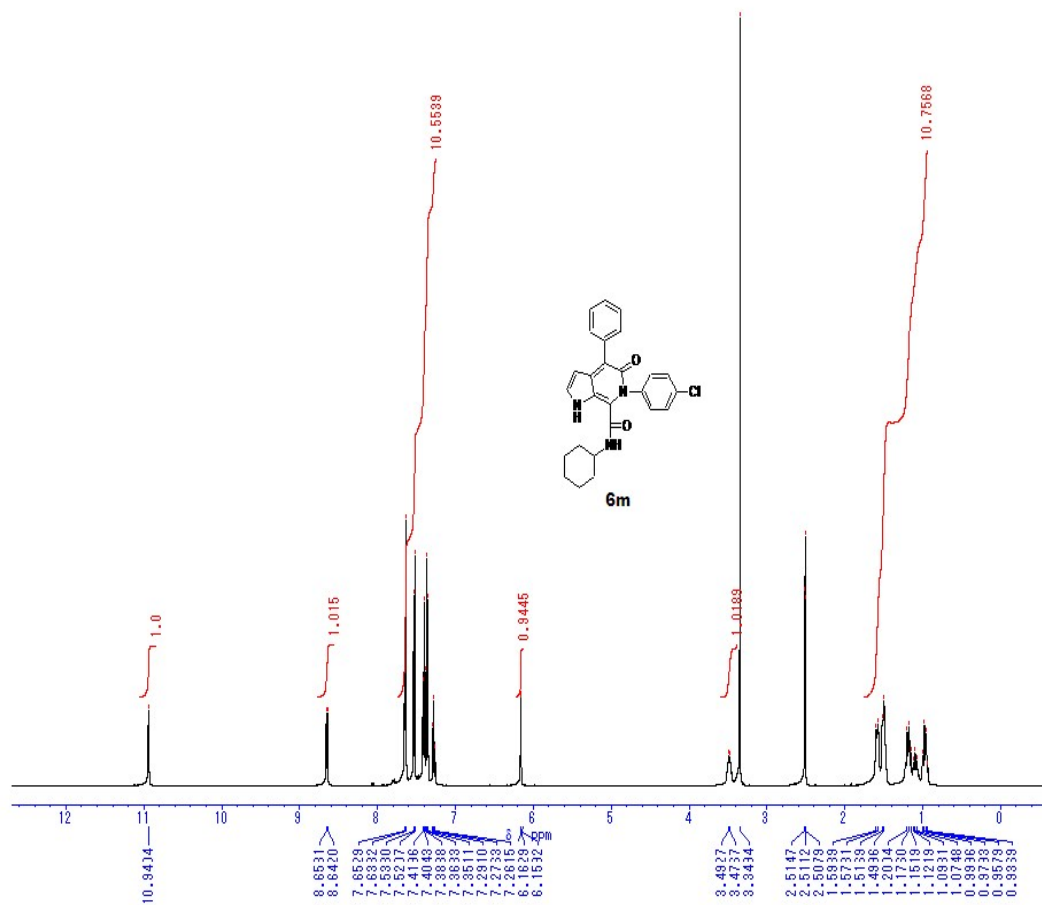



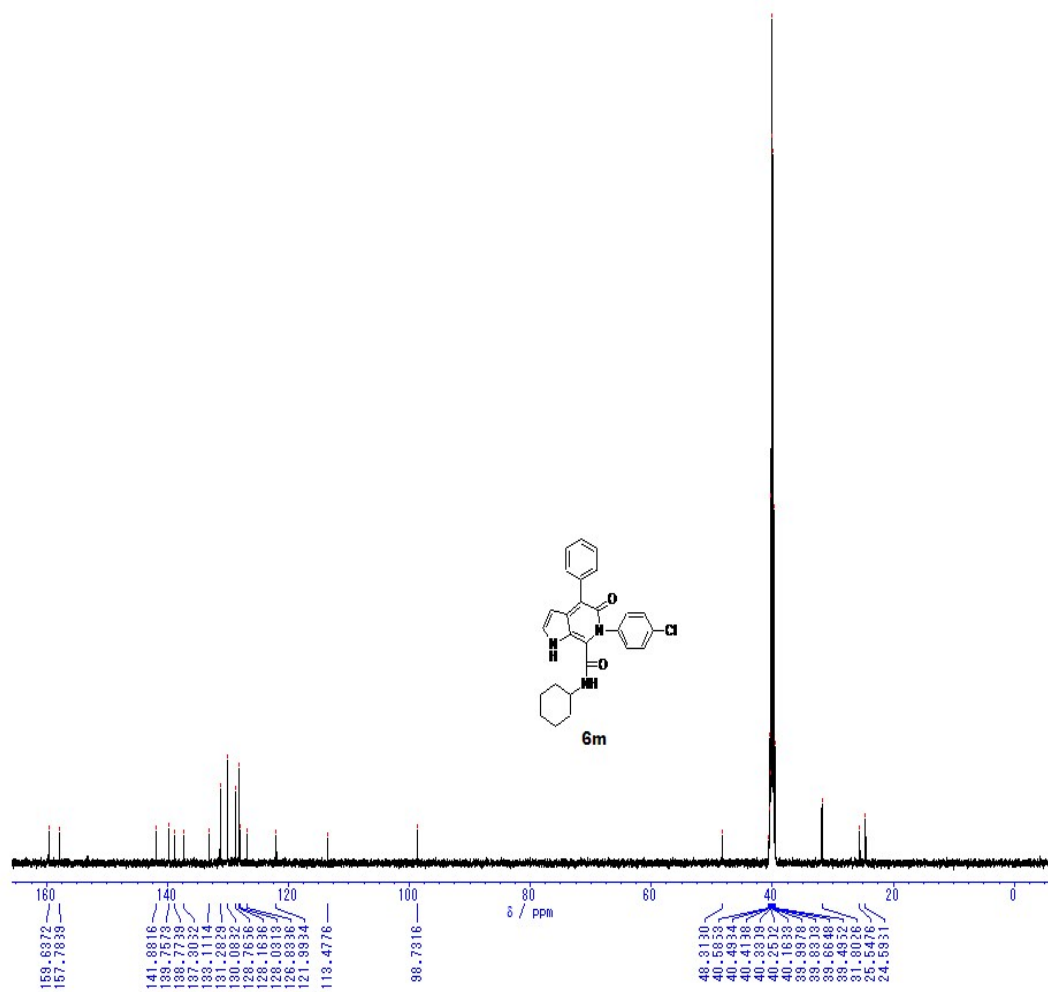

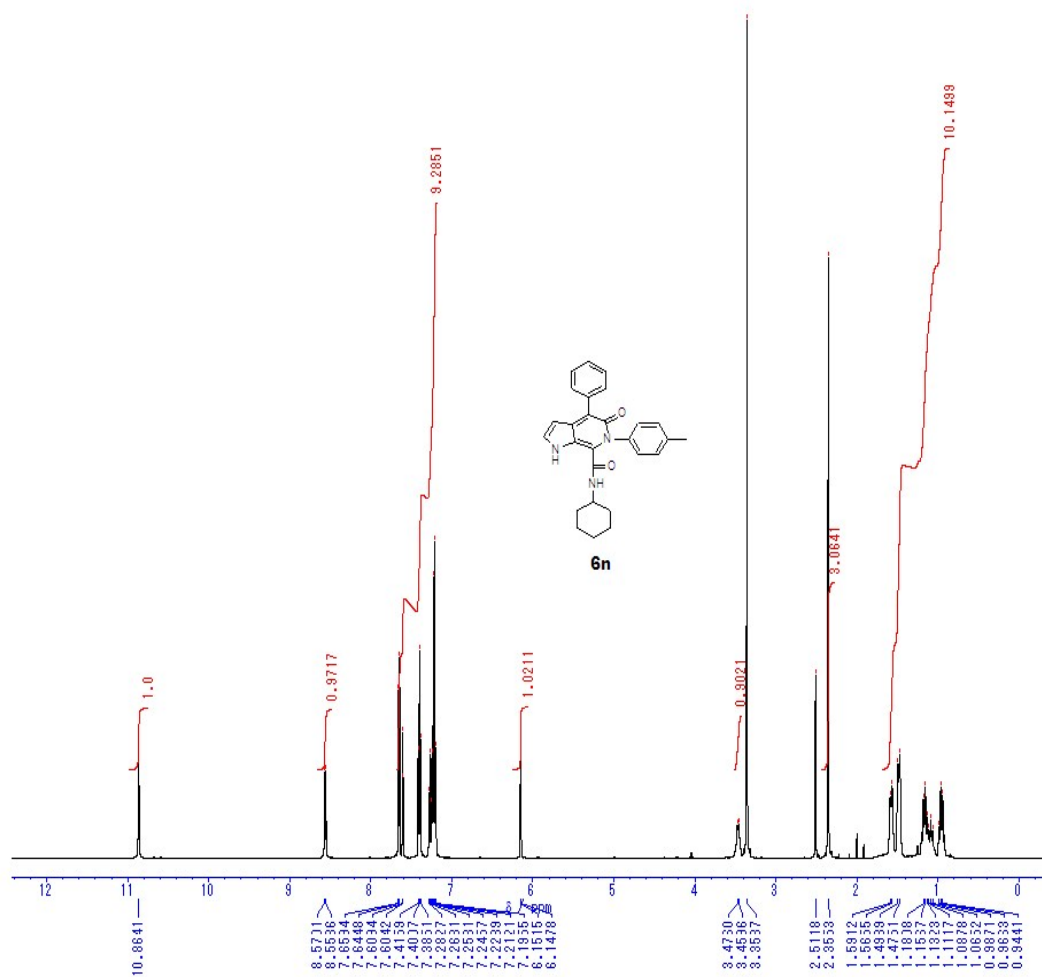

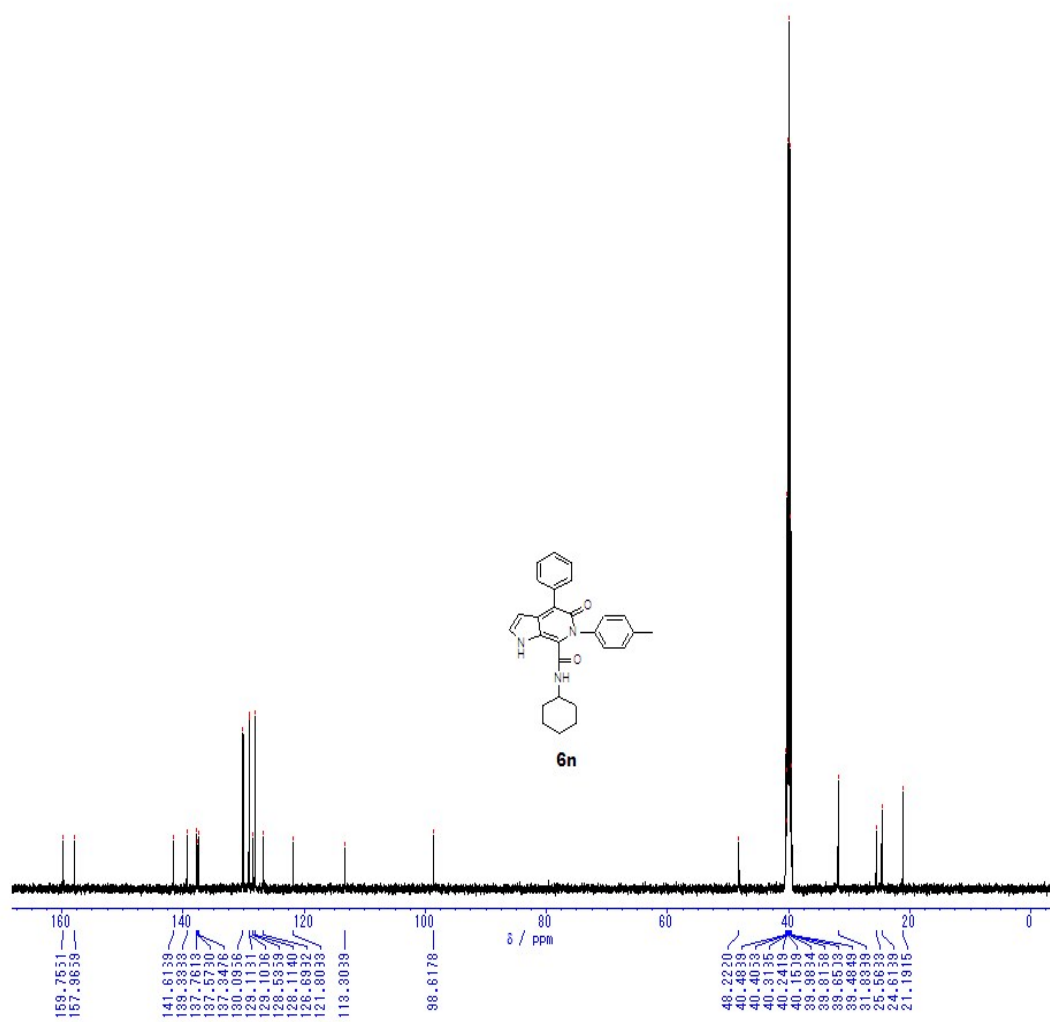

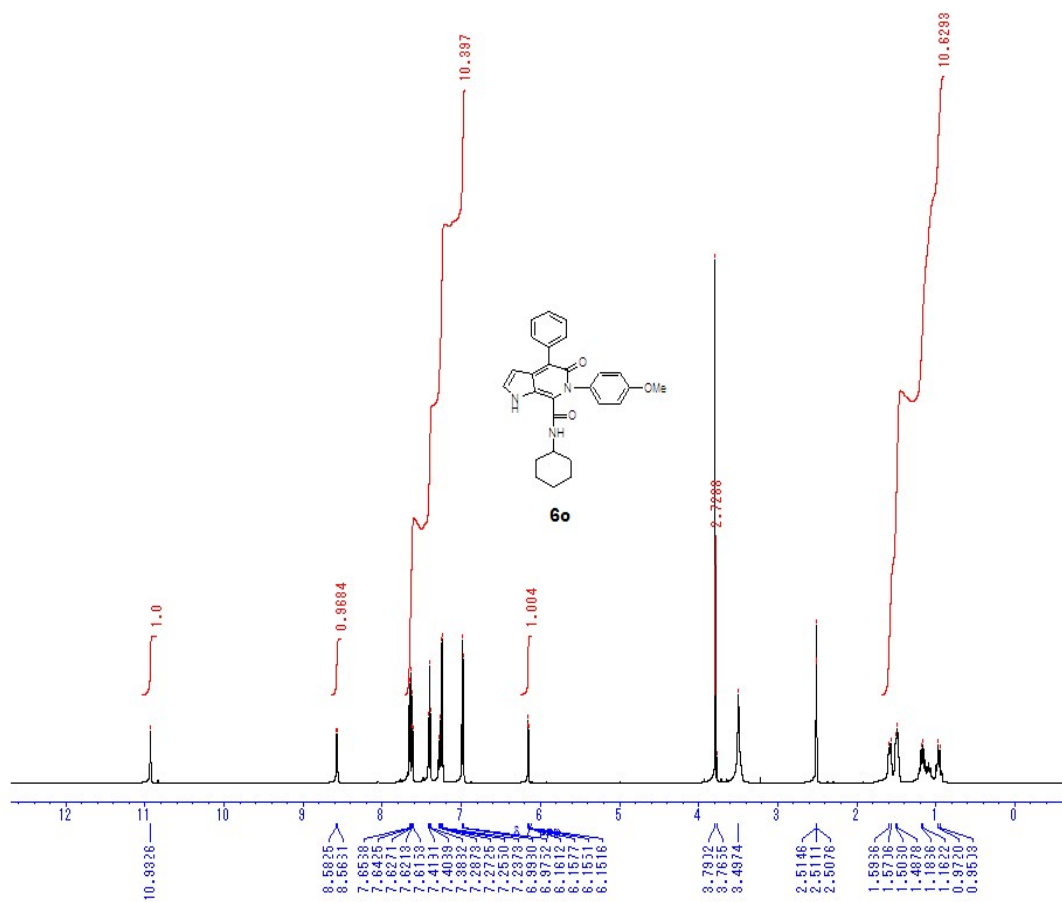

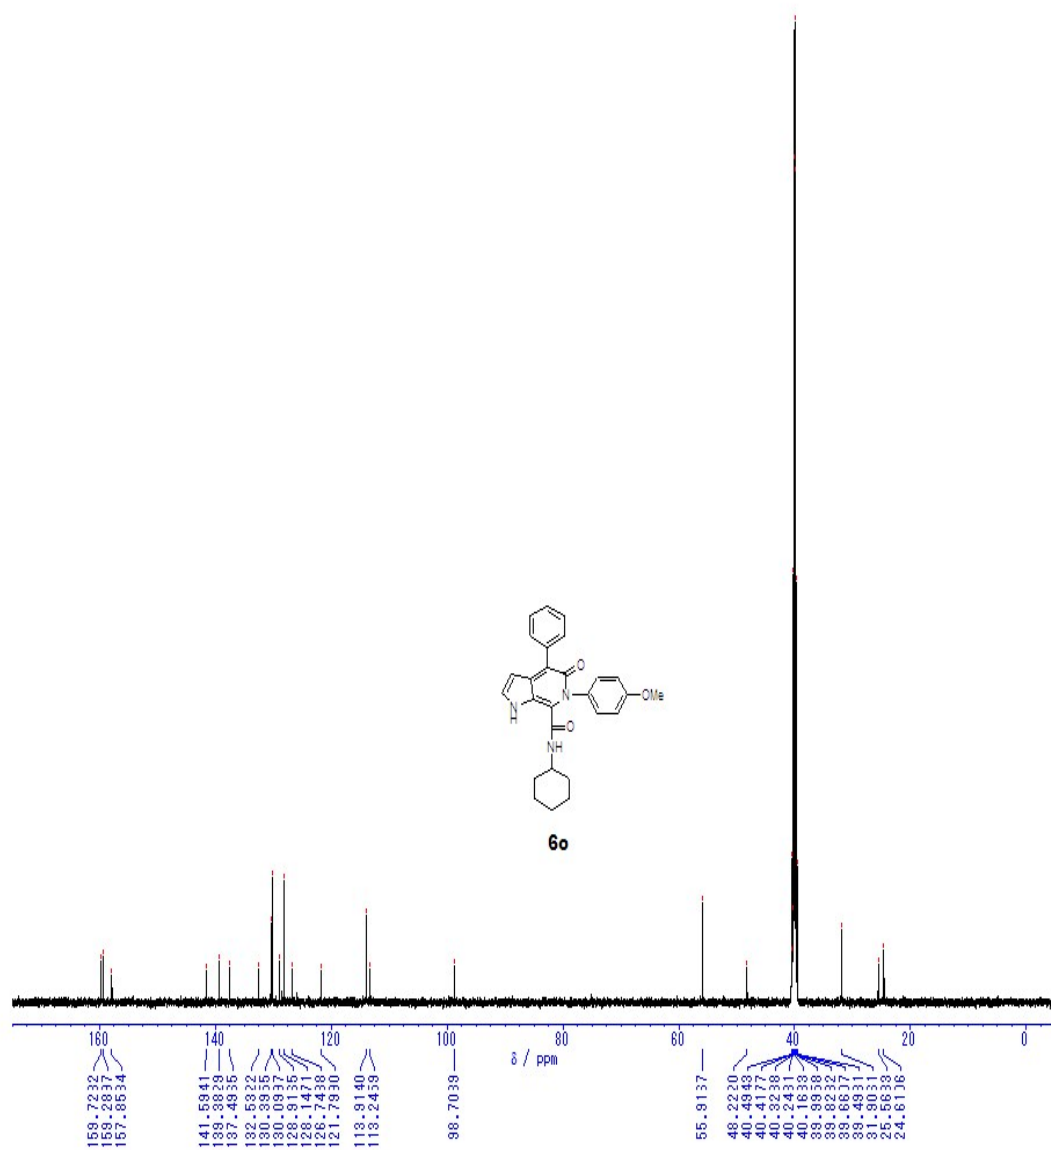

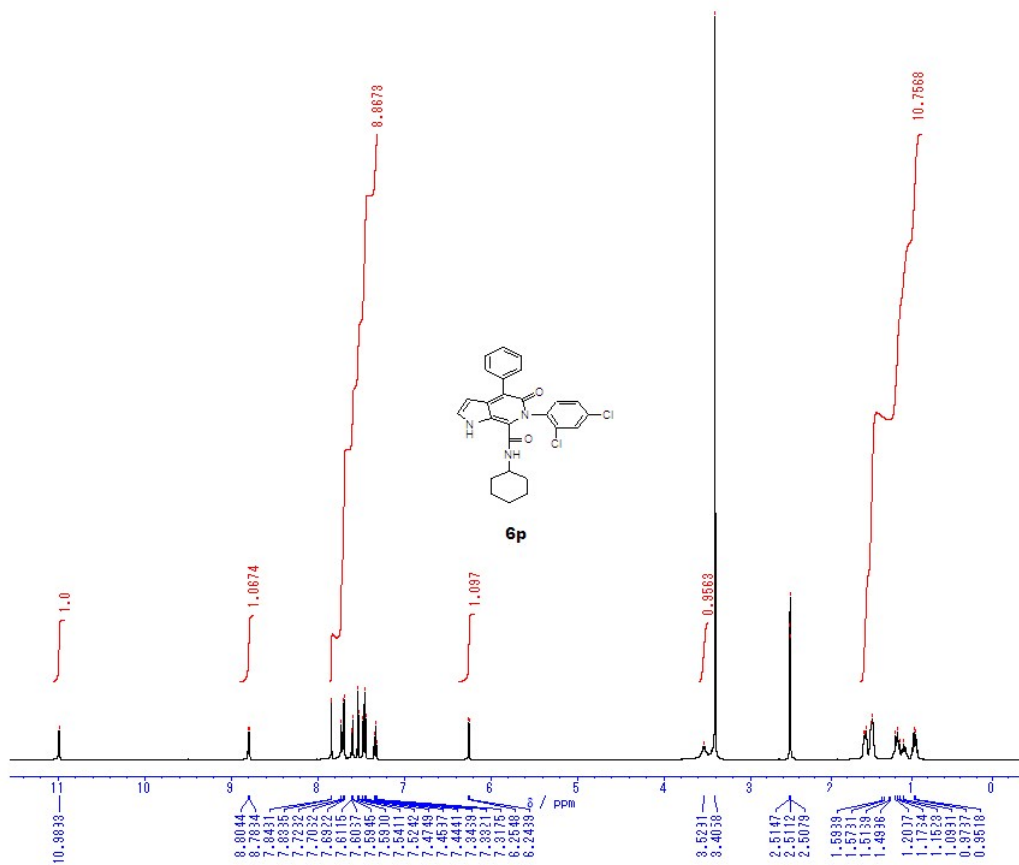

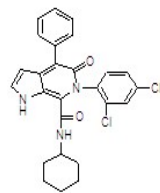

6p

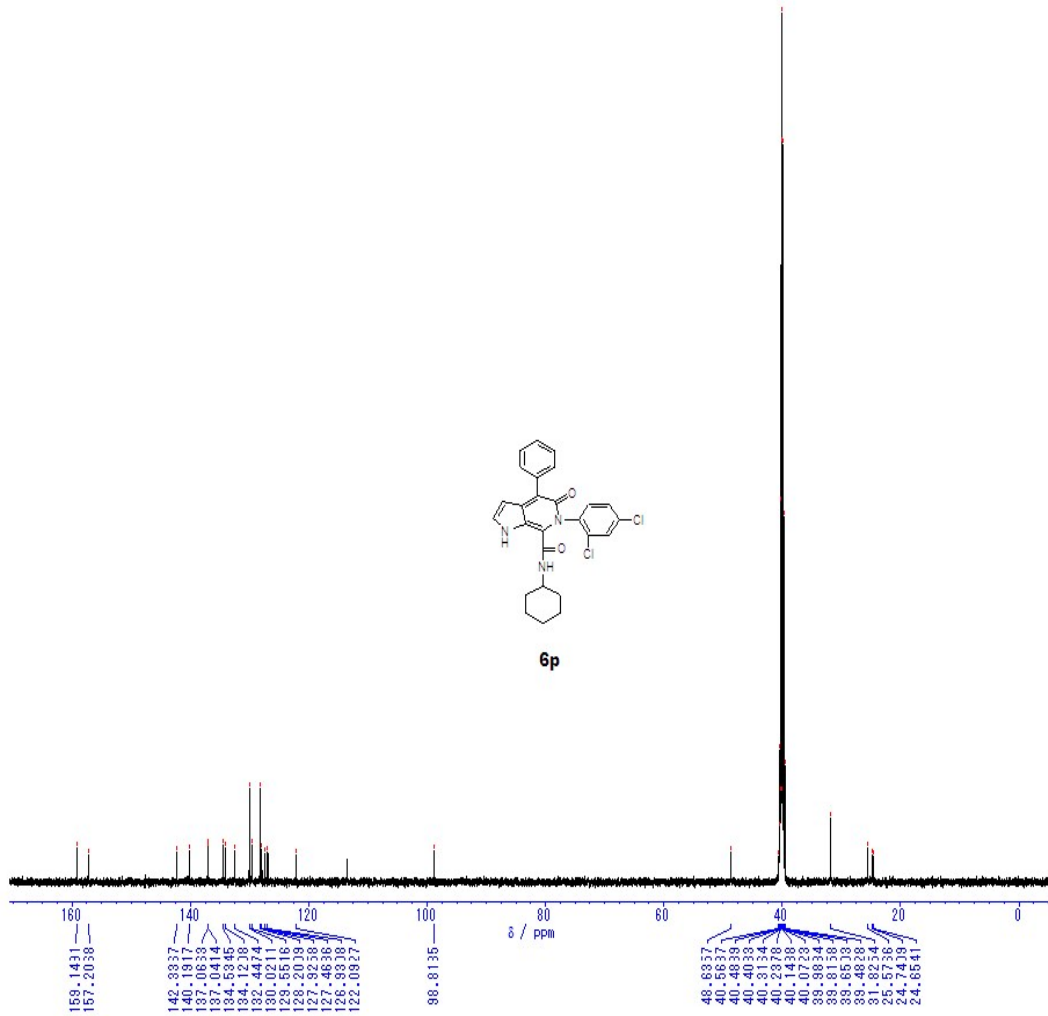

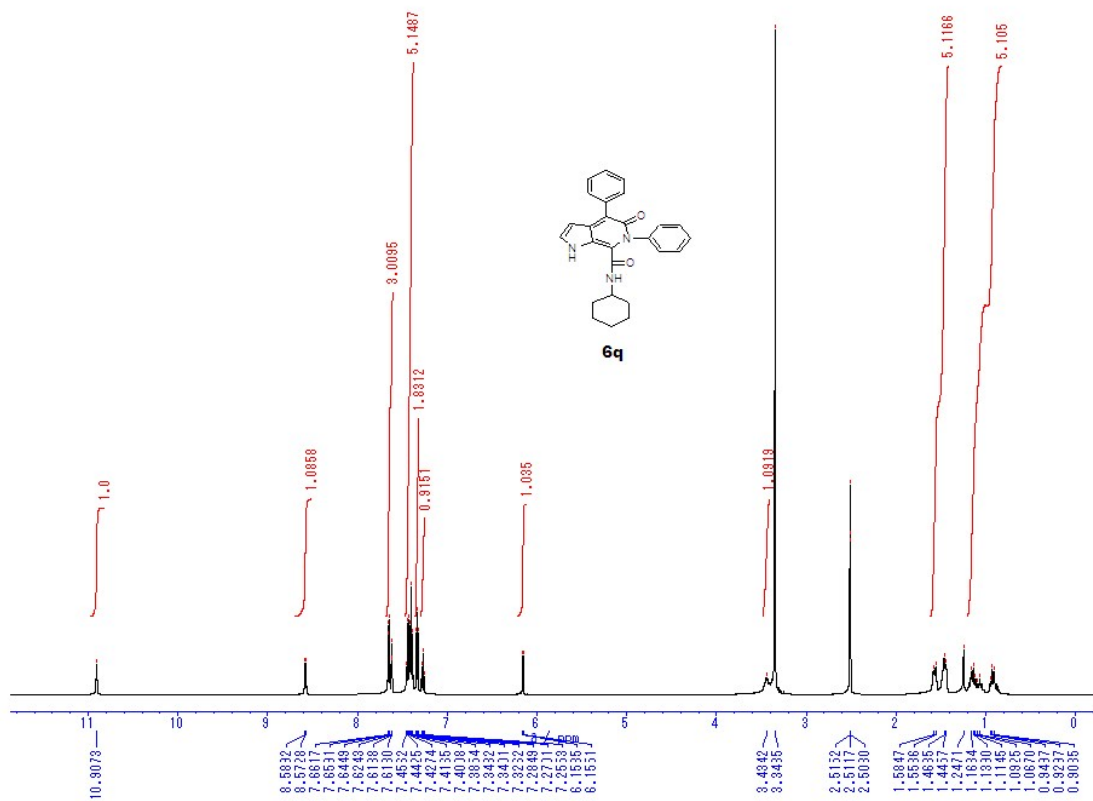



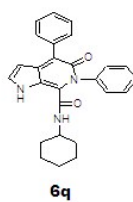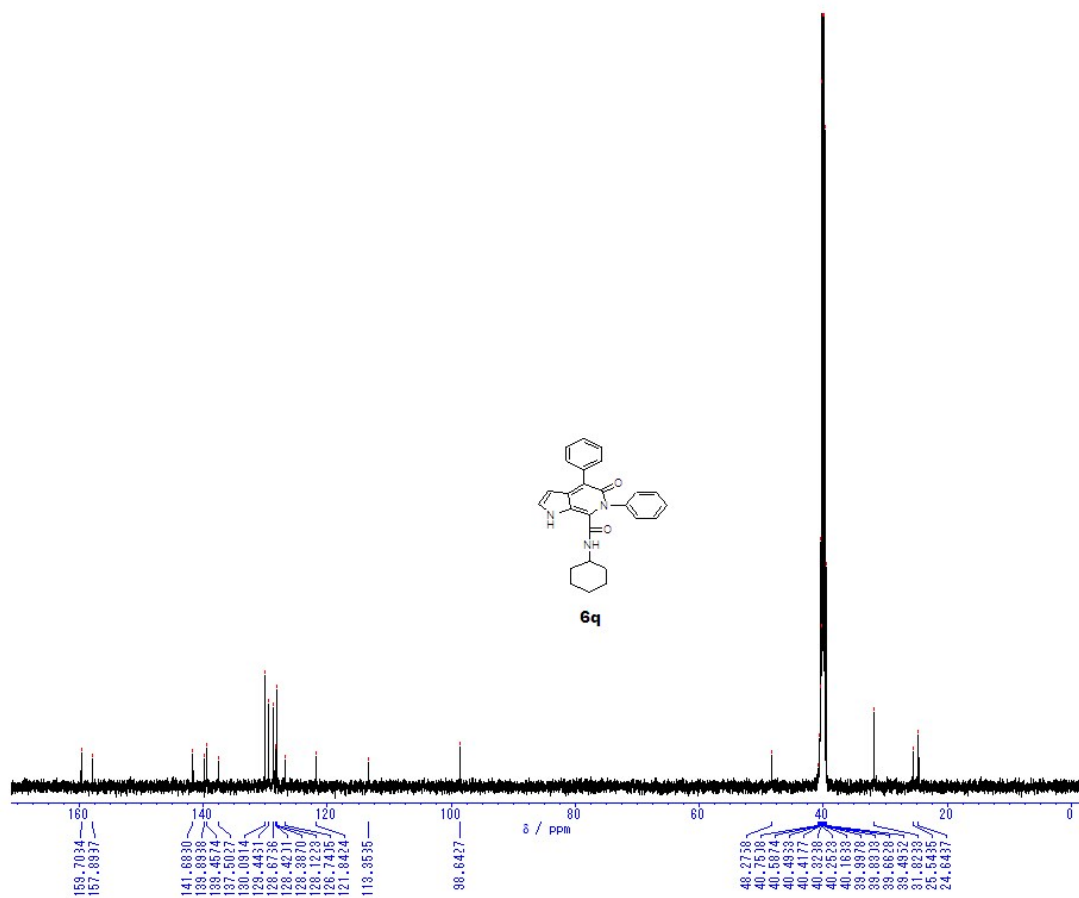

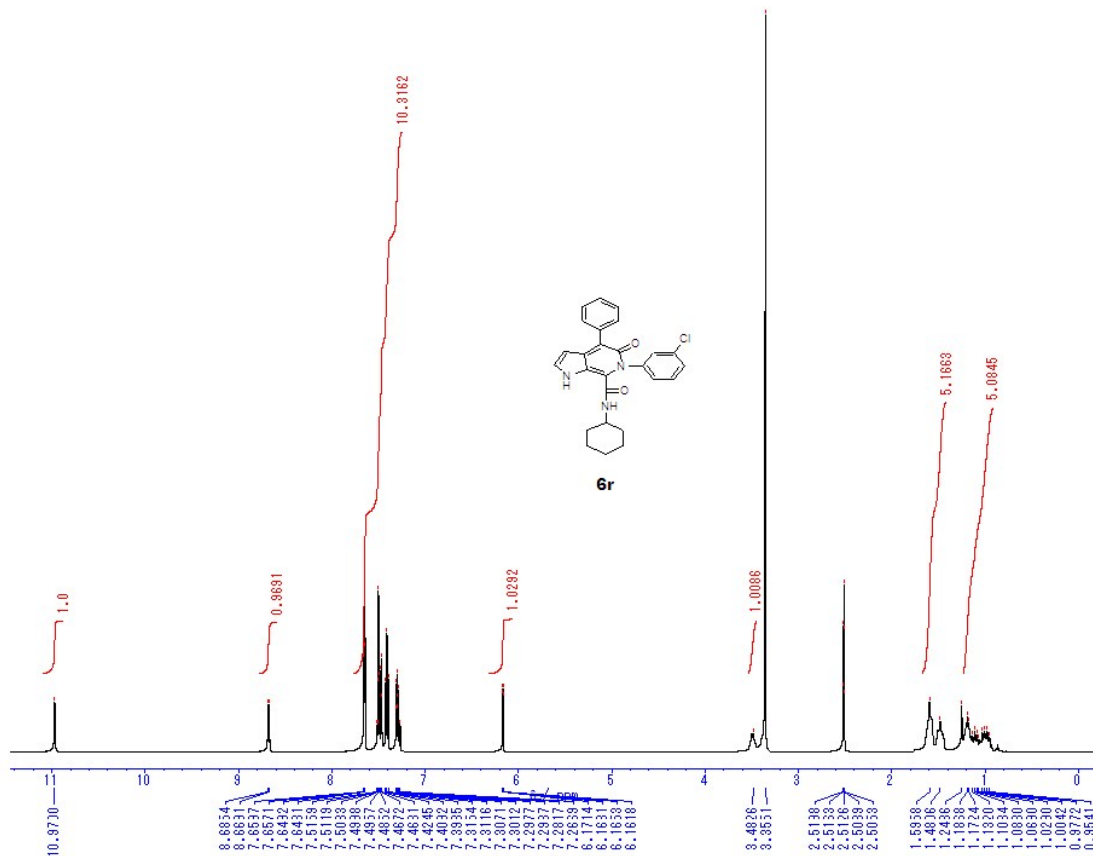

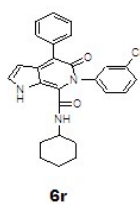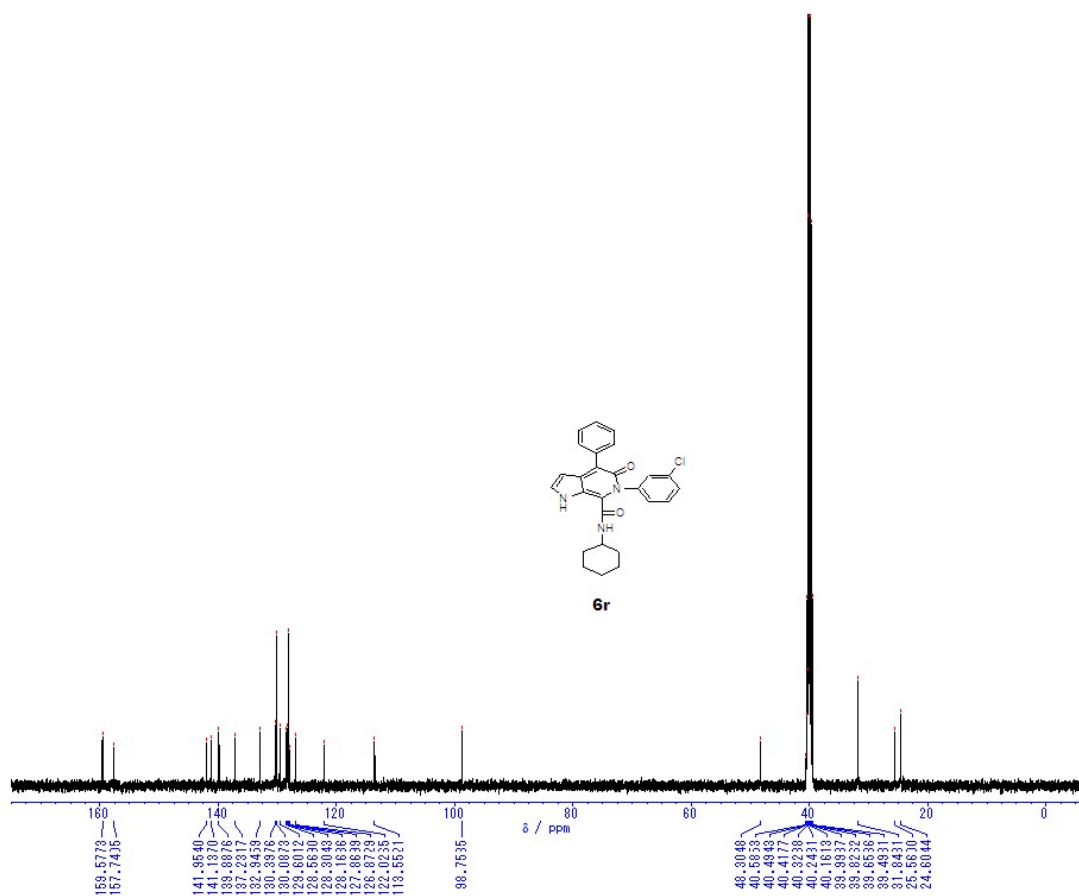

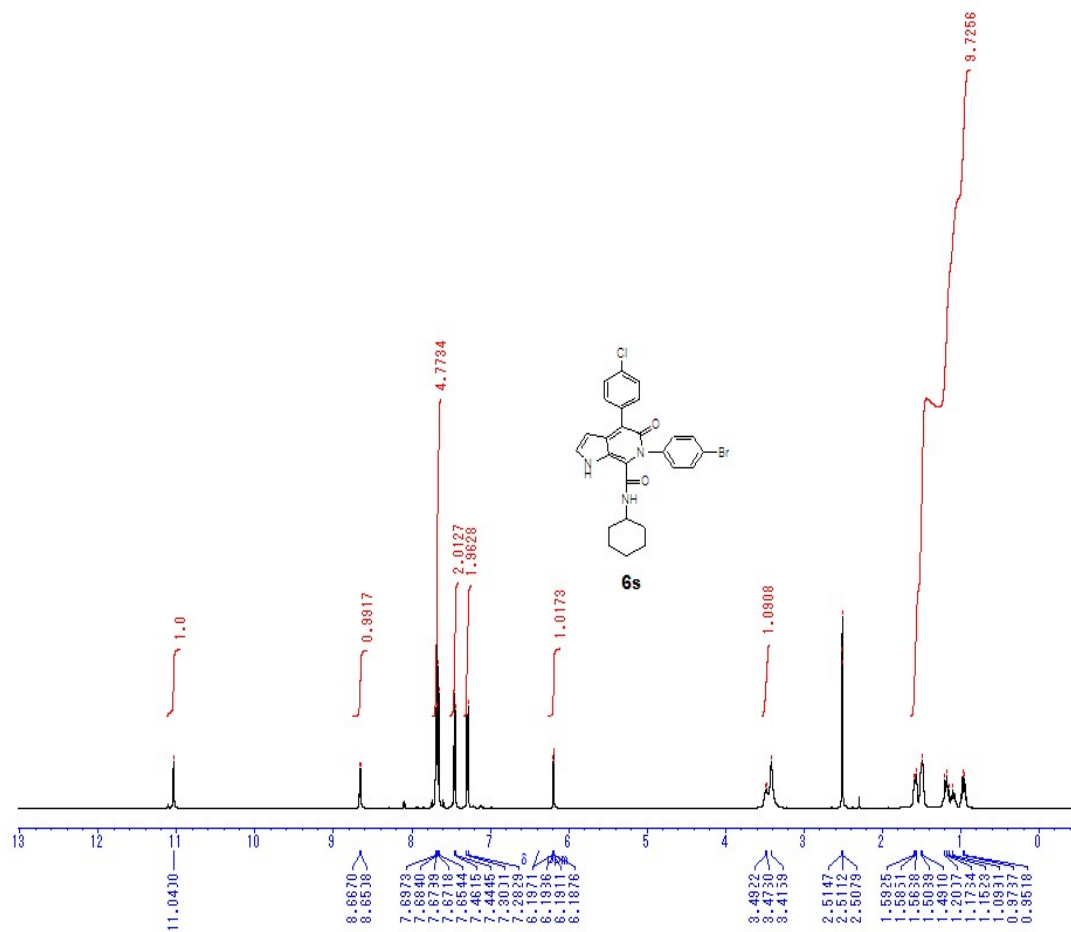

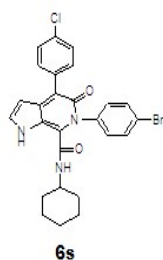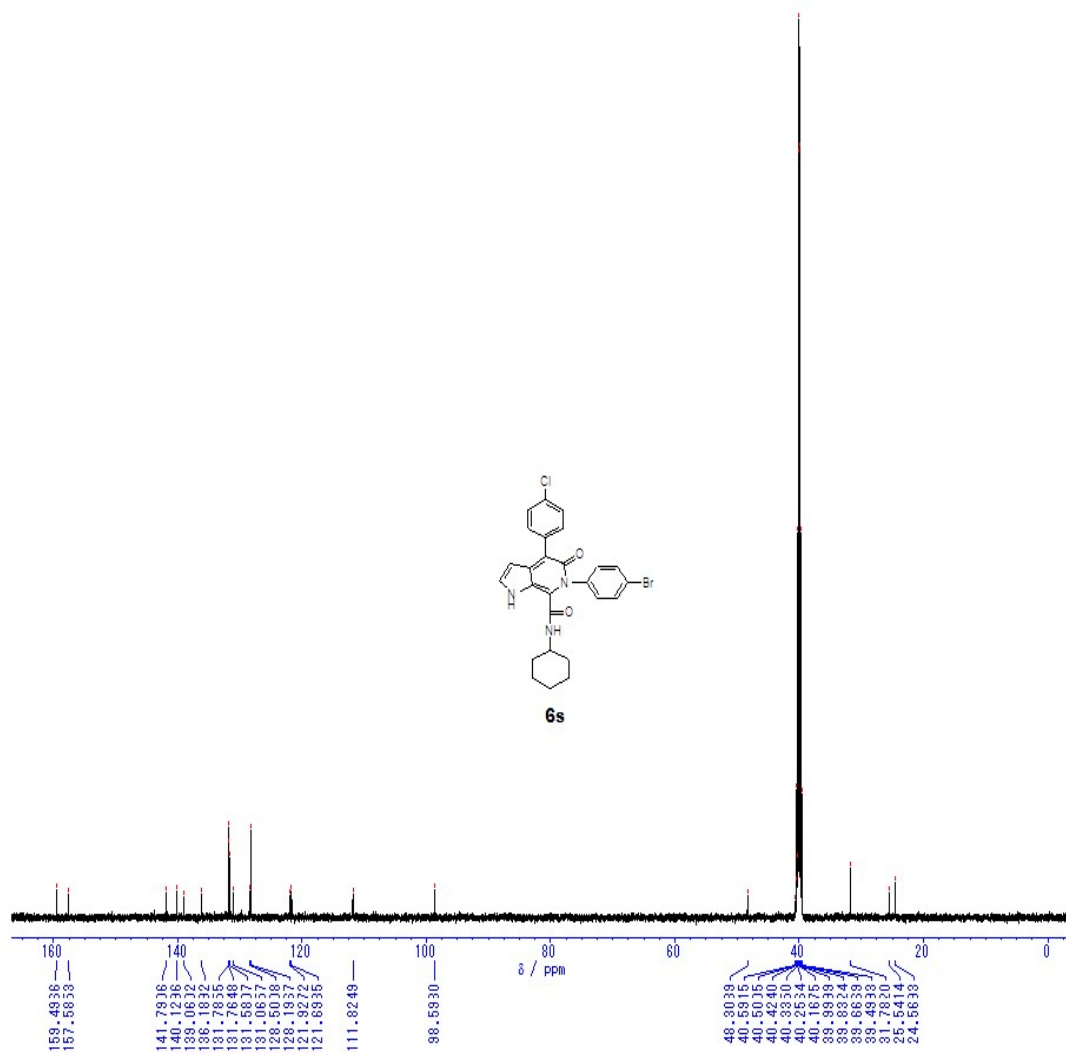

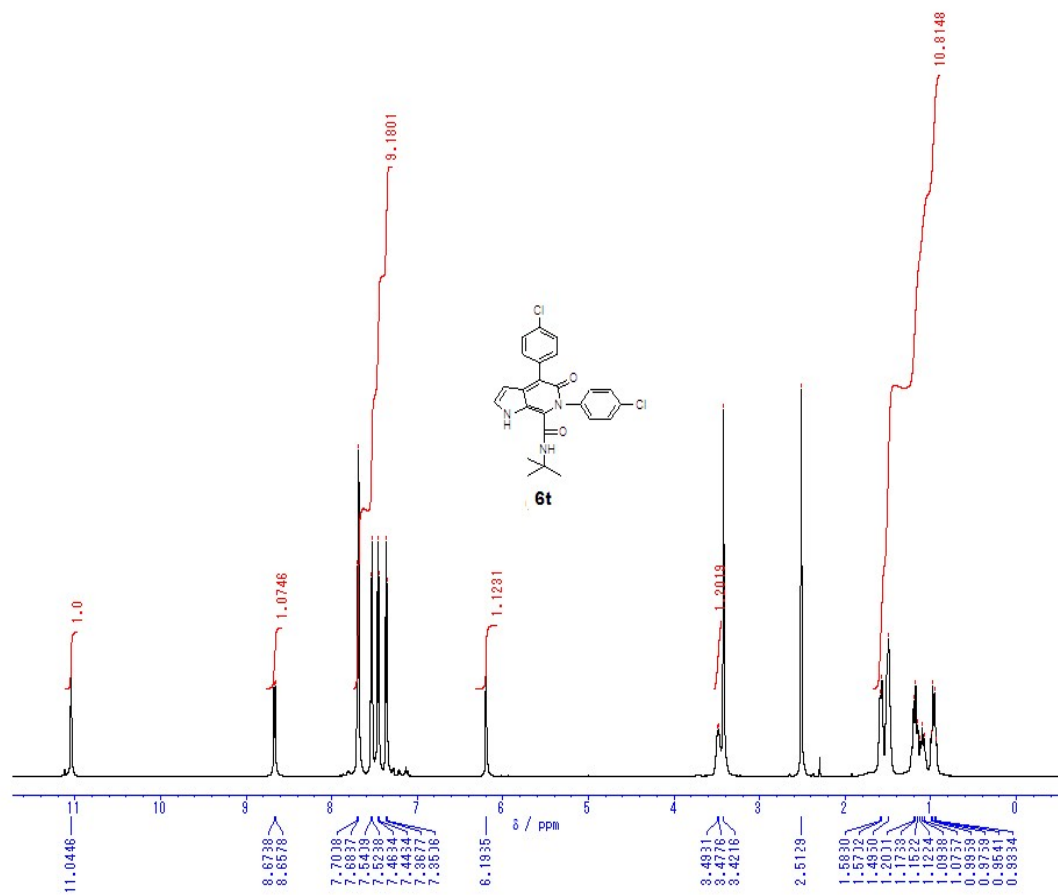

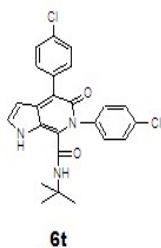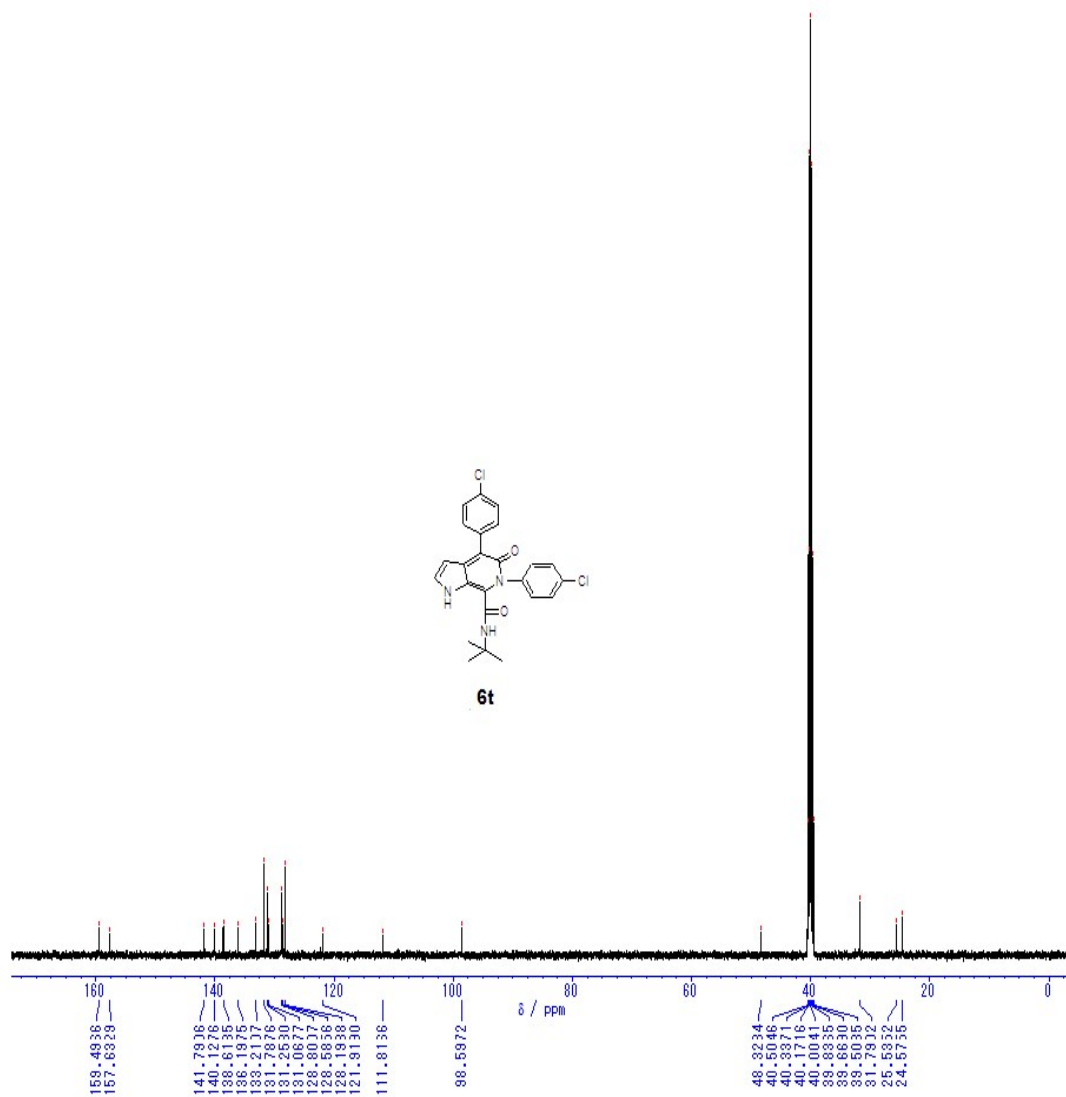

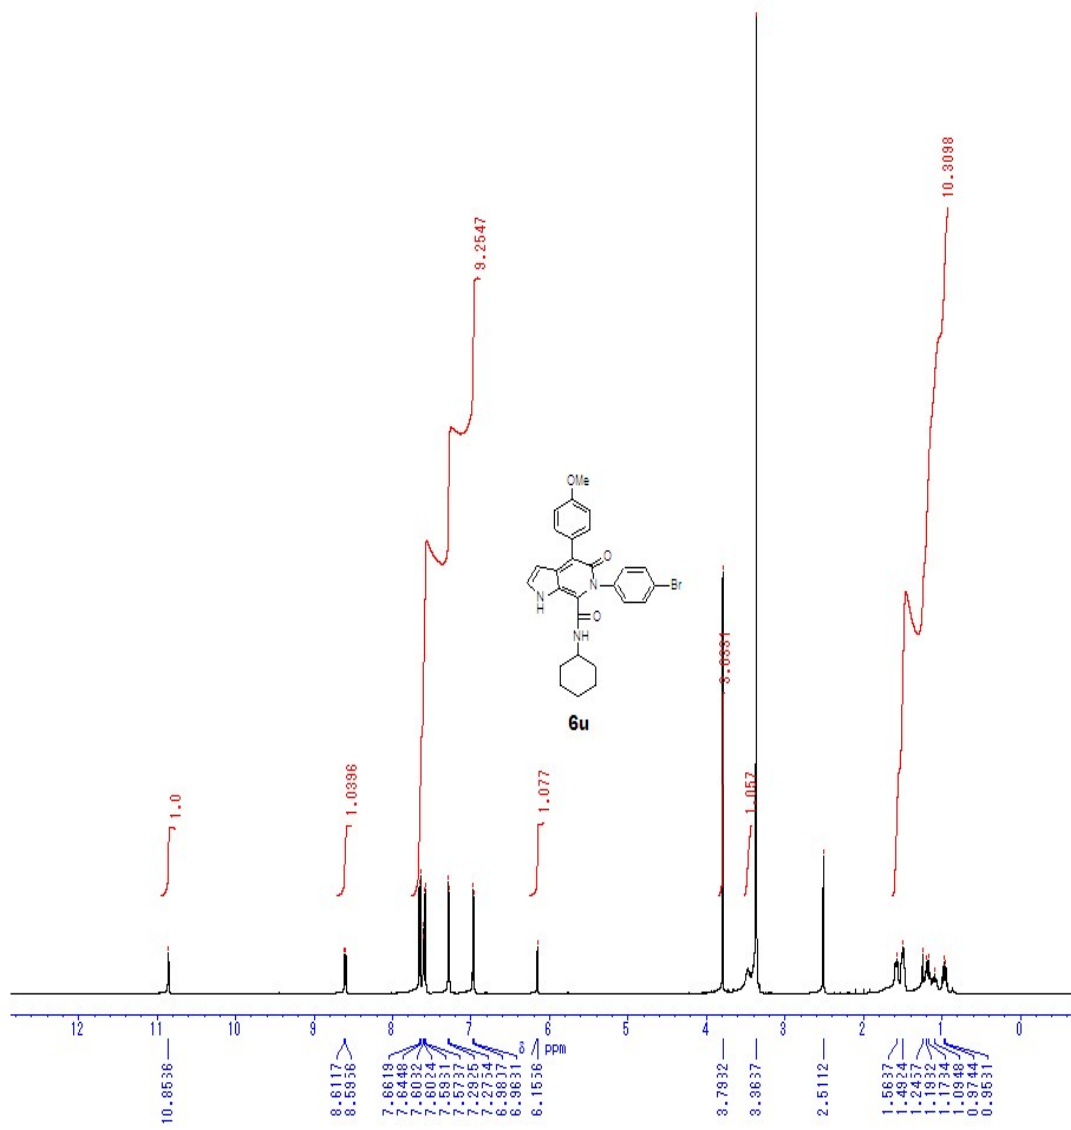



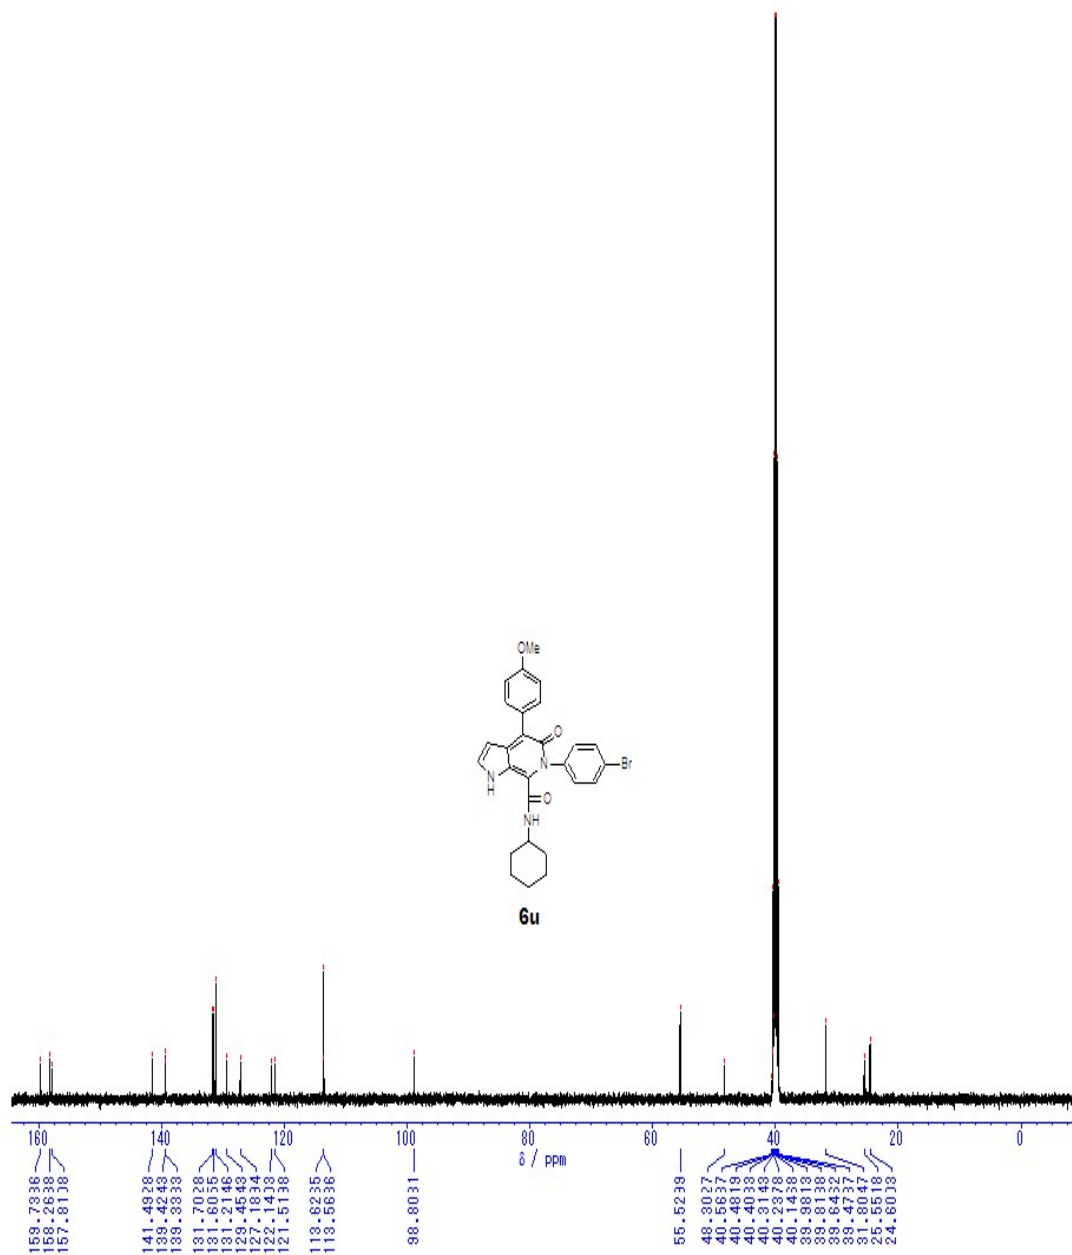

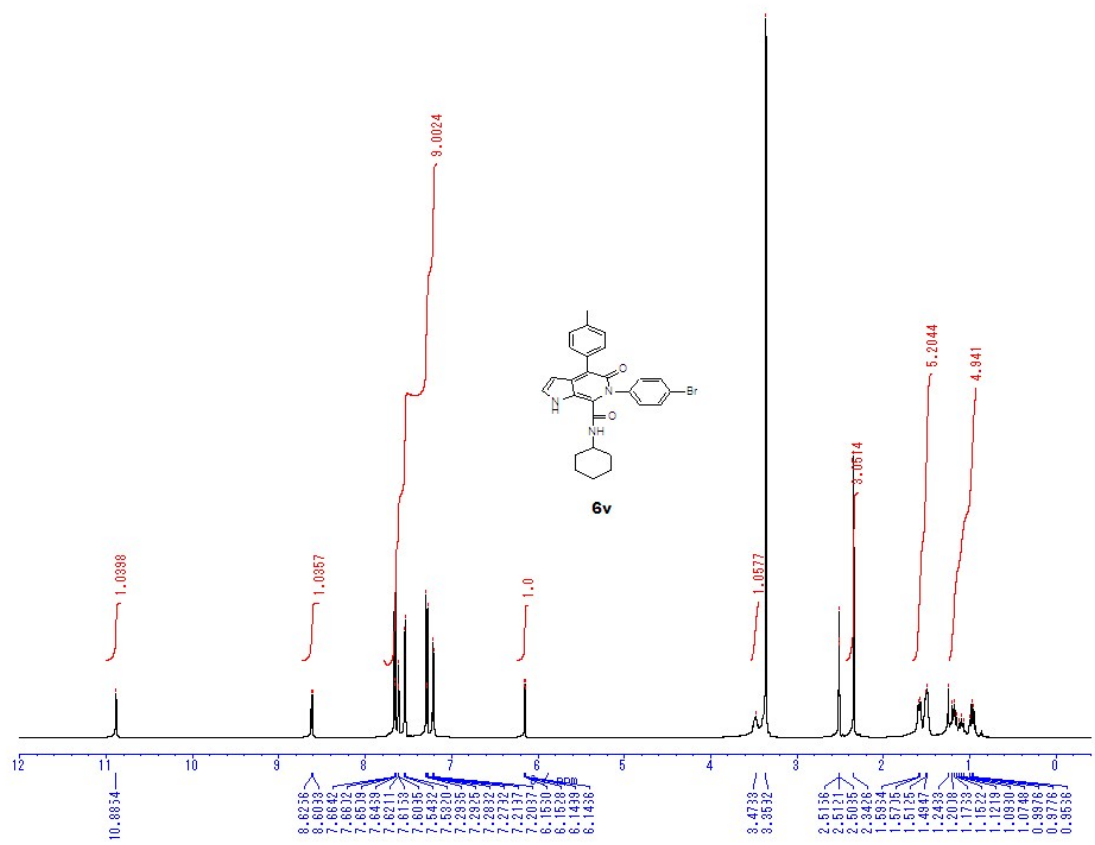

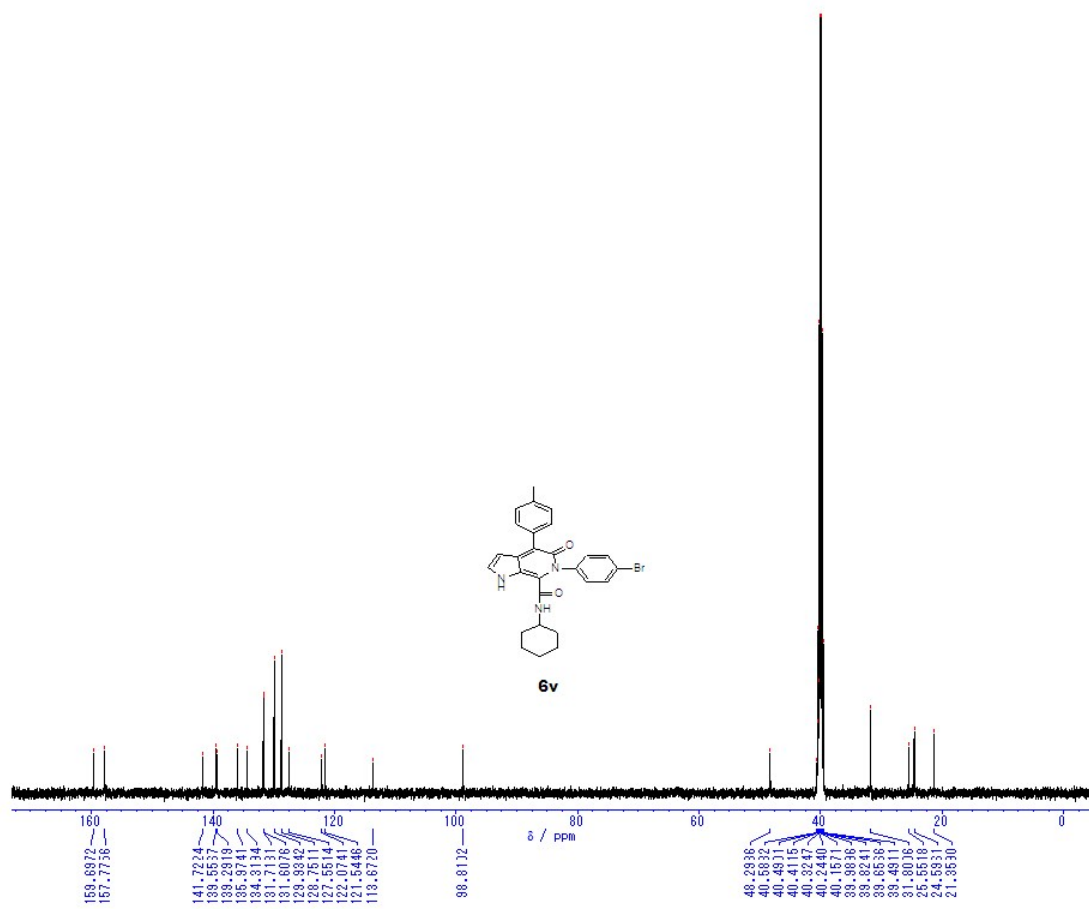



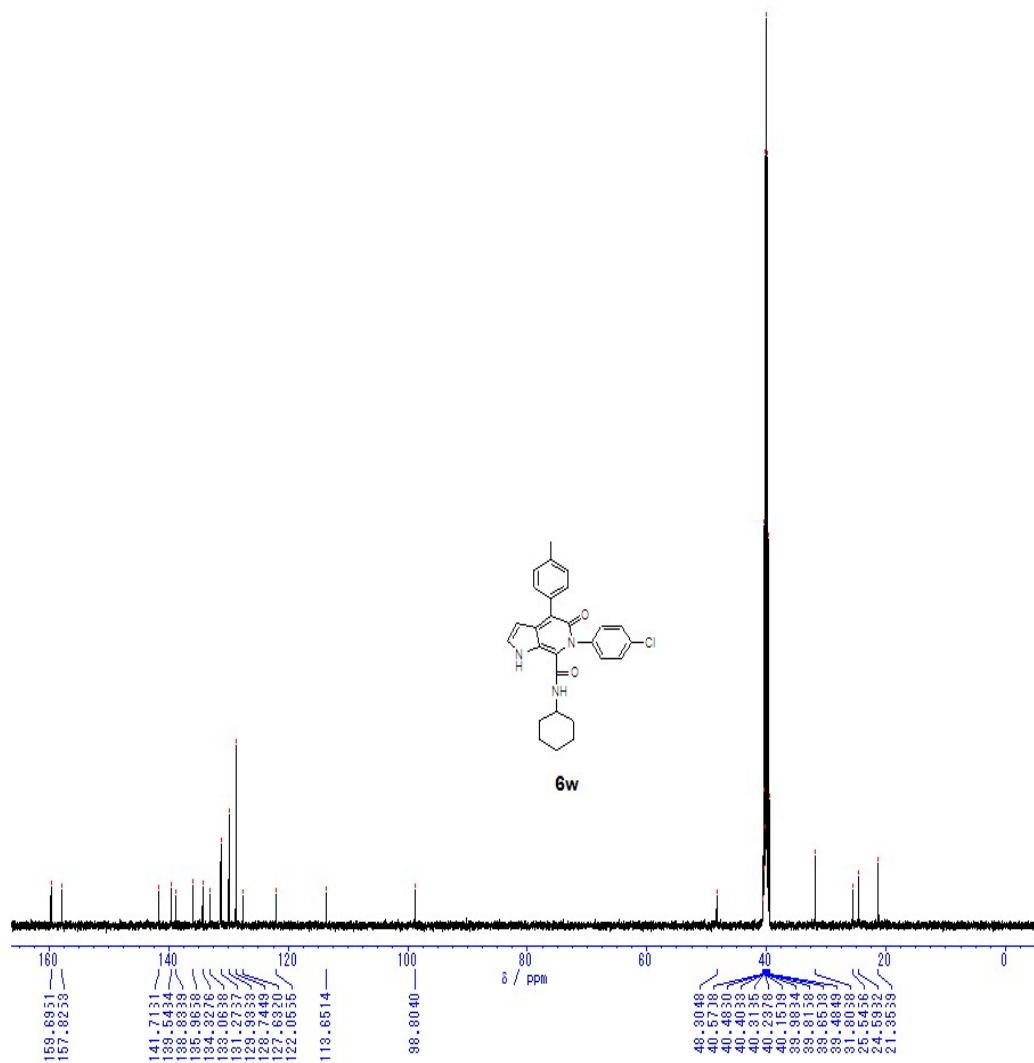

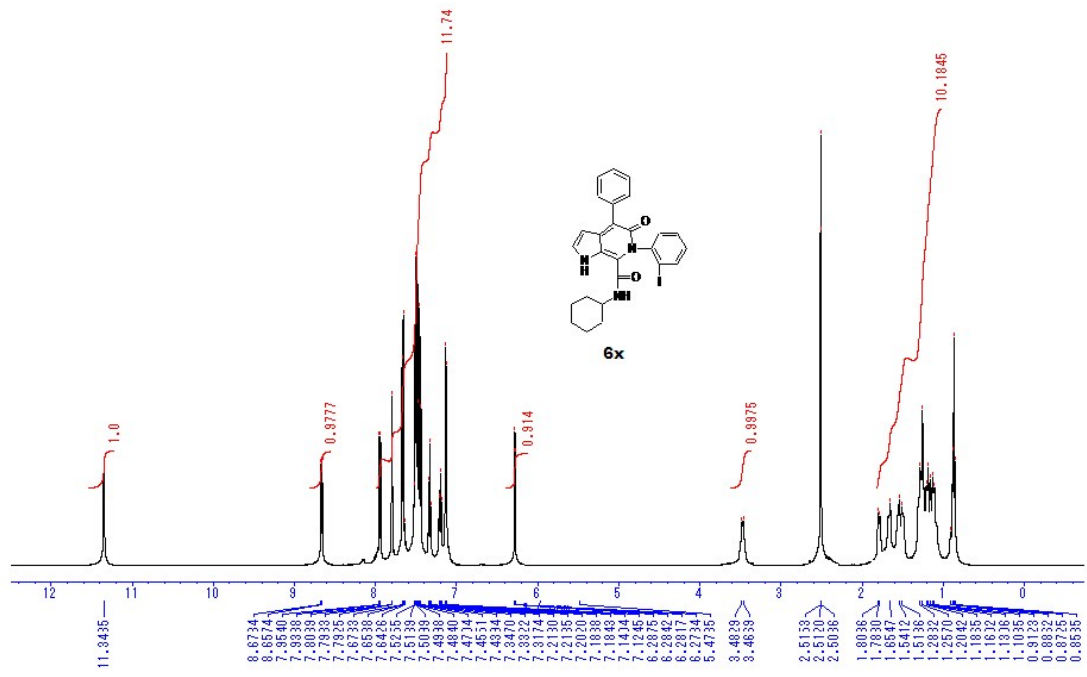

Star

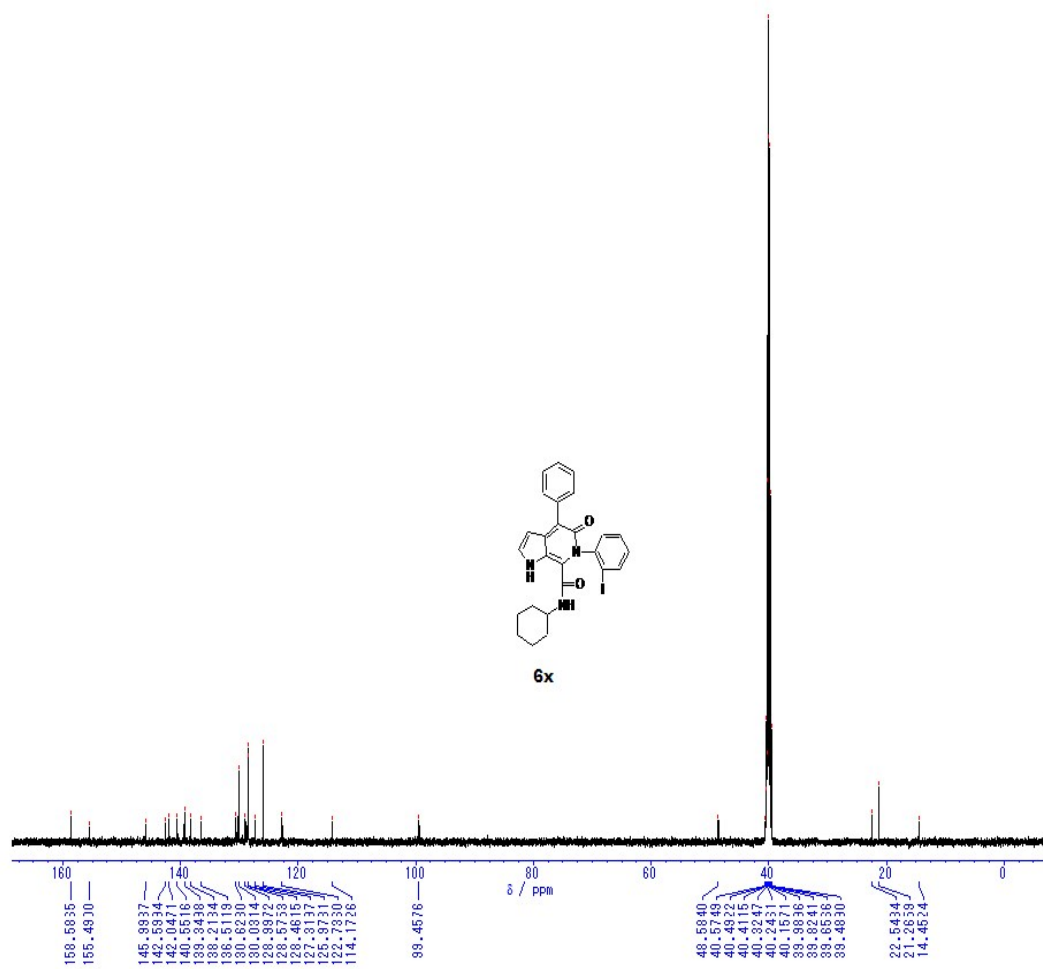

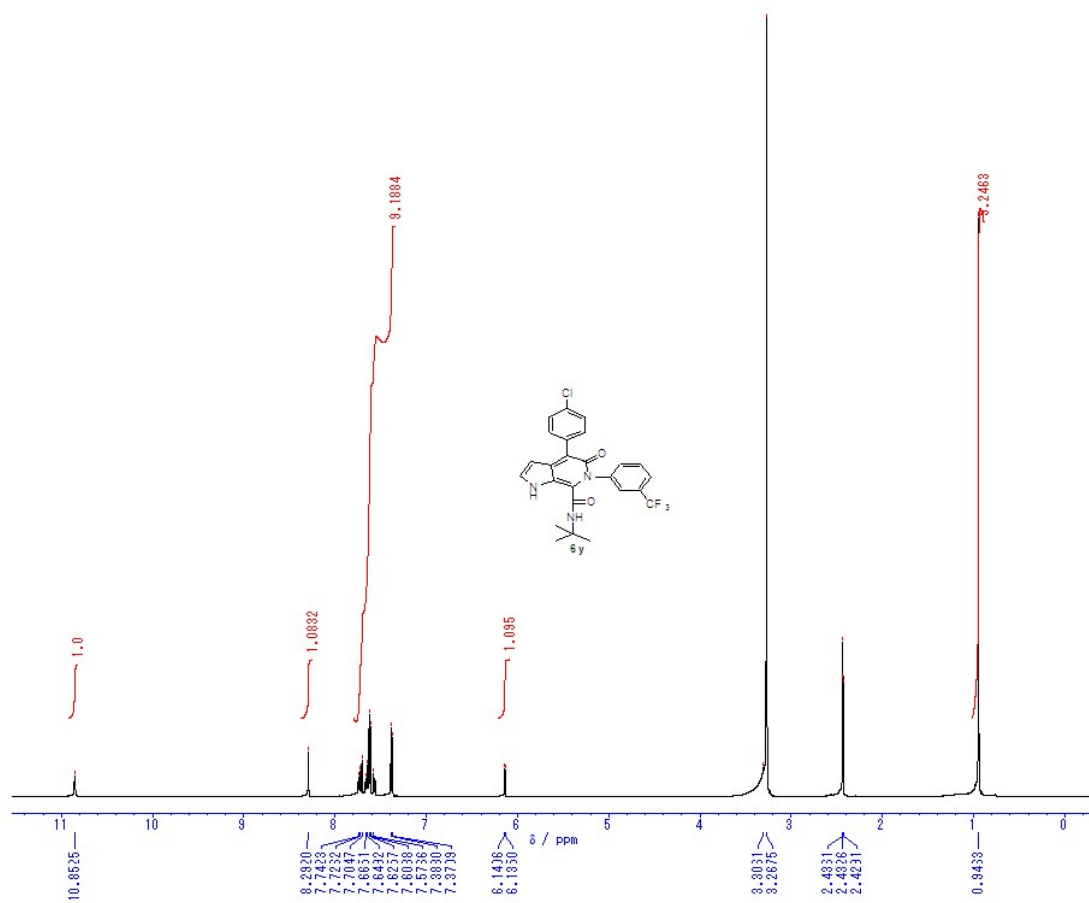



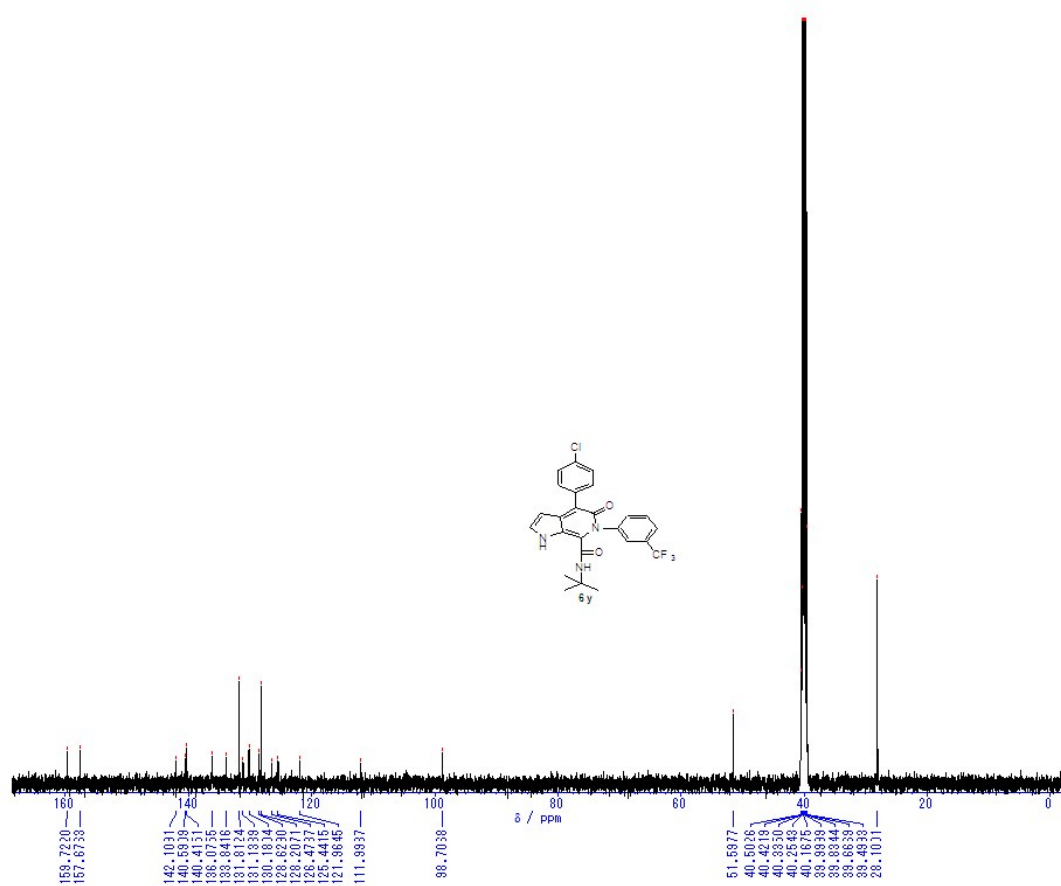

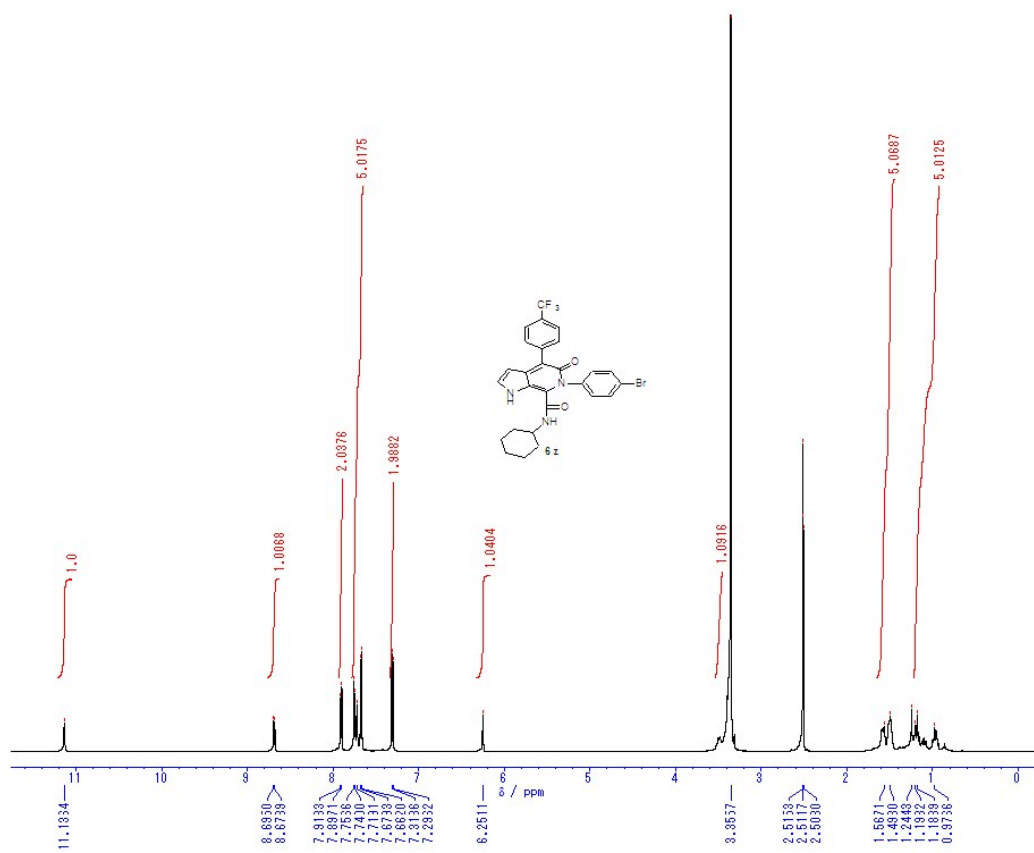

Star

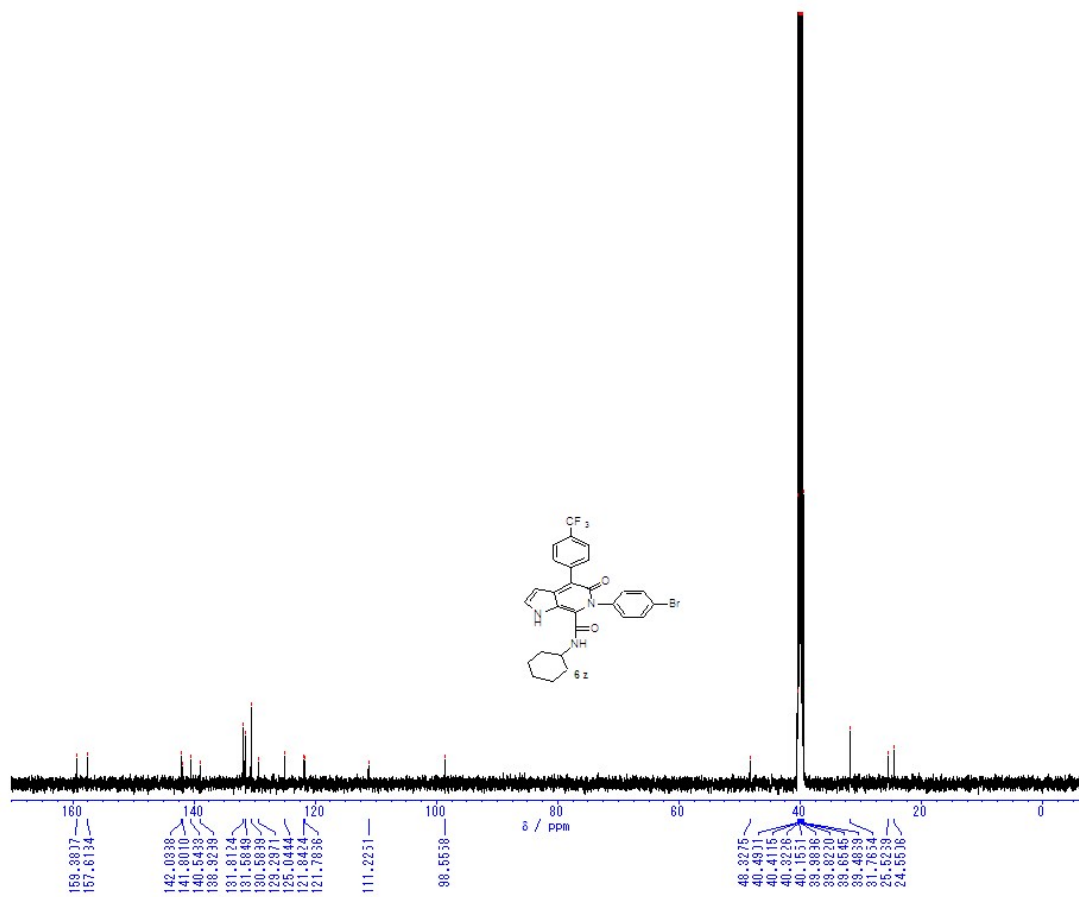

Supplement: c6nj02569b1.pdf [file c6nj02569b1.pdf]
